# Supplementary material for: Genetic Drift and <em>Alphapapillomavirus</em> Evolution
Source: Preprints.org preprint supplement (doi:10.20944/preprints202306.0020.v1), 2023-06-01

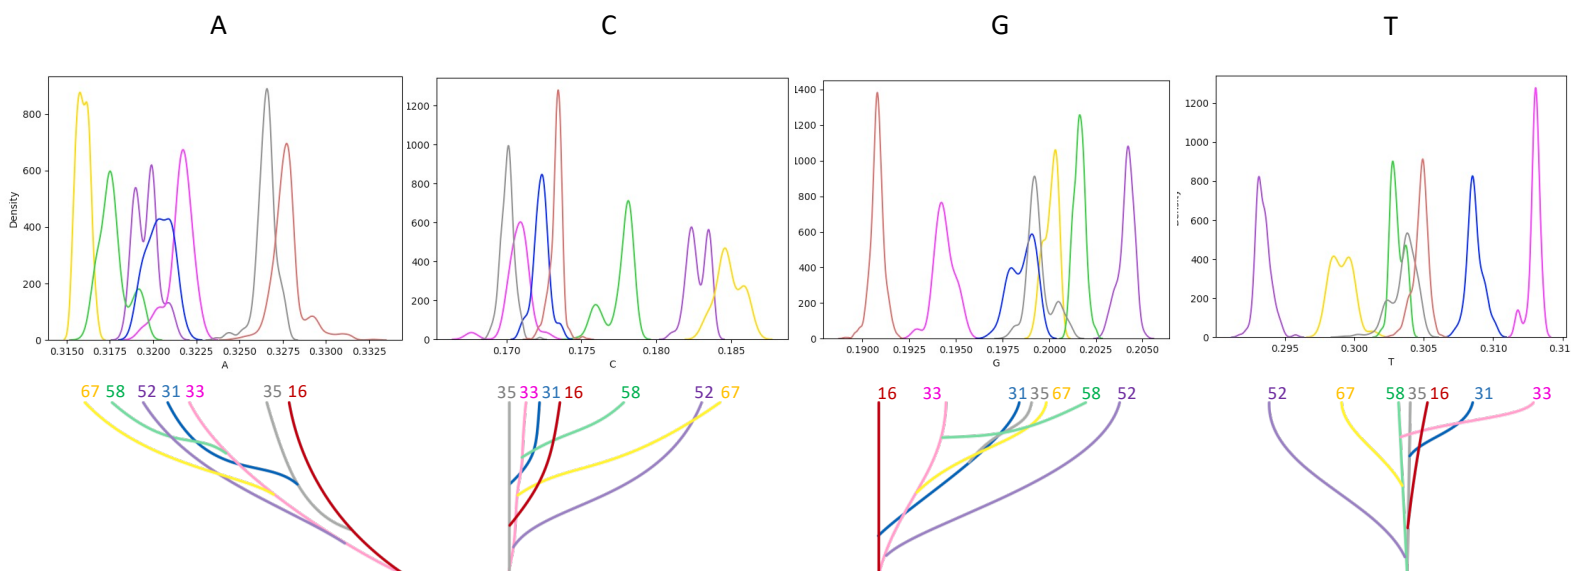

Base compositions from 1,278 complete *Alphapapillomavirus 9* genomes standardized to equal representation by HPV type superimposed on phylogenetic trajectories from the directional-drift (nhPhyML) estimate of the ancestral composition for the species.

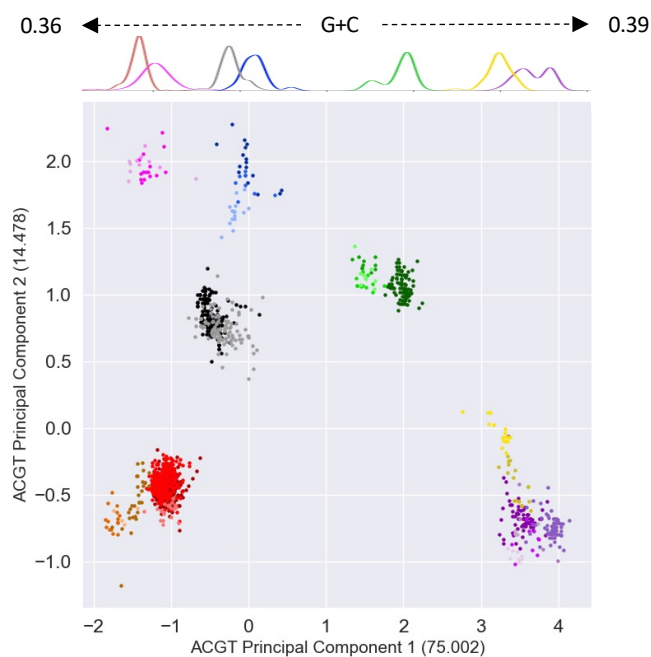

G+C content superimposed on the first principal component of base compositions (see Figure 5) from 1,278 complete *Alphapapillomavirus 9* genomes.

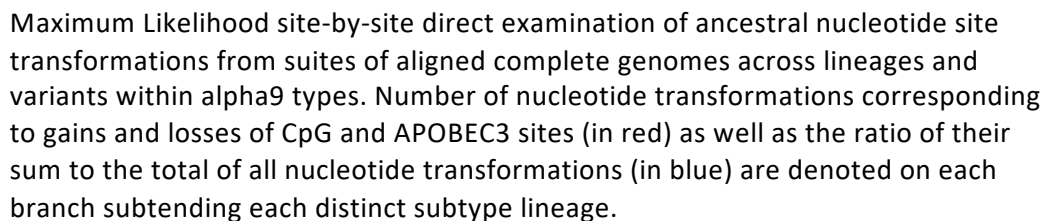

Supplement: Supplementary file 1 [file supplementary]
