# Supplementary material for: Genetic Drift and <em>Alphapapillomavirus</em> Evolution
Source: Preprints.org preprint supplement (doi:10.20944/preprints202306.0020.v1), 2023-06-01

S3. Significant changes in selection strength found with RELAX

K=selection strength, LR=likelihood ratio, <https://www.datamonkey.org/relax/>

**LR2**: selection relaxation was significant (K = 0.63, LR = 50.72, p = 0.000) as compared to *Alphapapillomavirus*


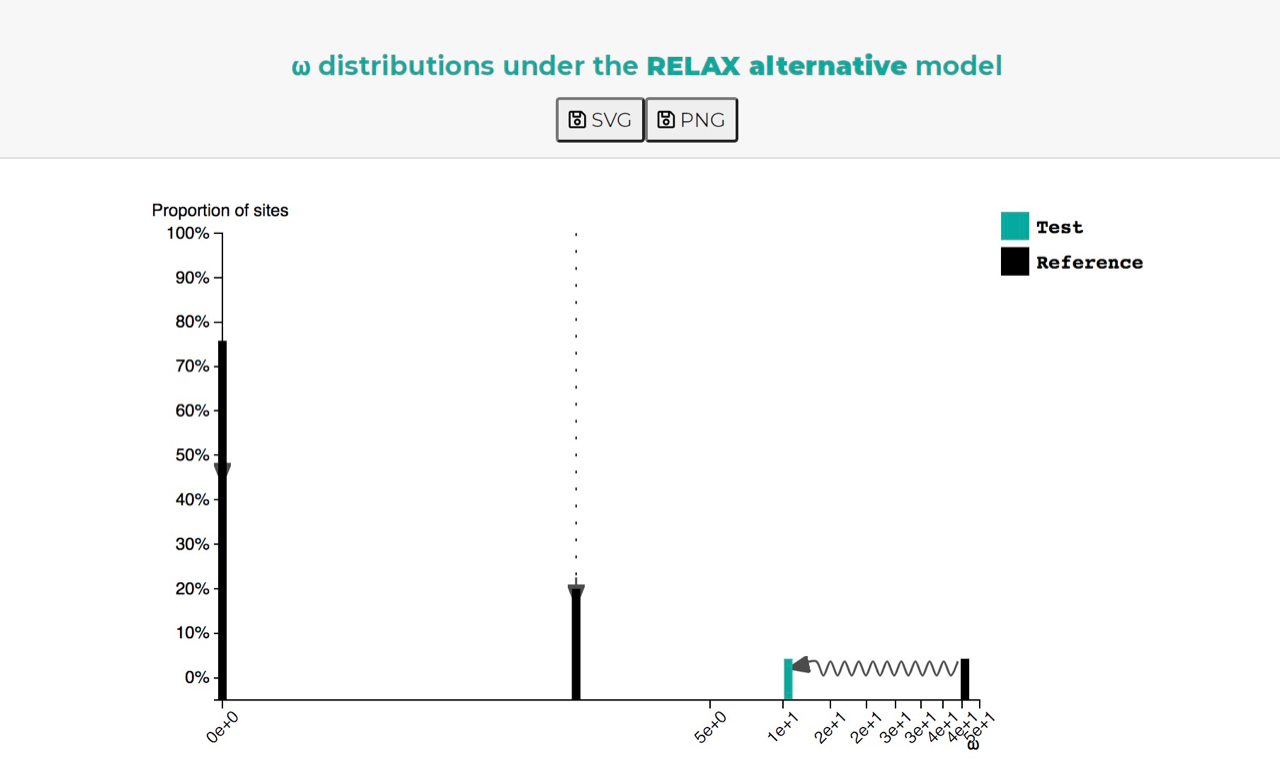


**Alpha12**: selection intensification was significant (K = 1.21, LR = 40.39, p = 0.000) as compared to *Alphapapillomavirus*


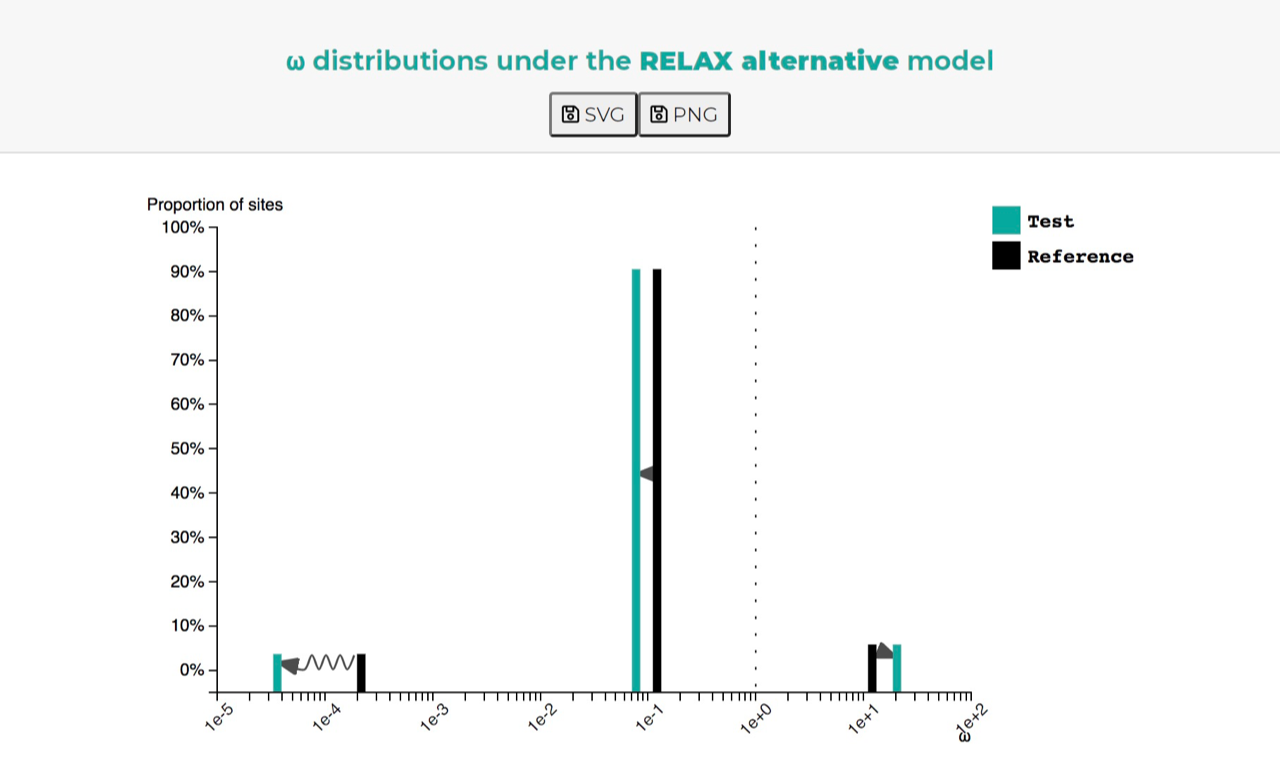


**Alpha12**: selection intensification was significant (K = 1.42, LR = 100.12, p = 0.000) as compared to other mucosal clade close relatives (HR+LR1)


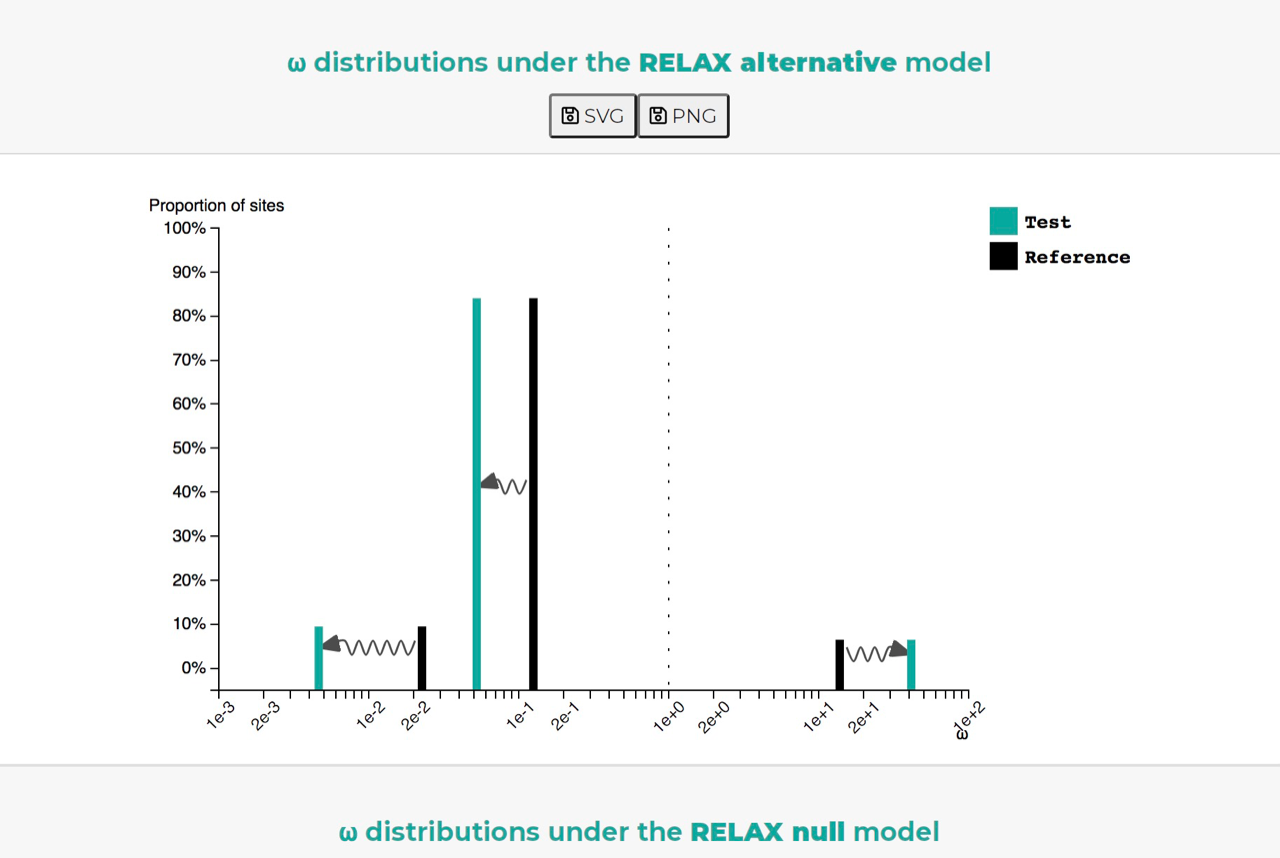

Supplement: Supplementary file 1 [file supplementary]
