# Supplementary figures and images for: Genetic Drift and <em>Alphapapillomavirus</em> Evolution
Source: Preprints.org preprint supplement (doi:10.20944/preprints202306.0020.v1), 2023-06-01

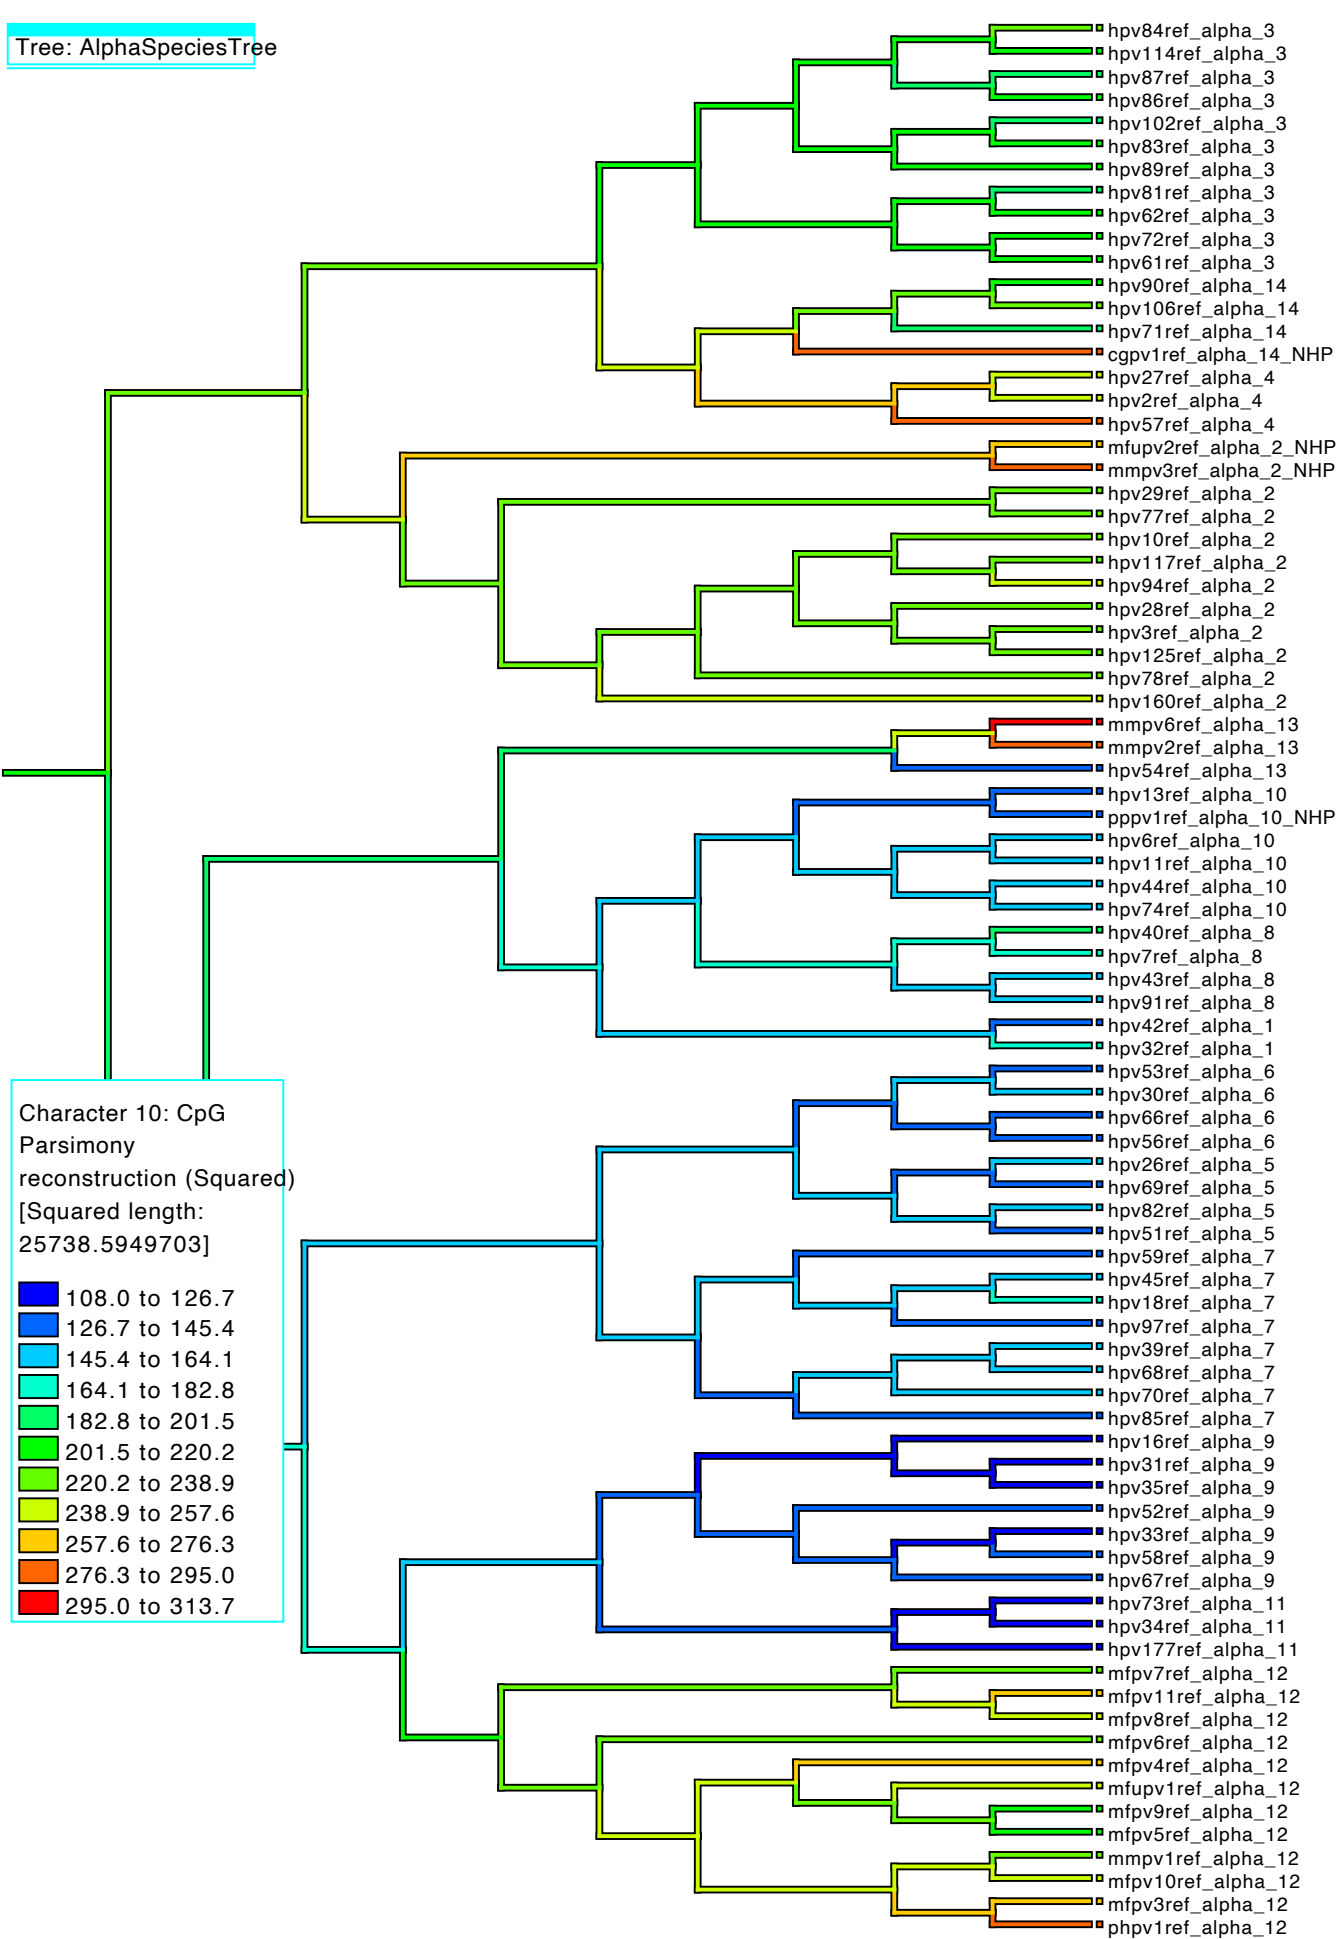

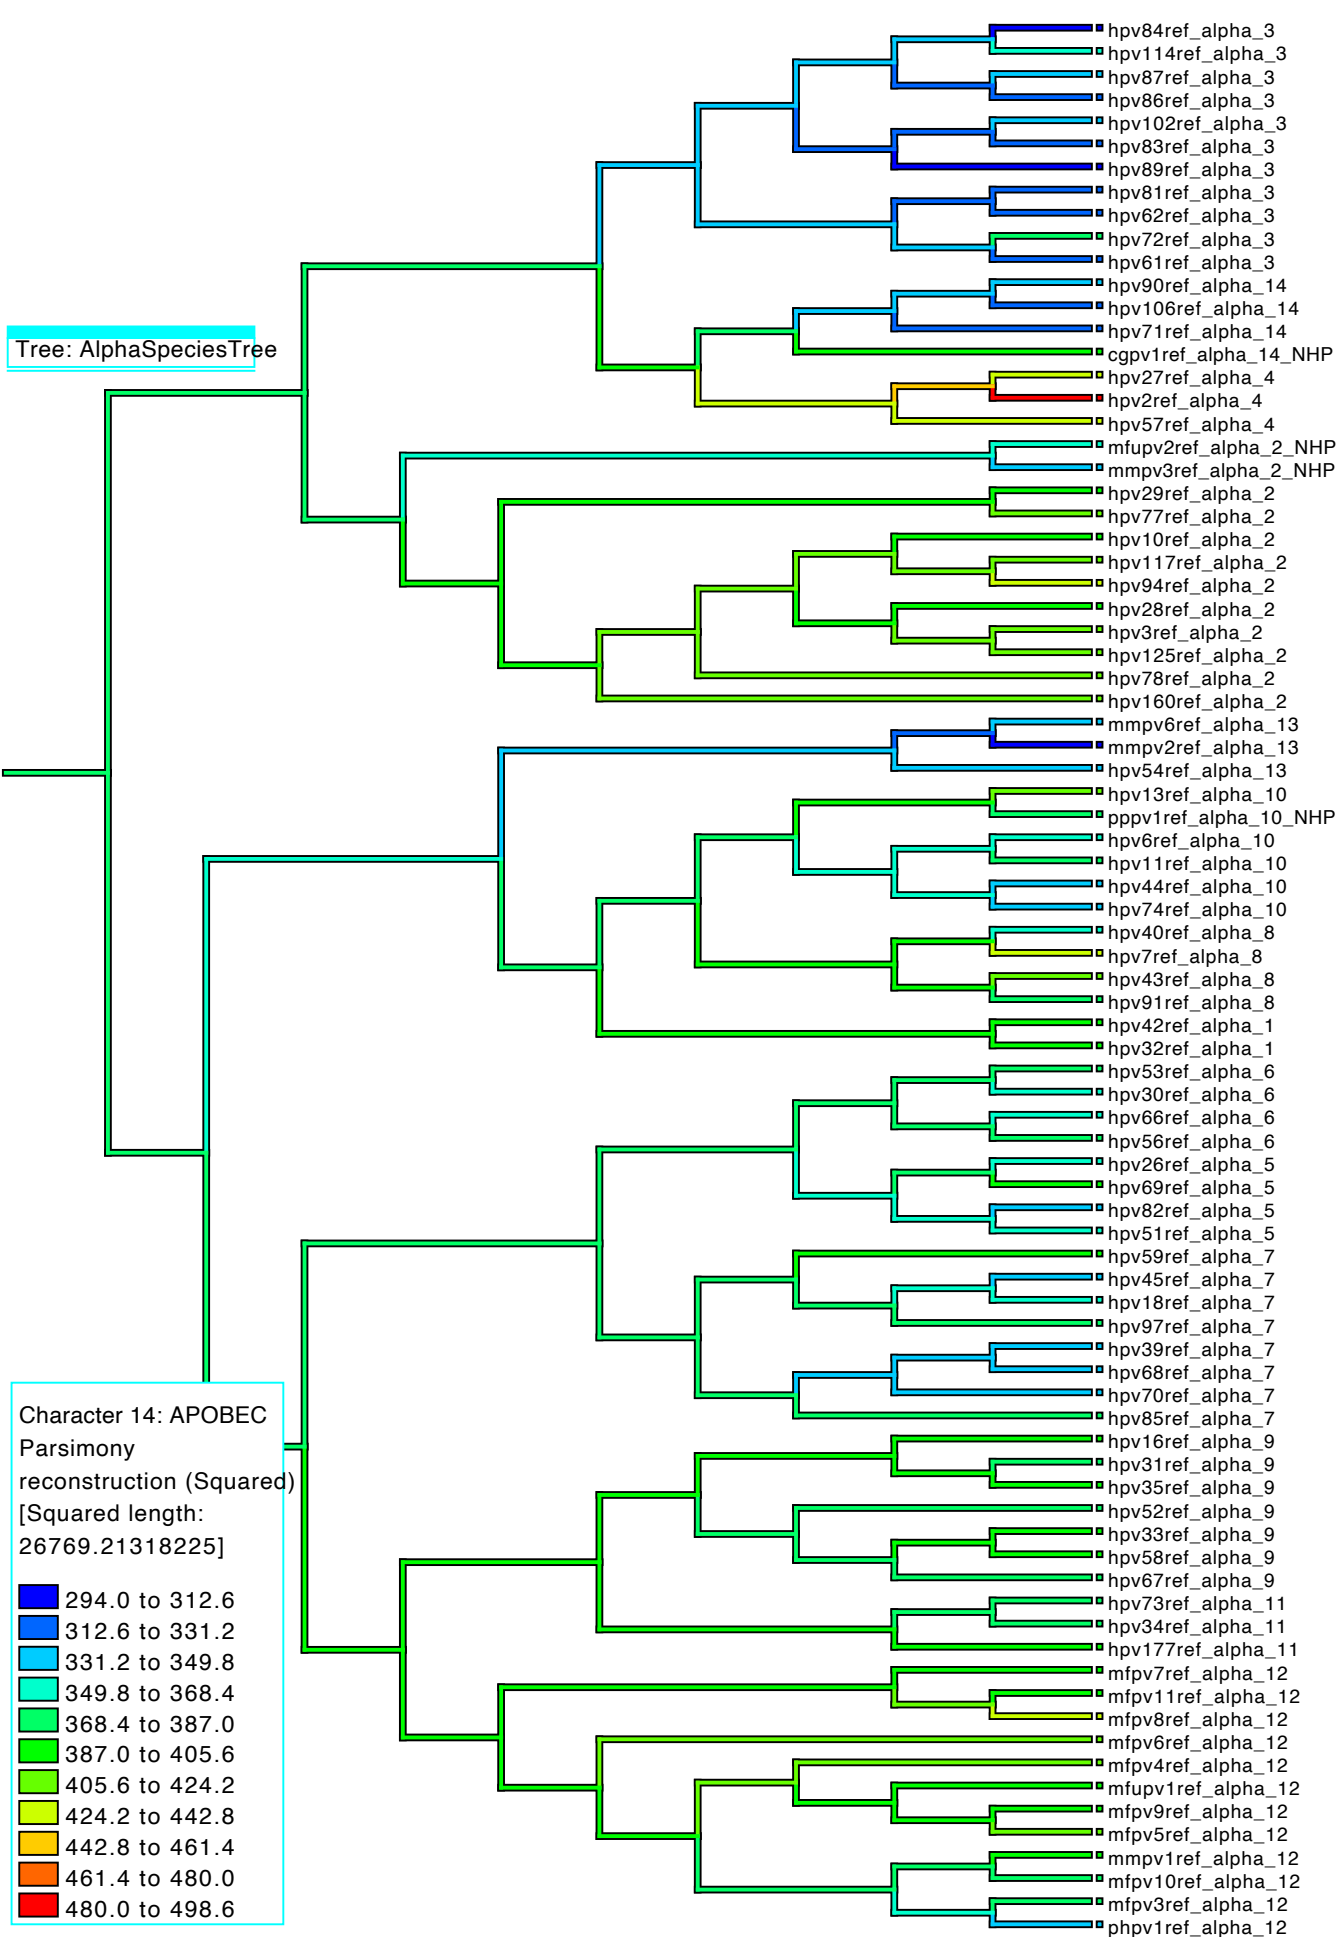

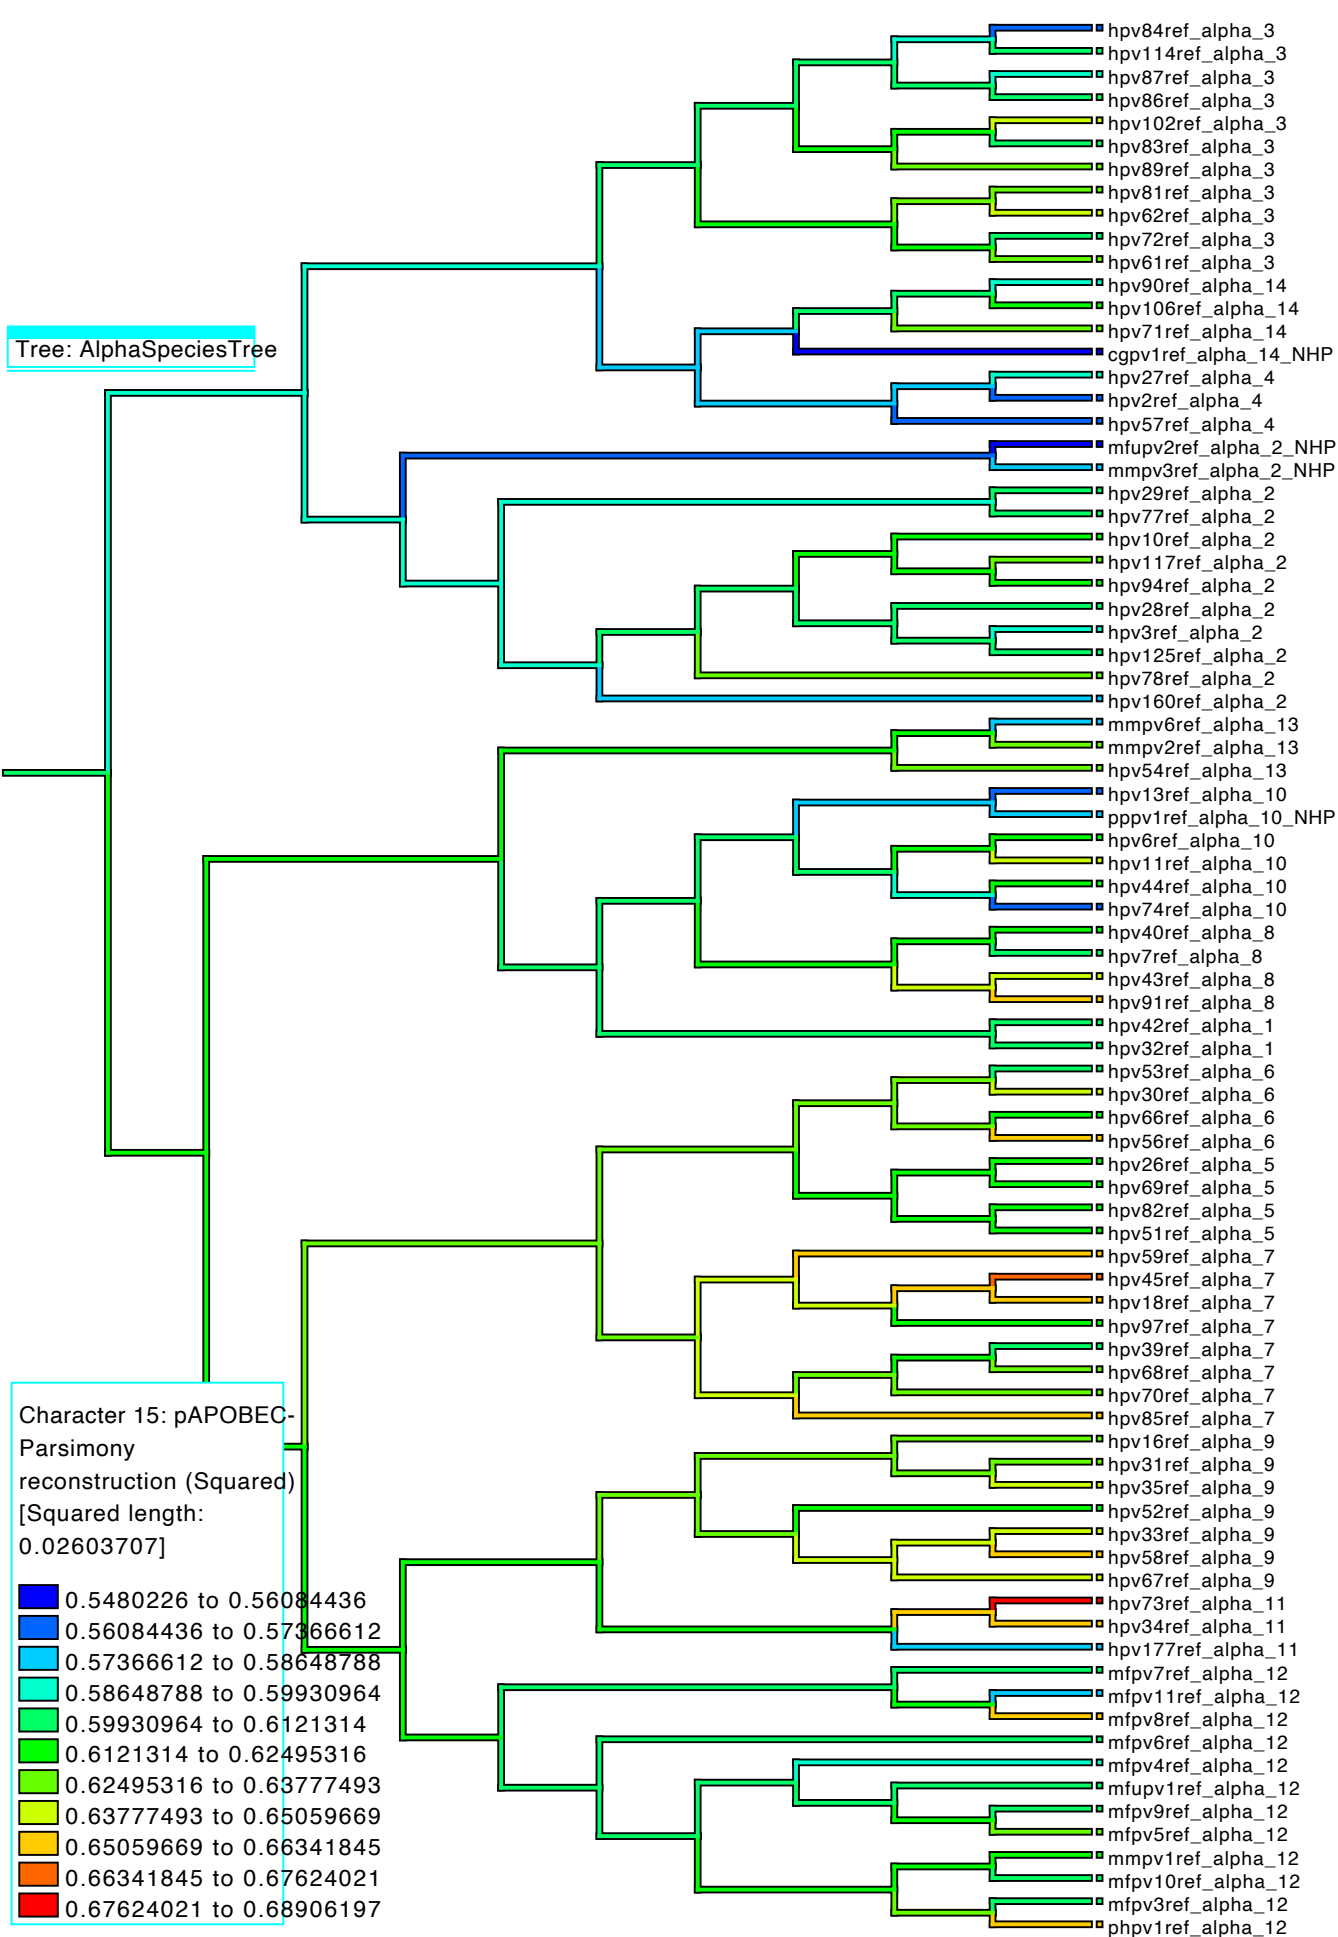

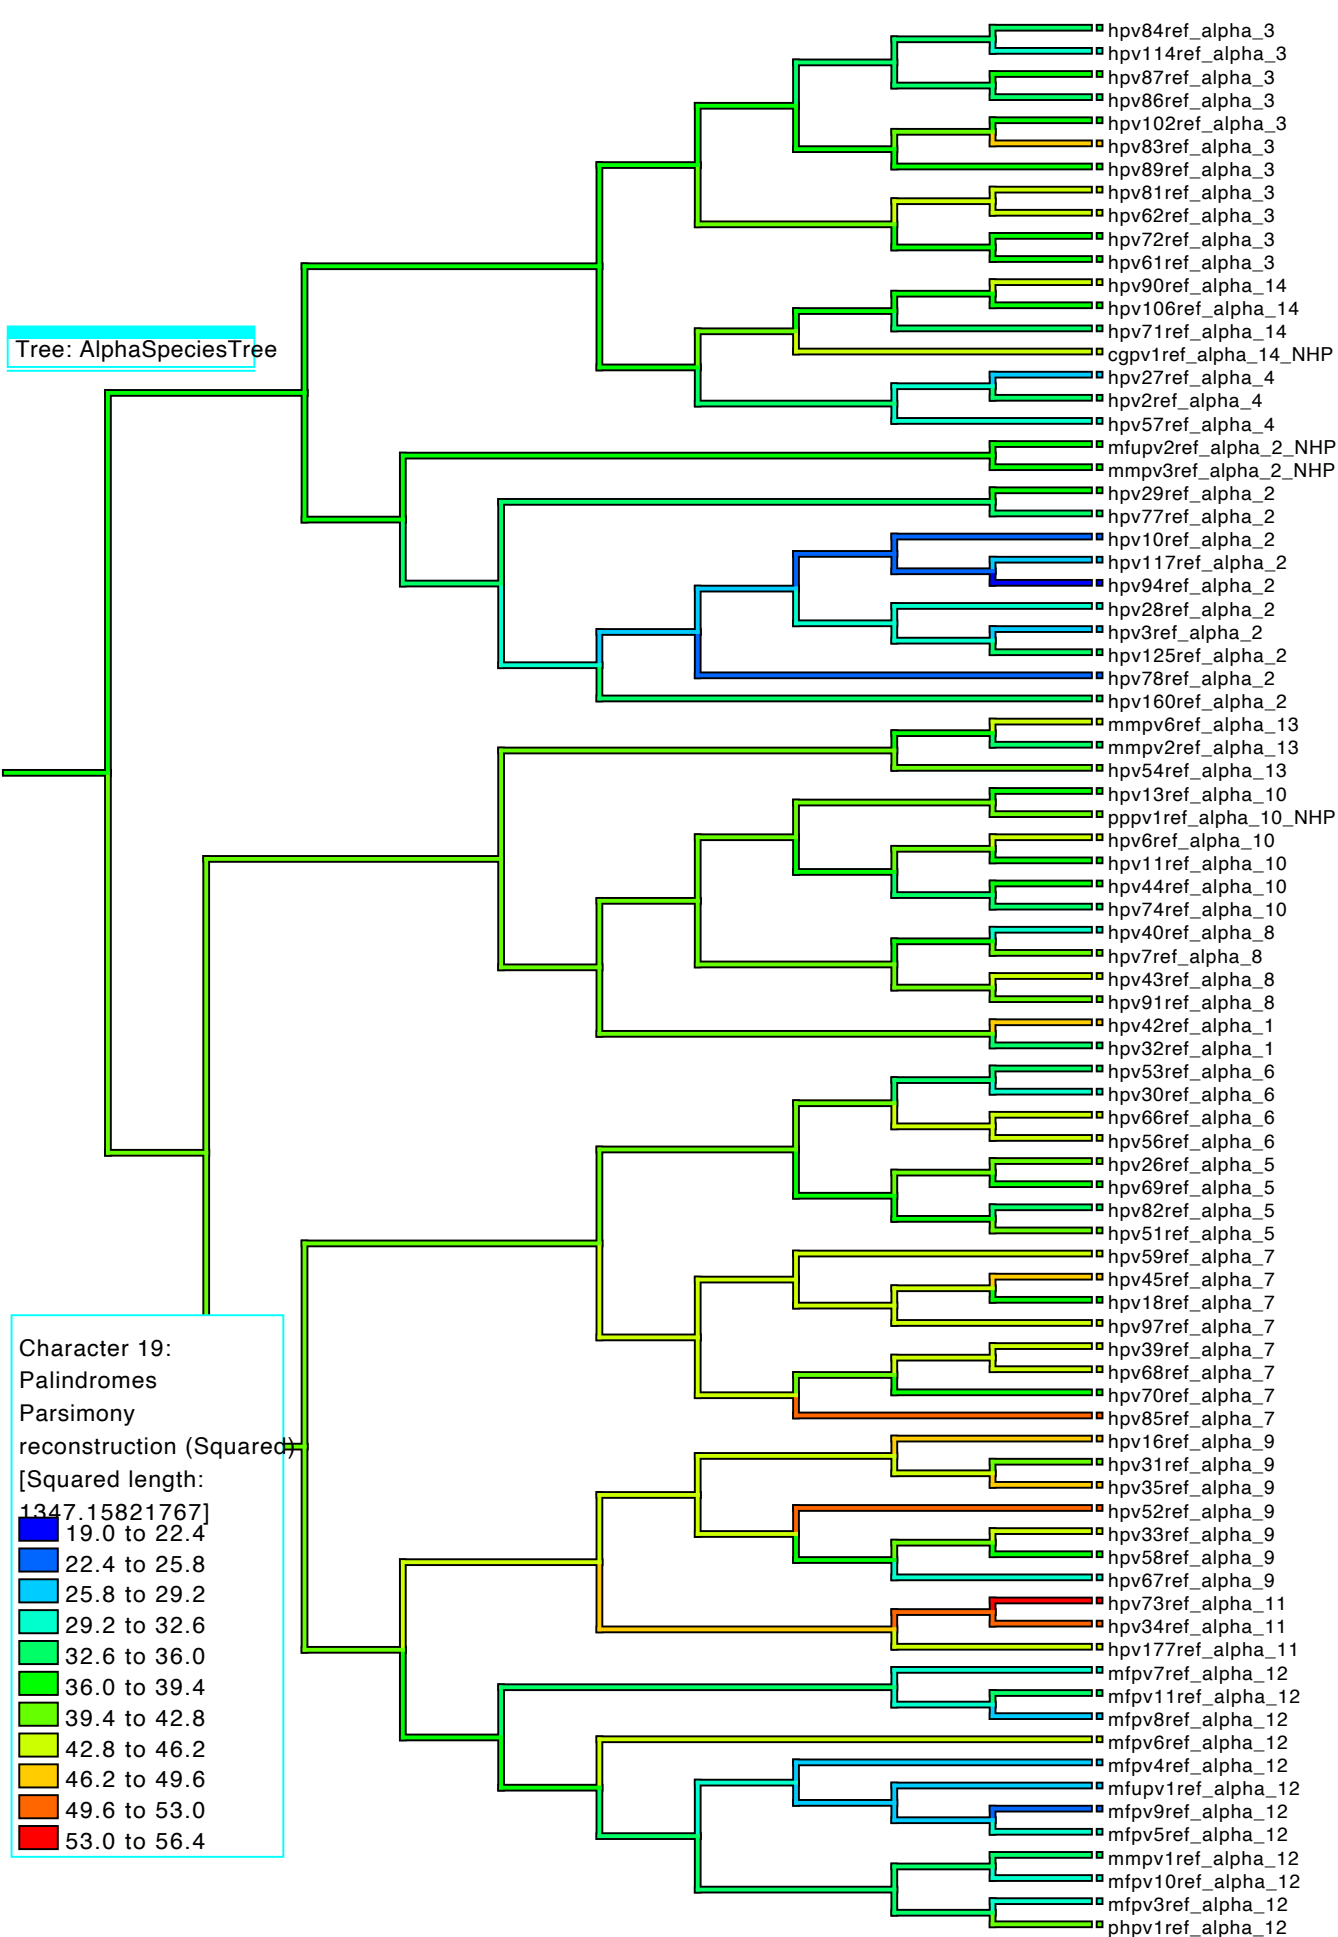

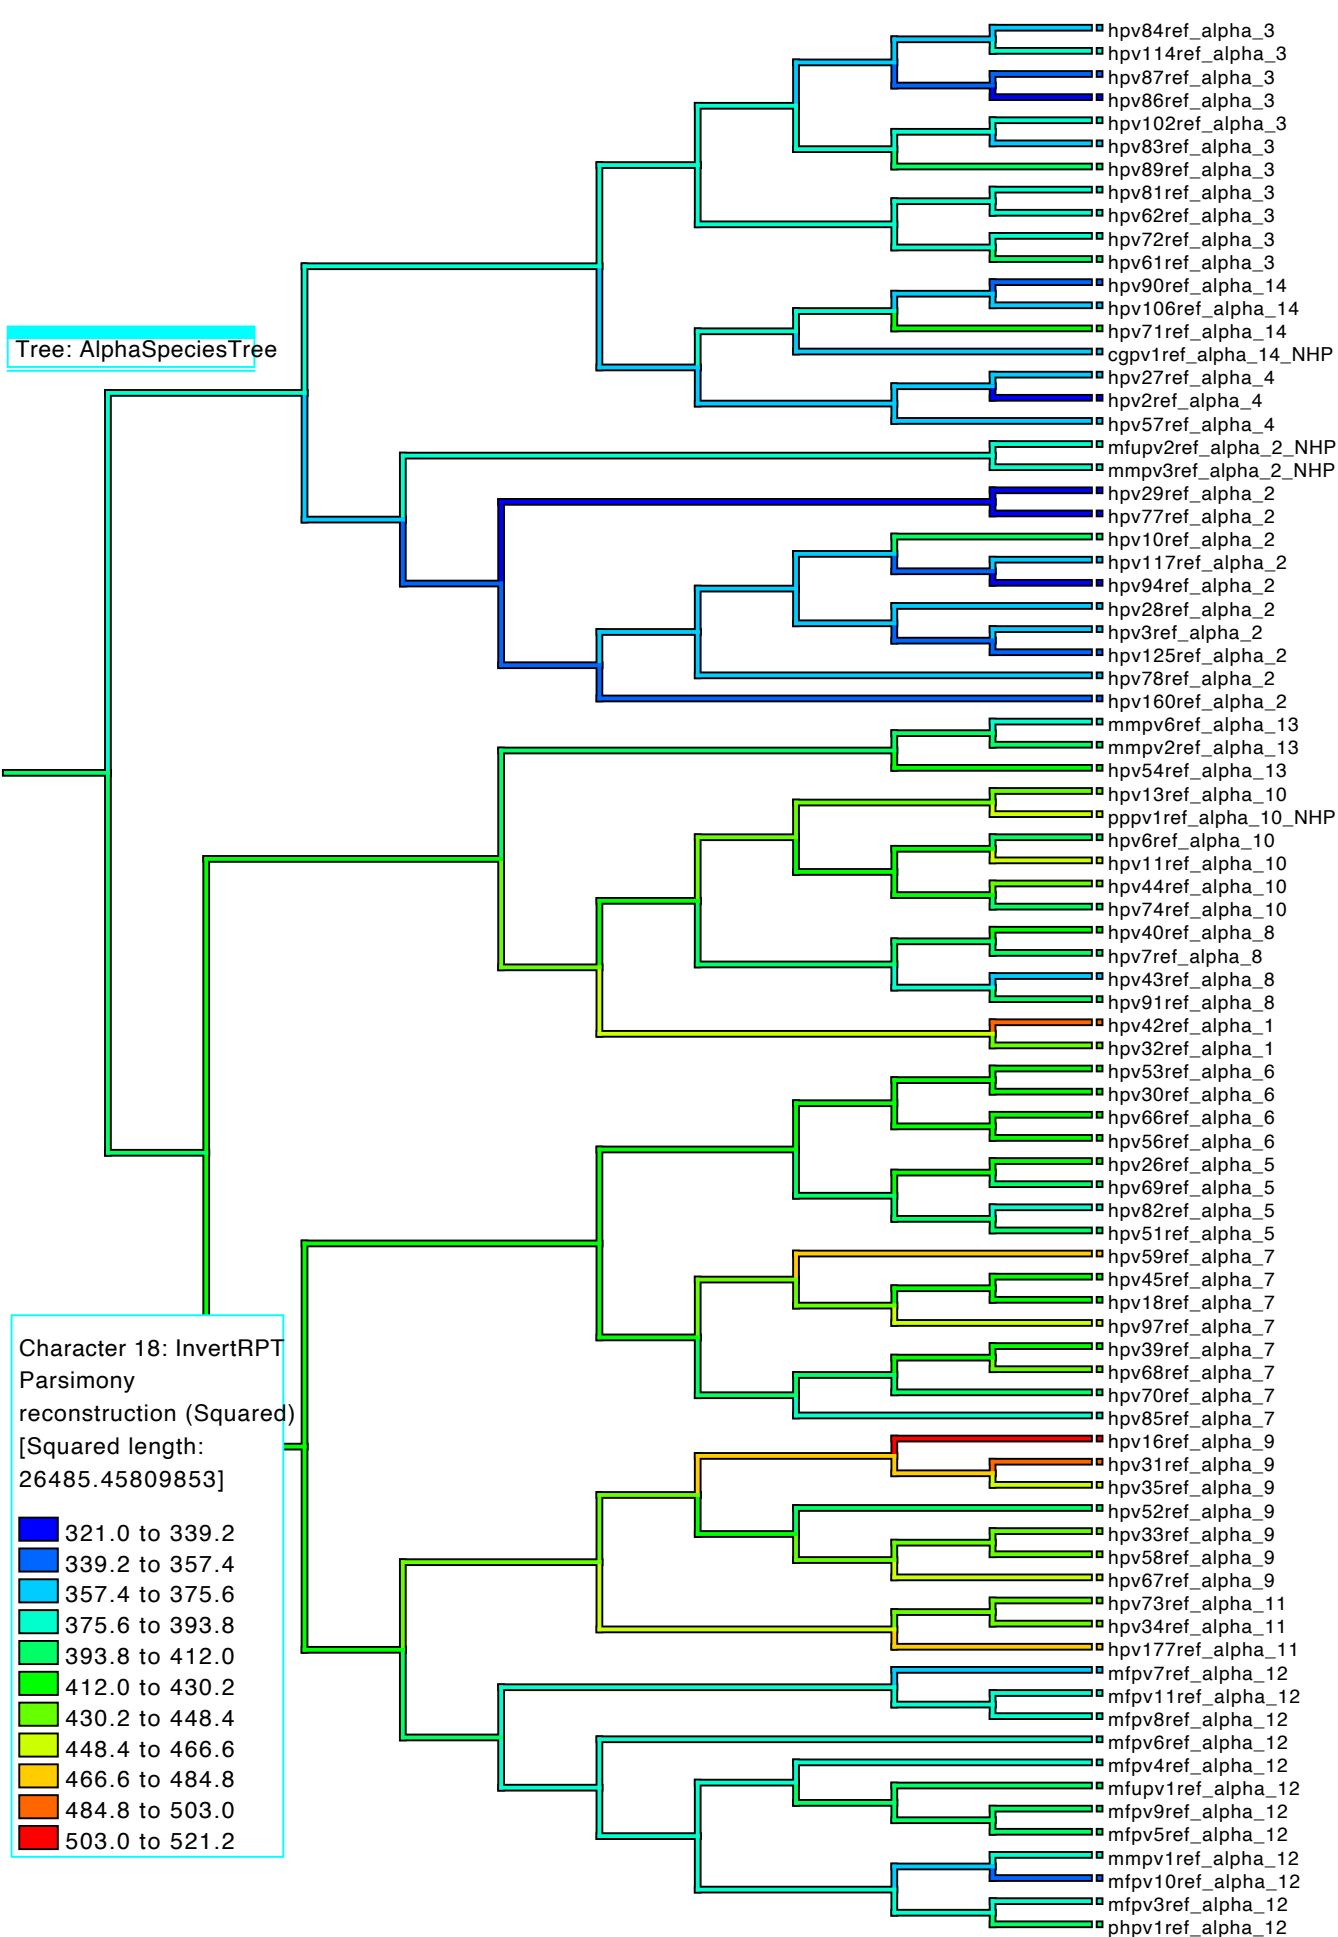

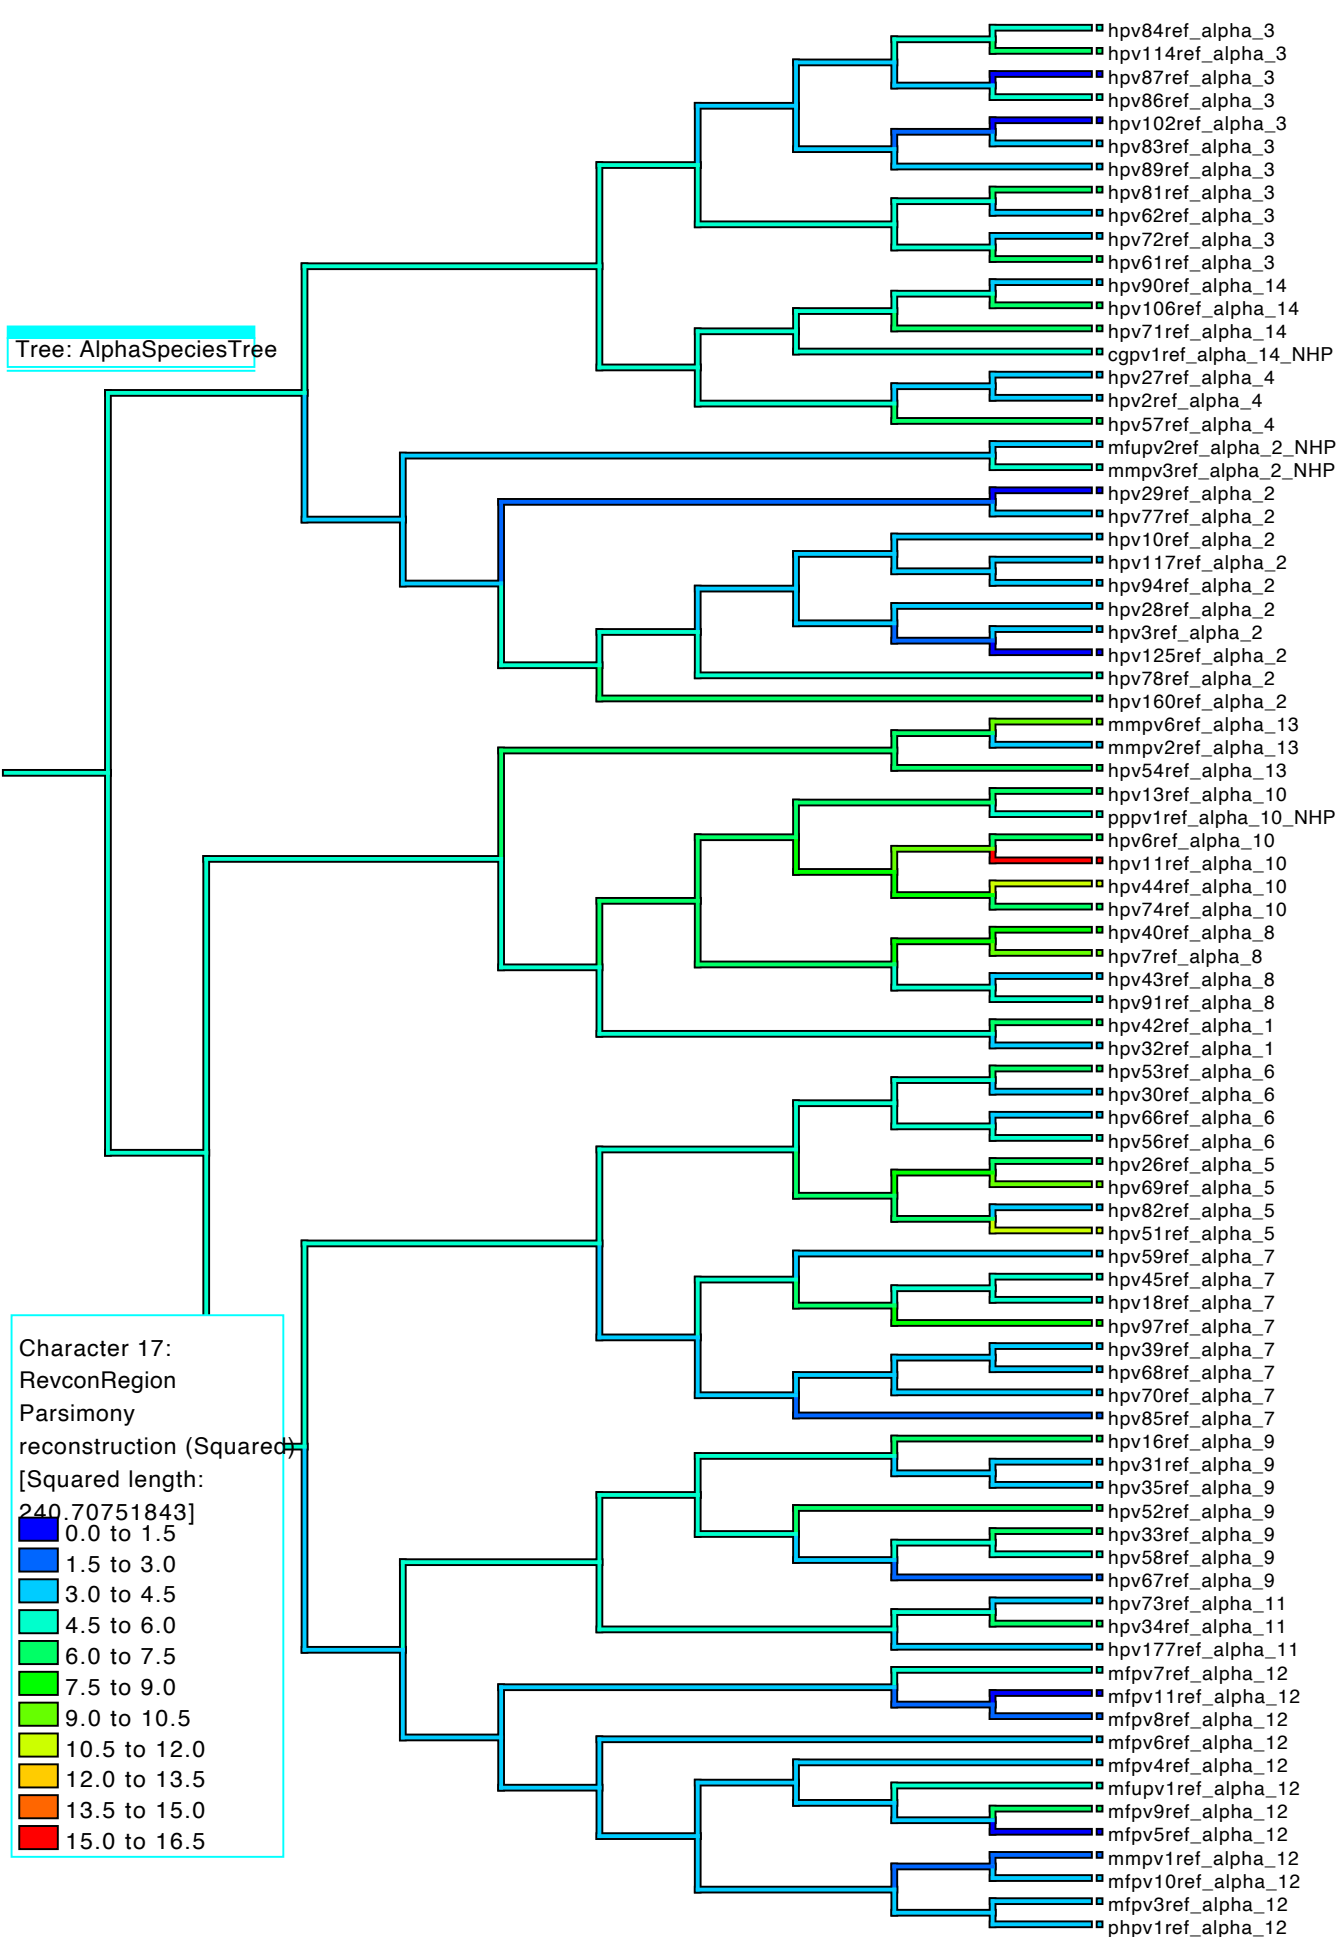

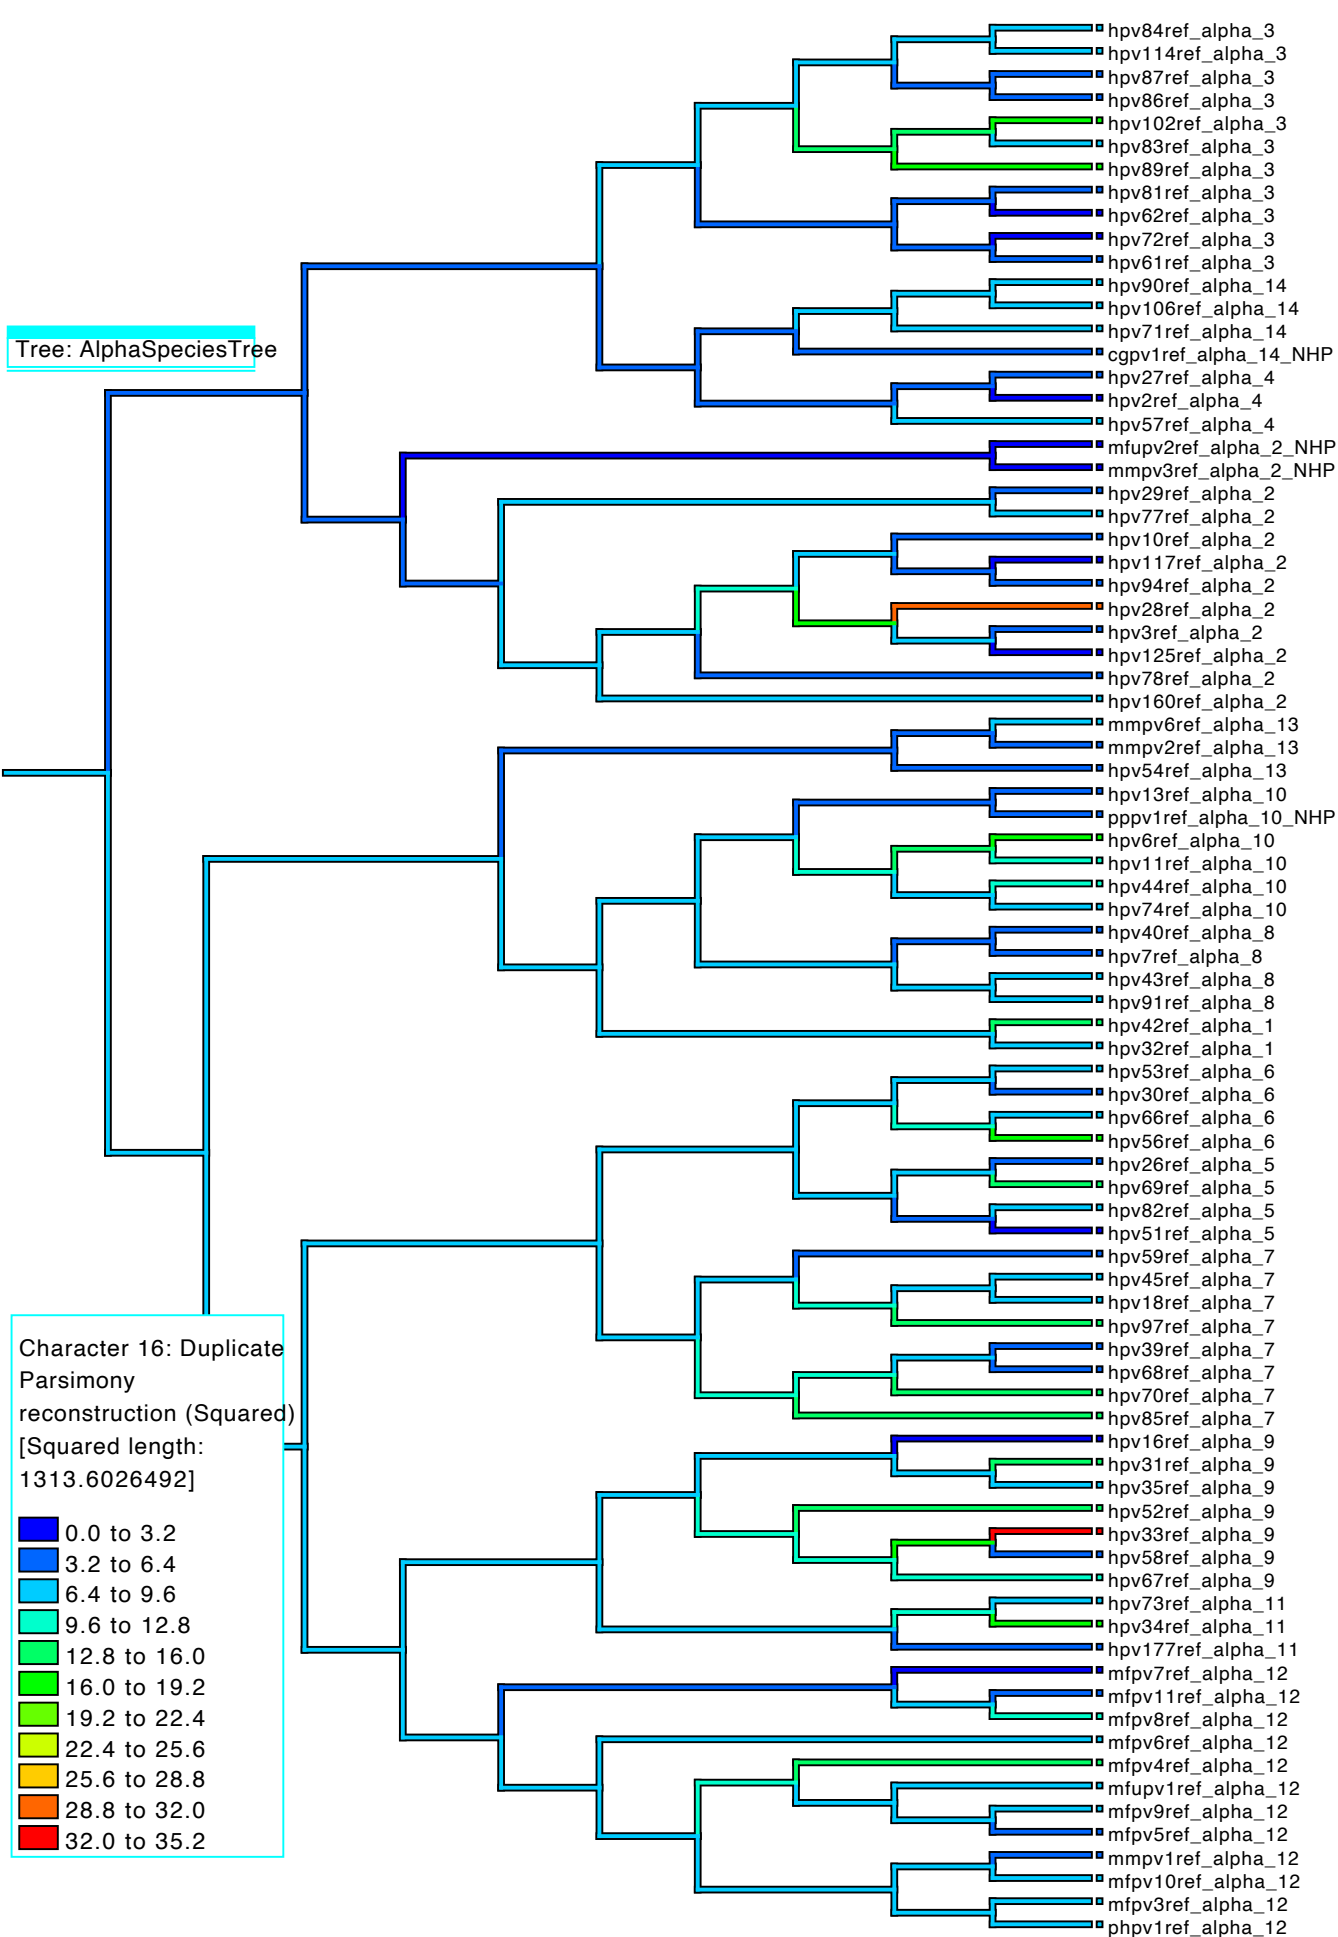

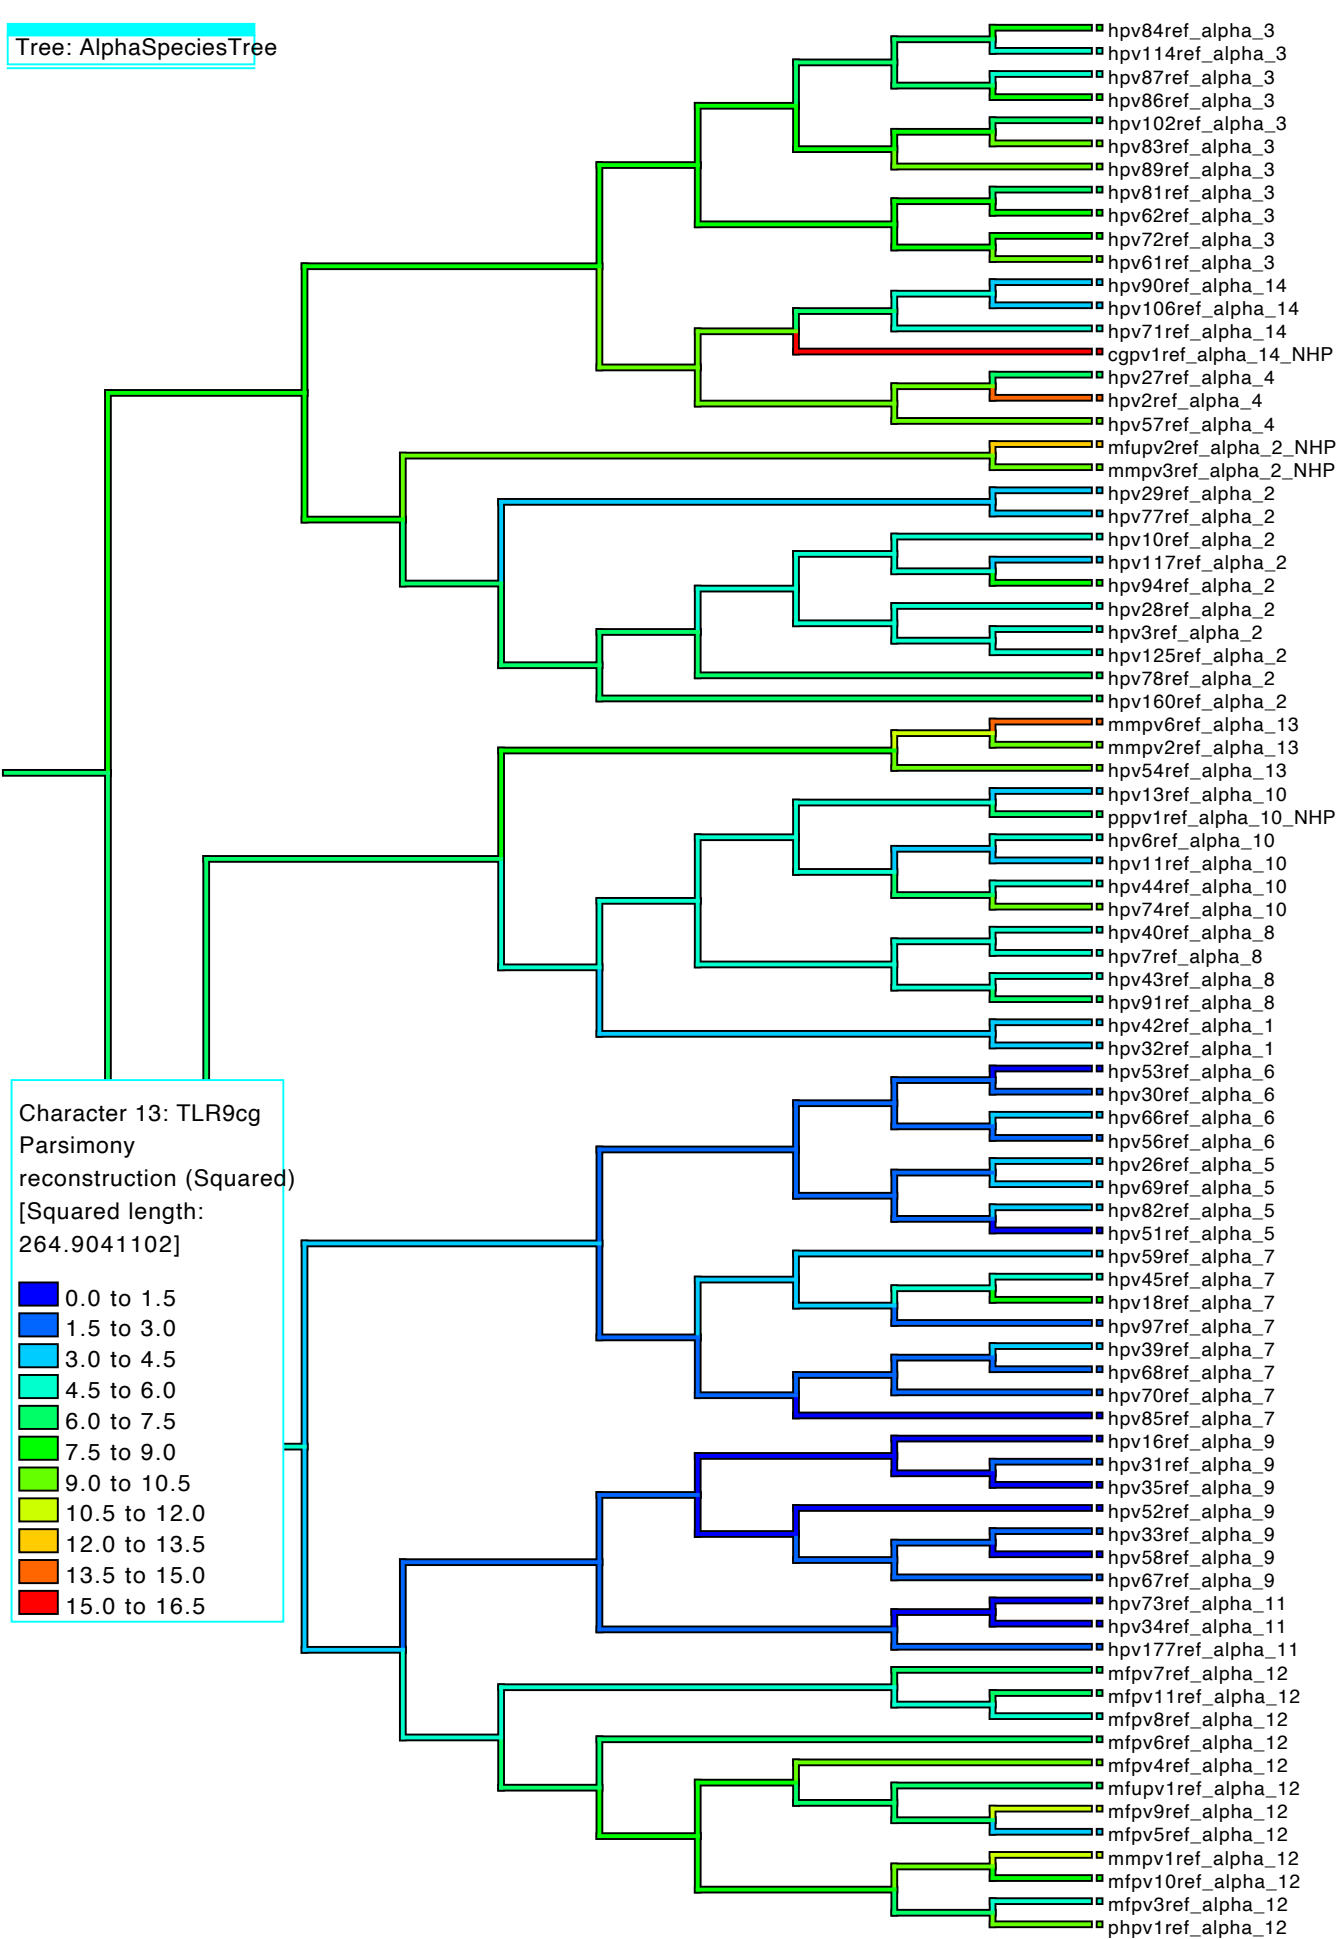



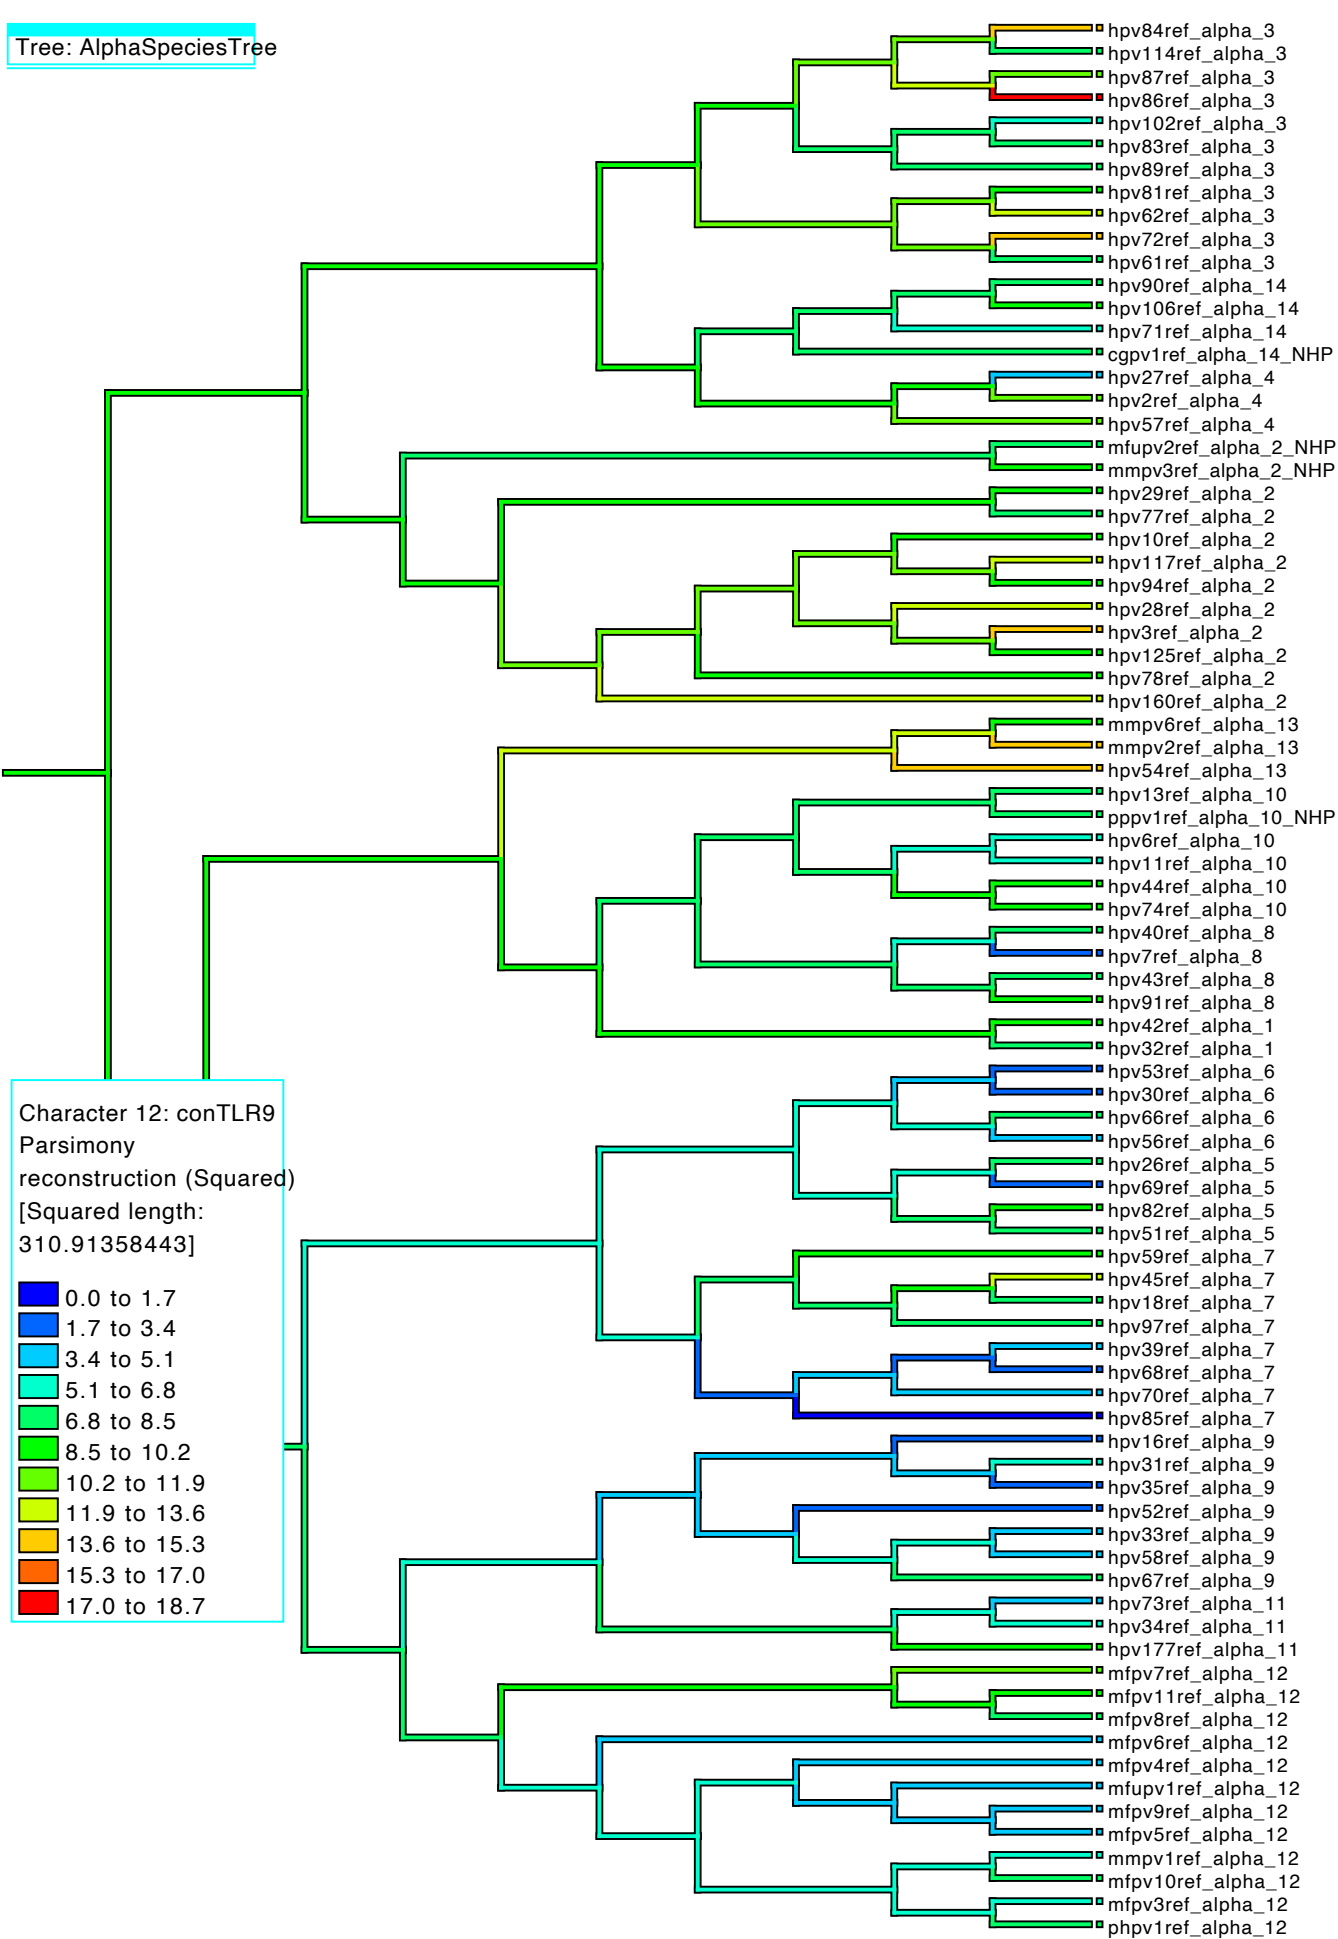

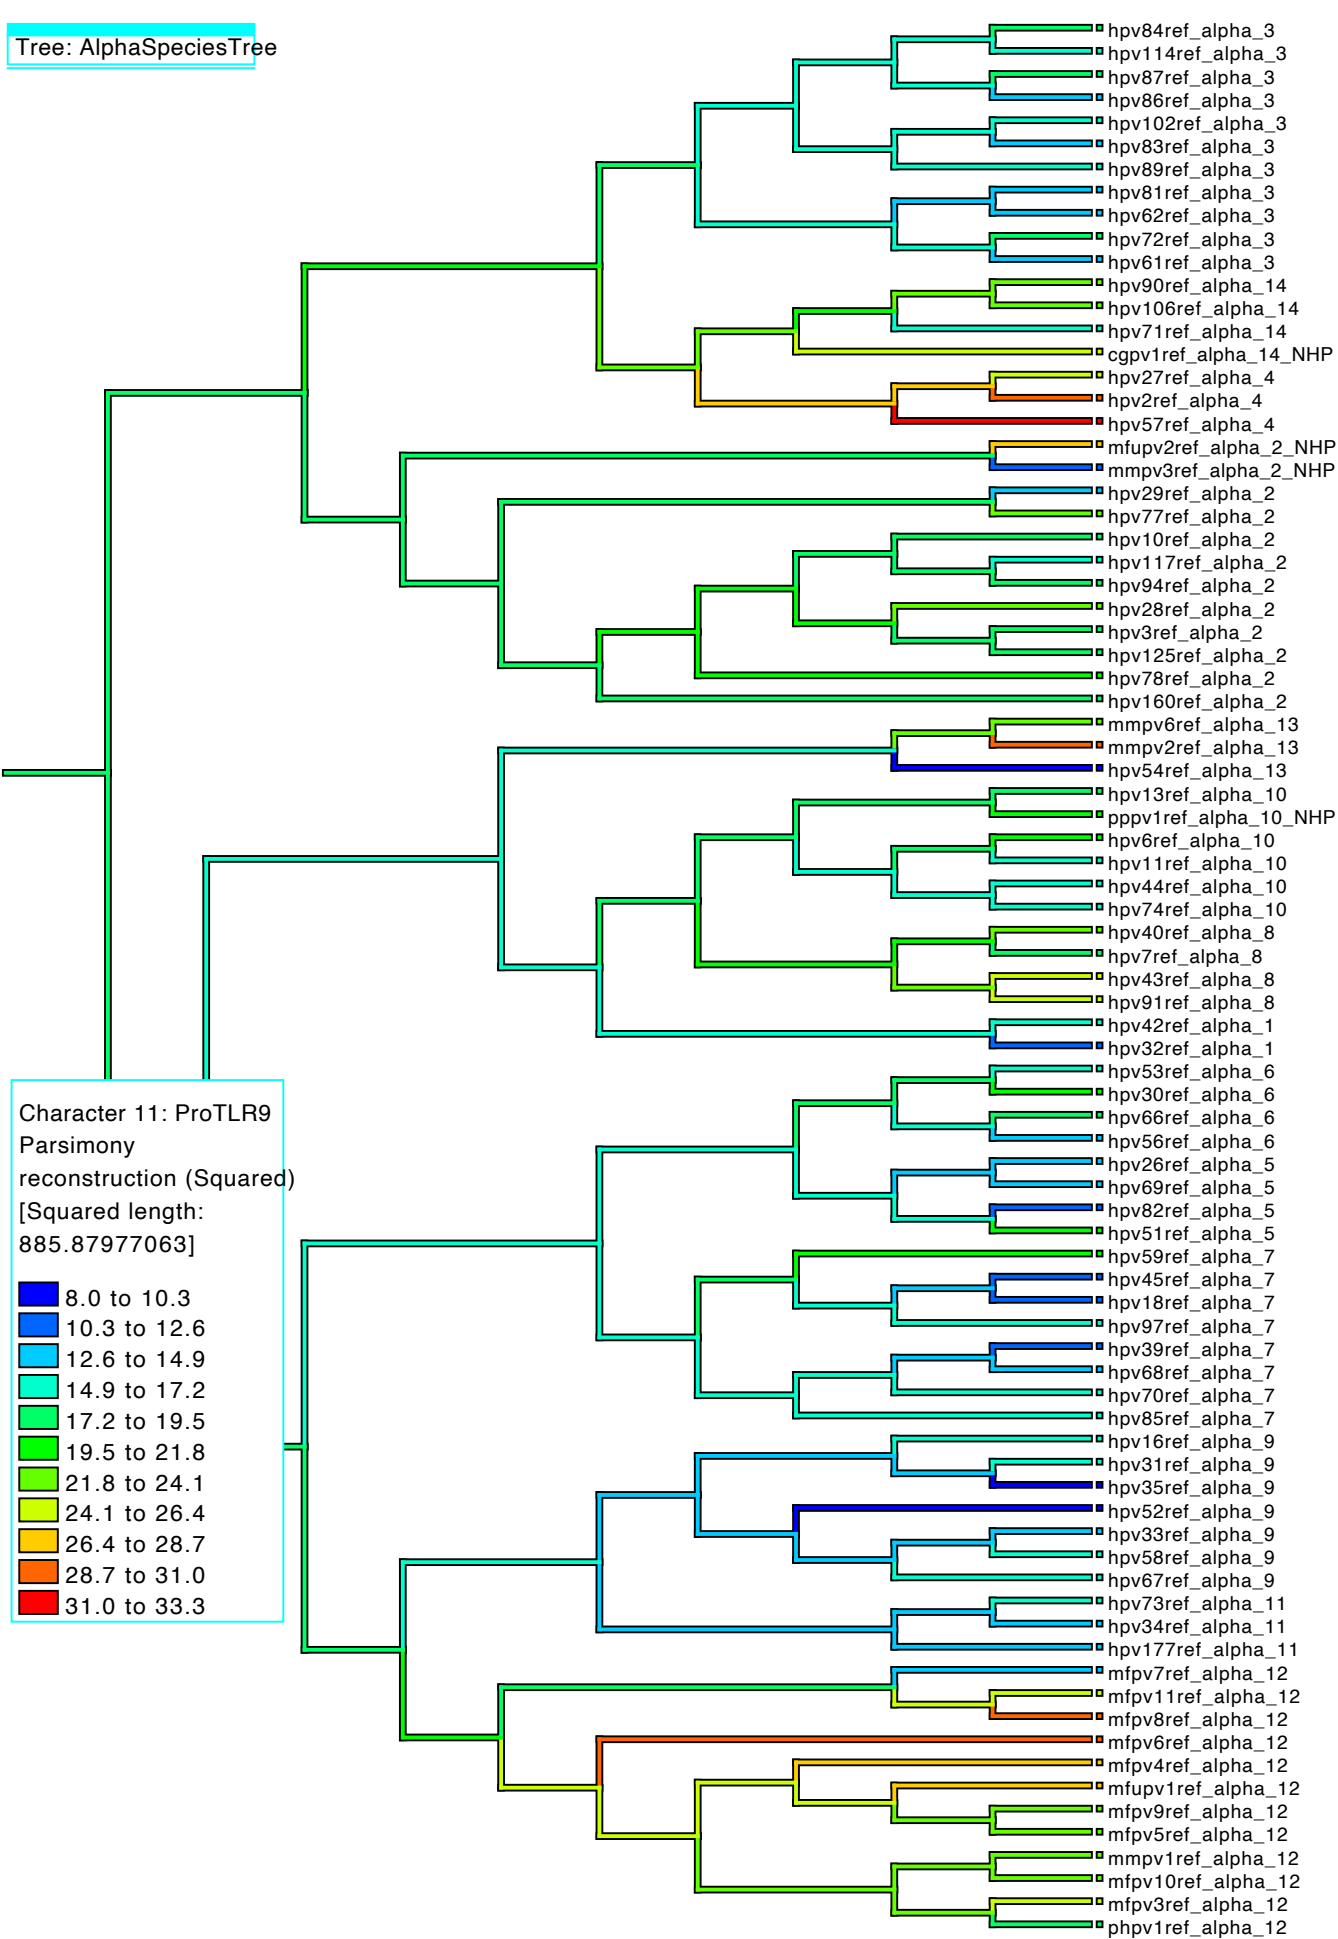

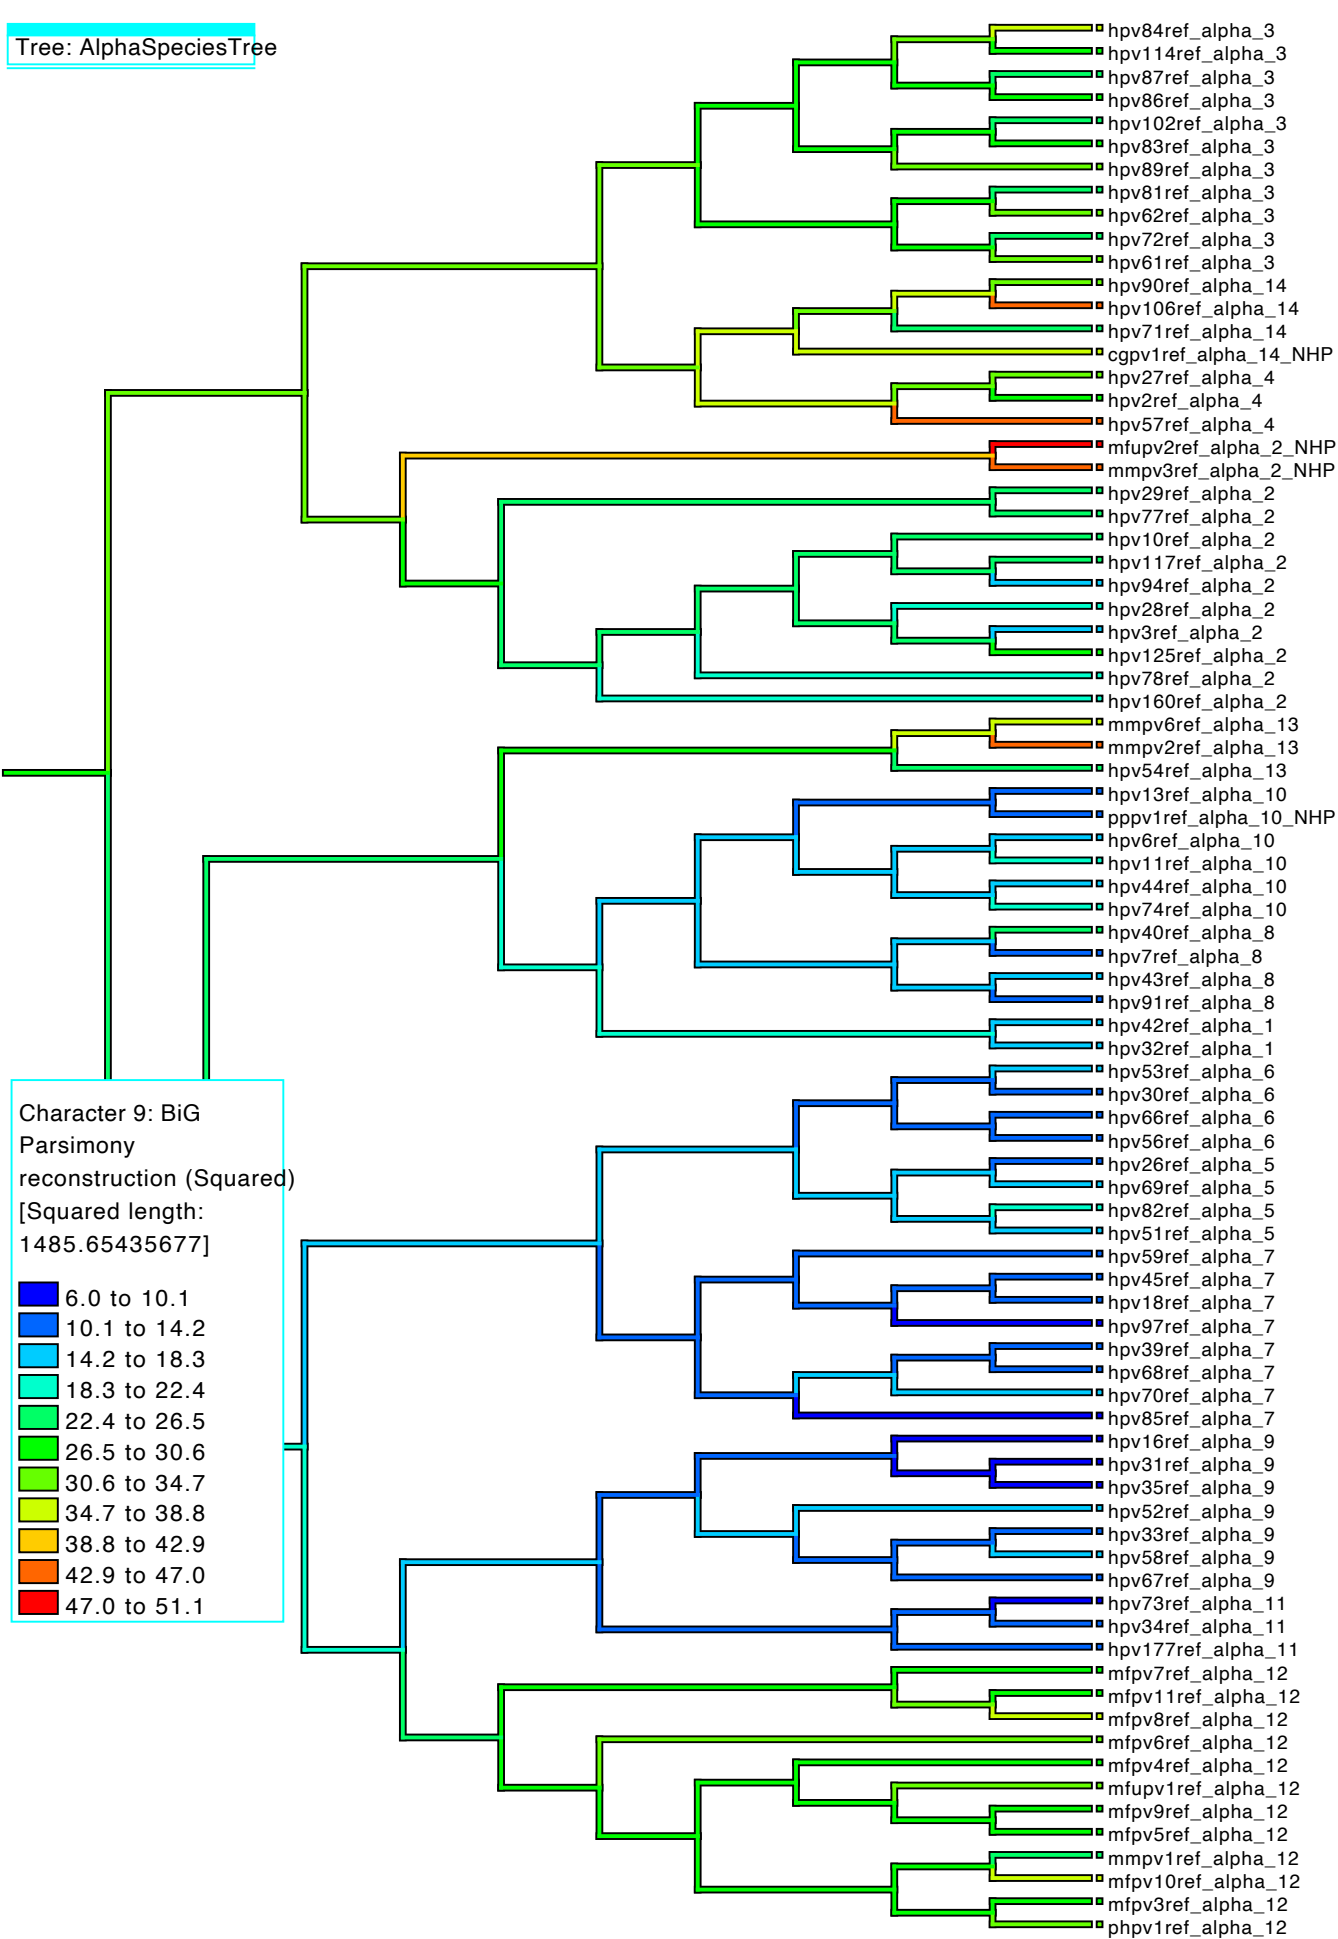

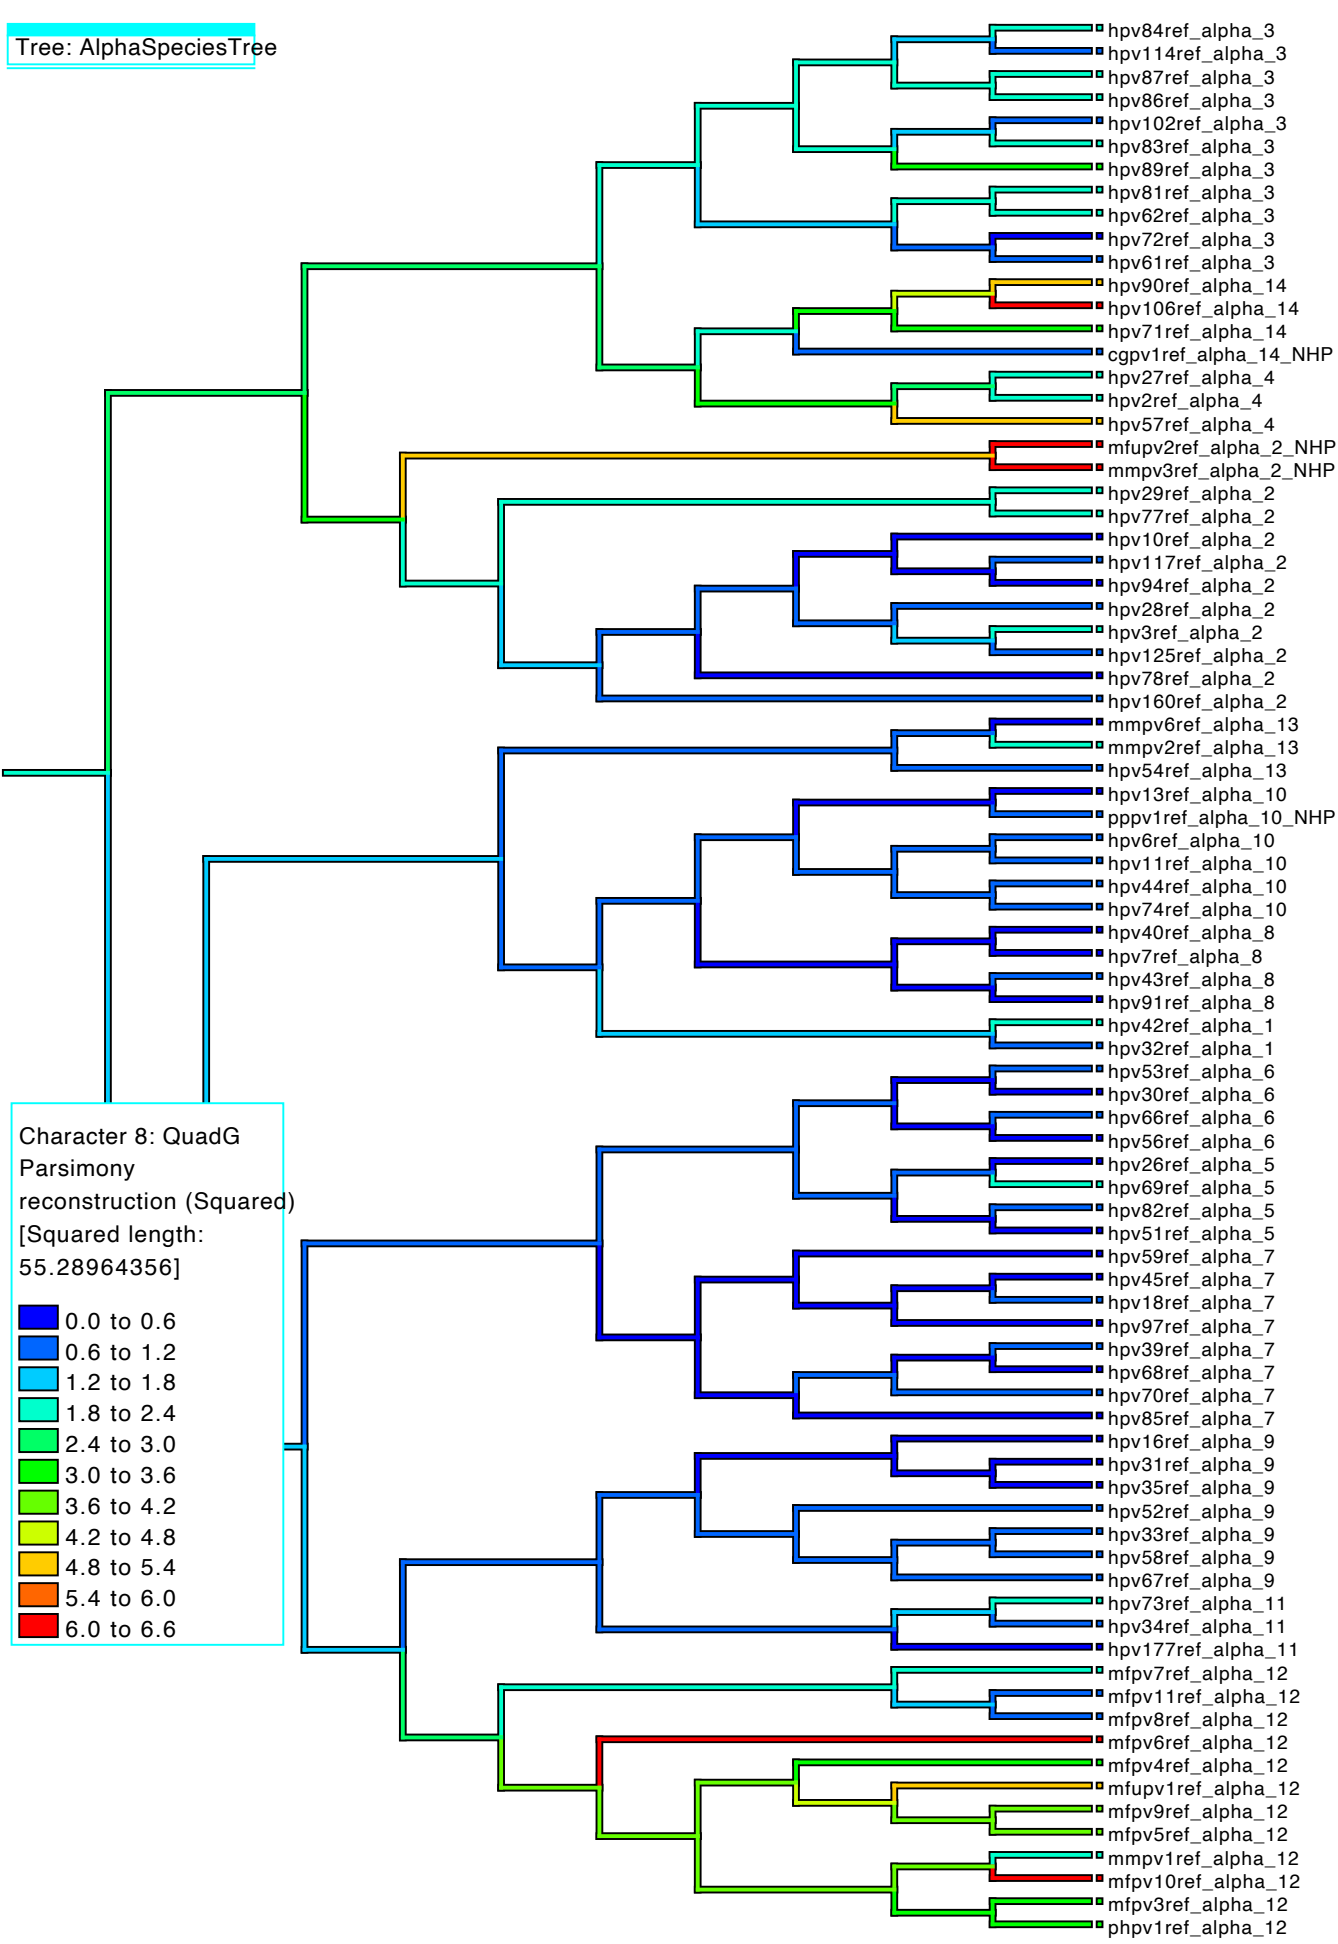

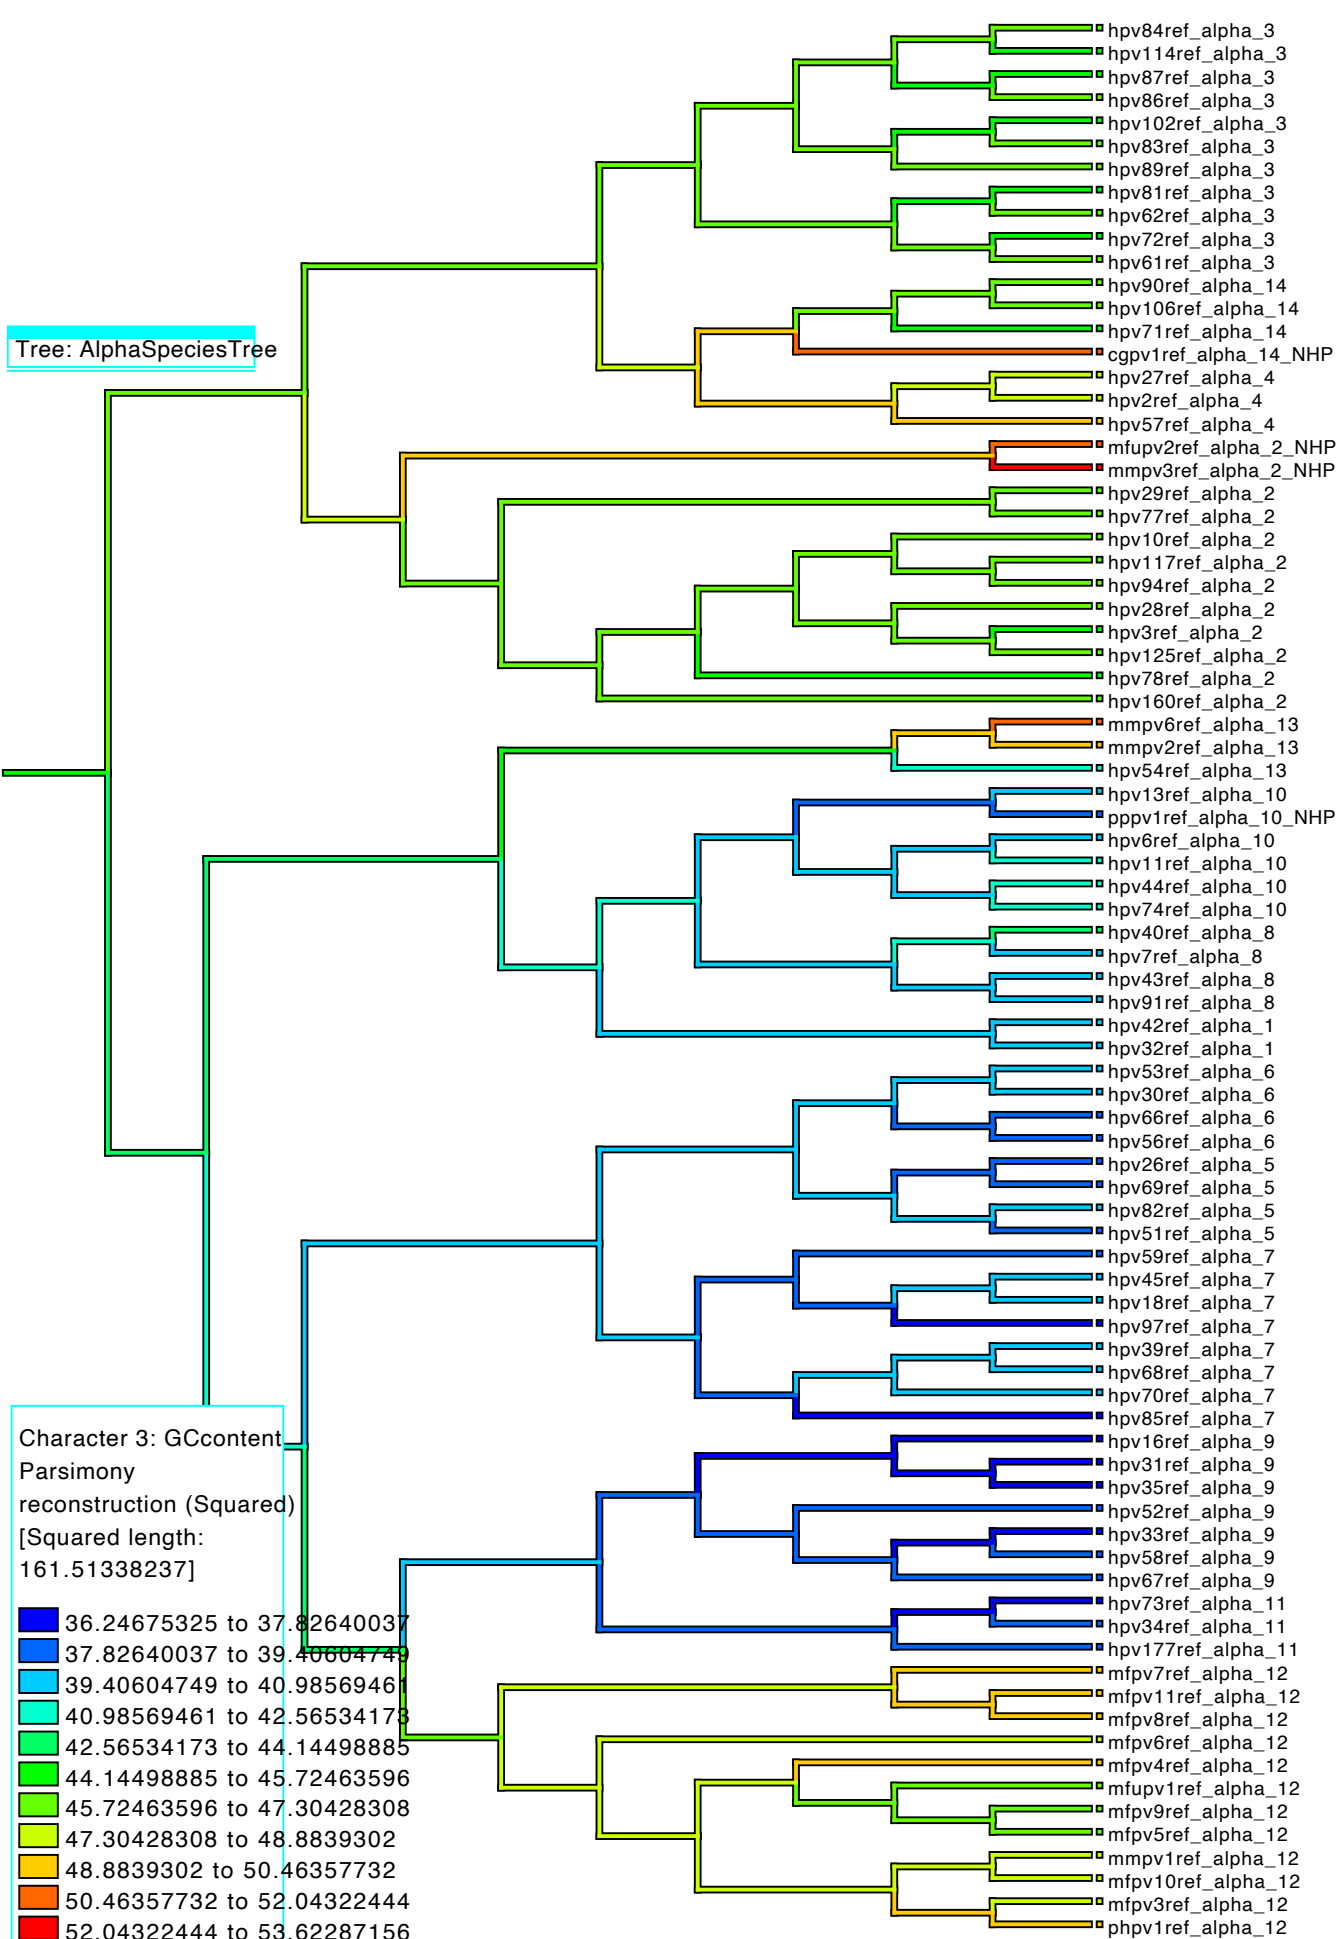

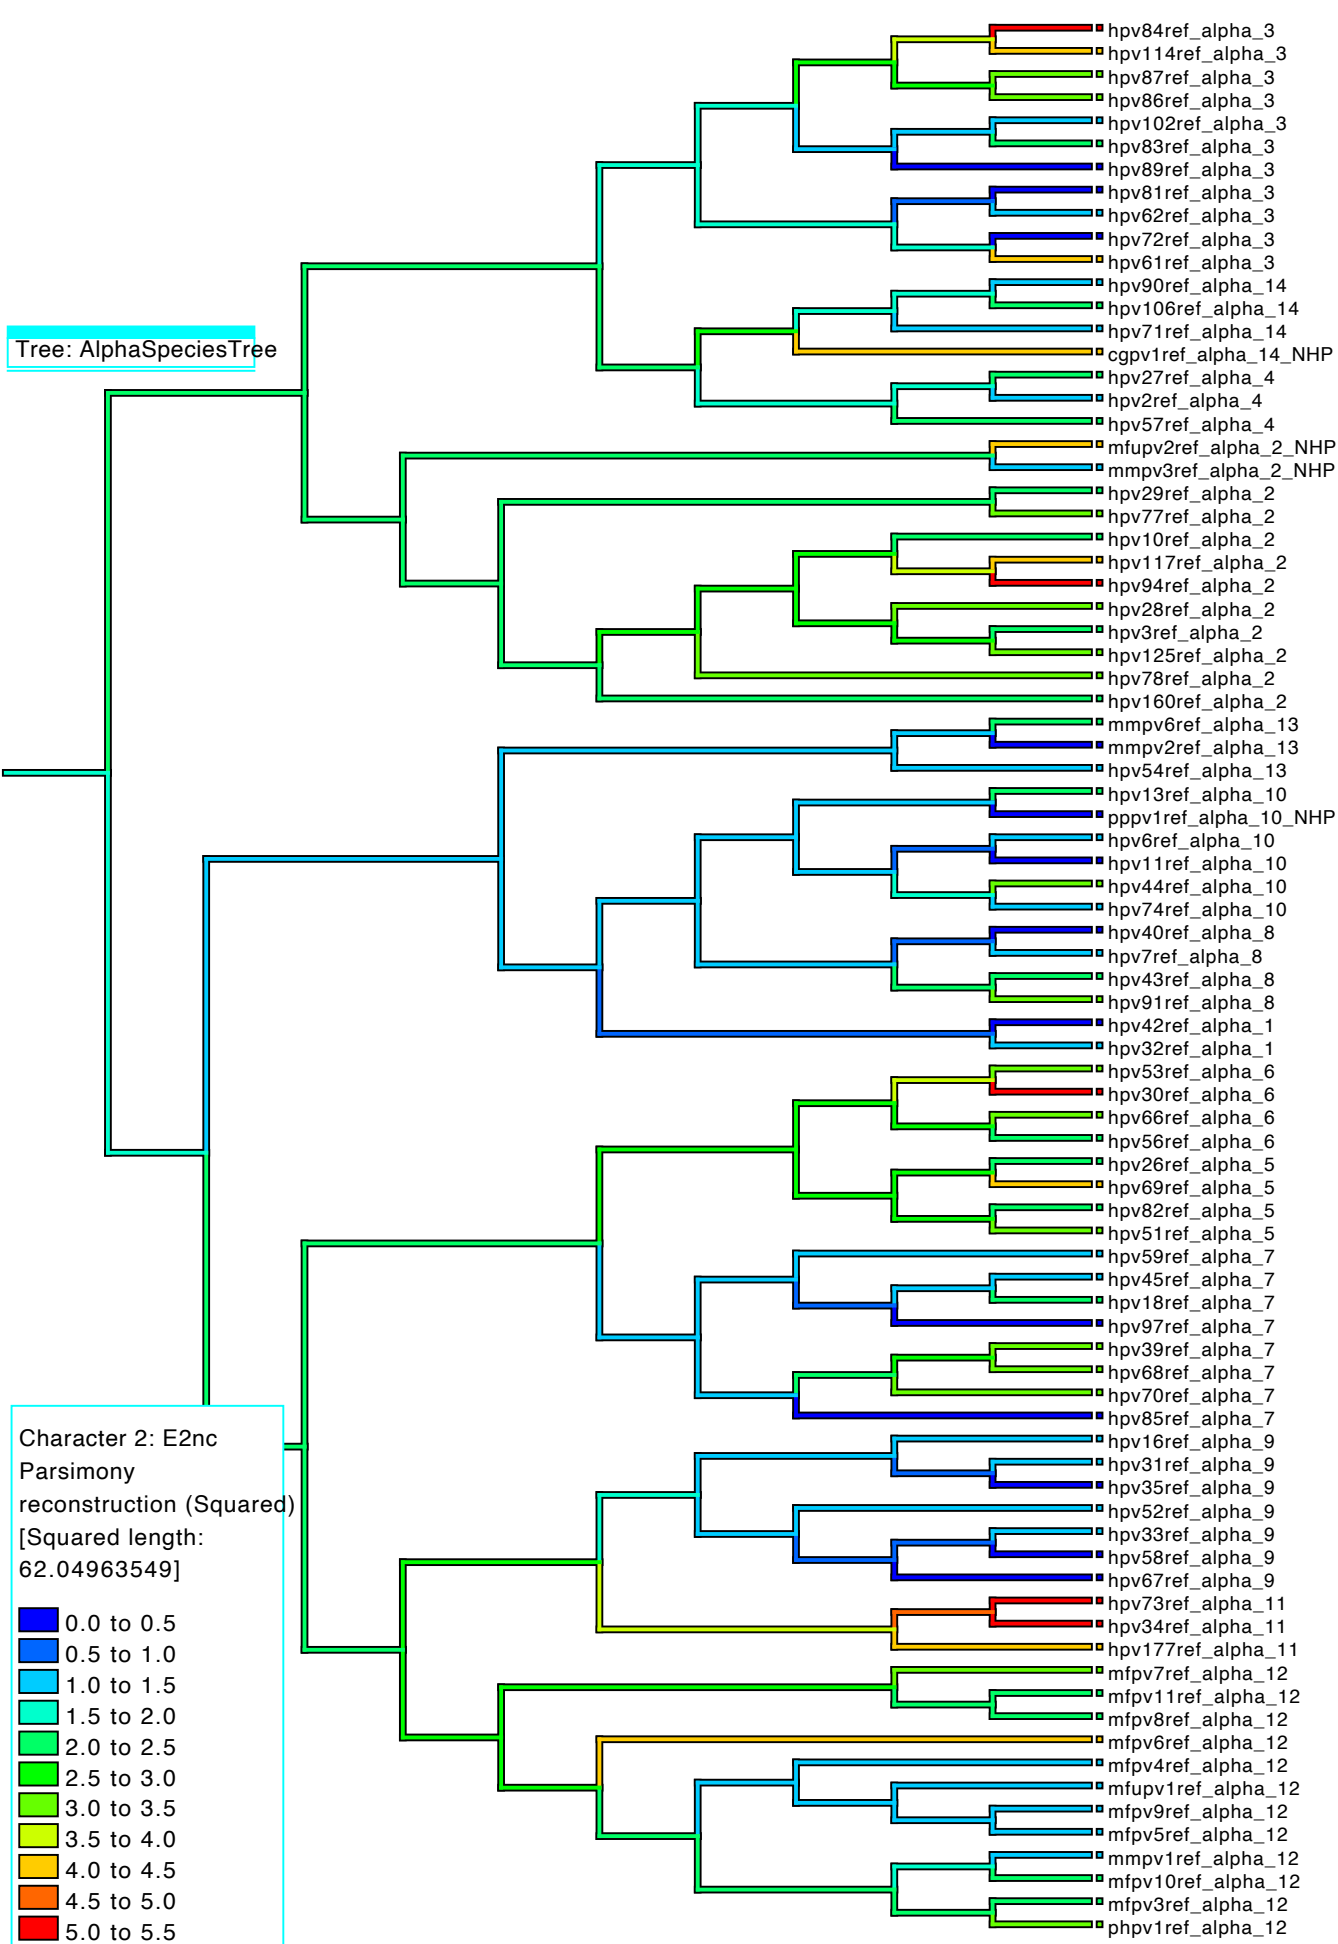

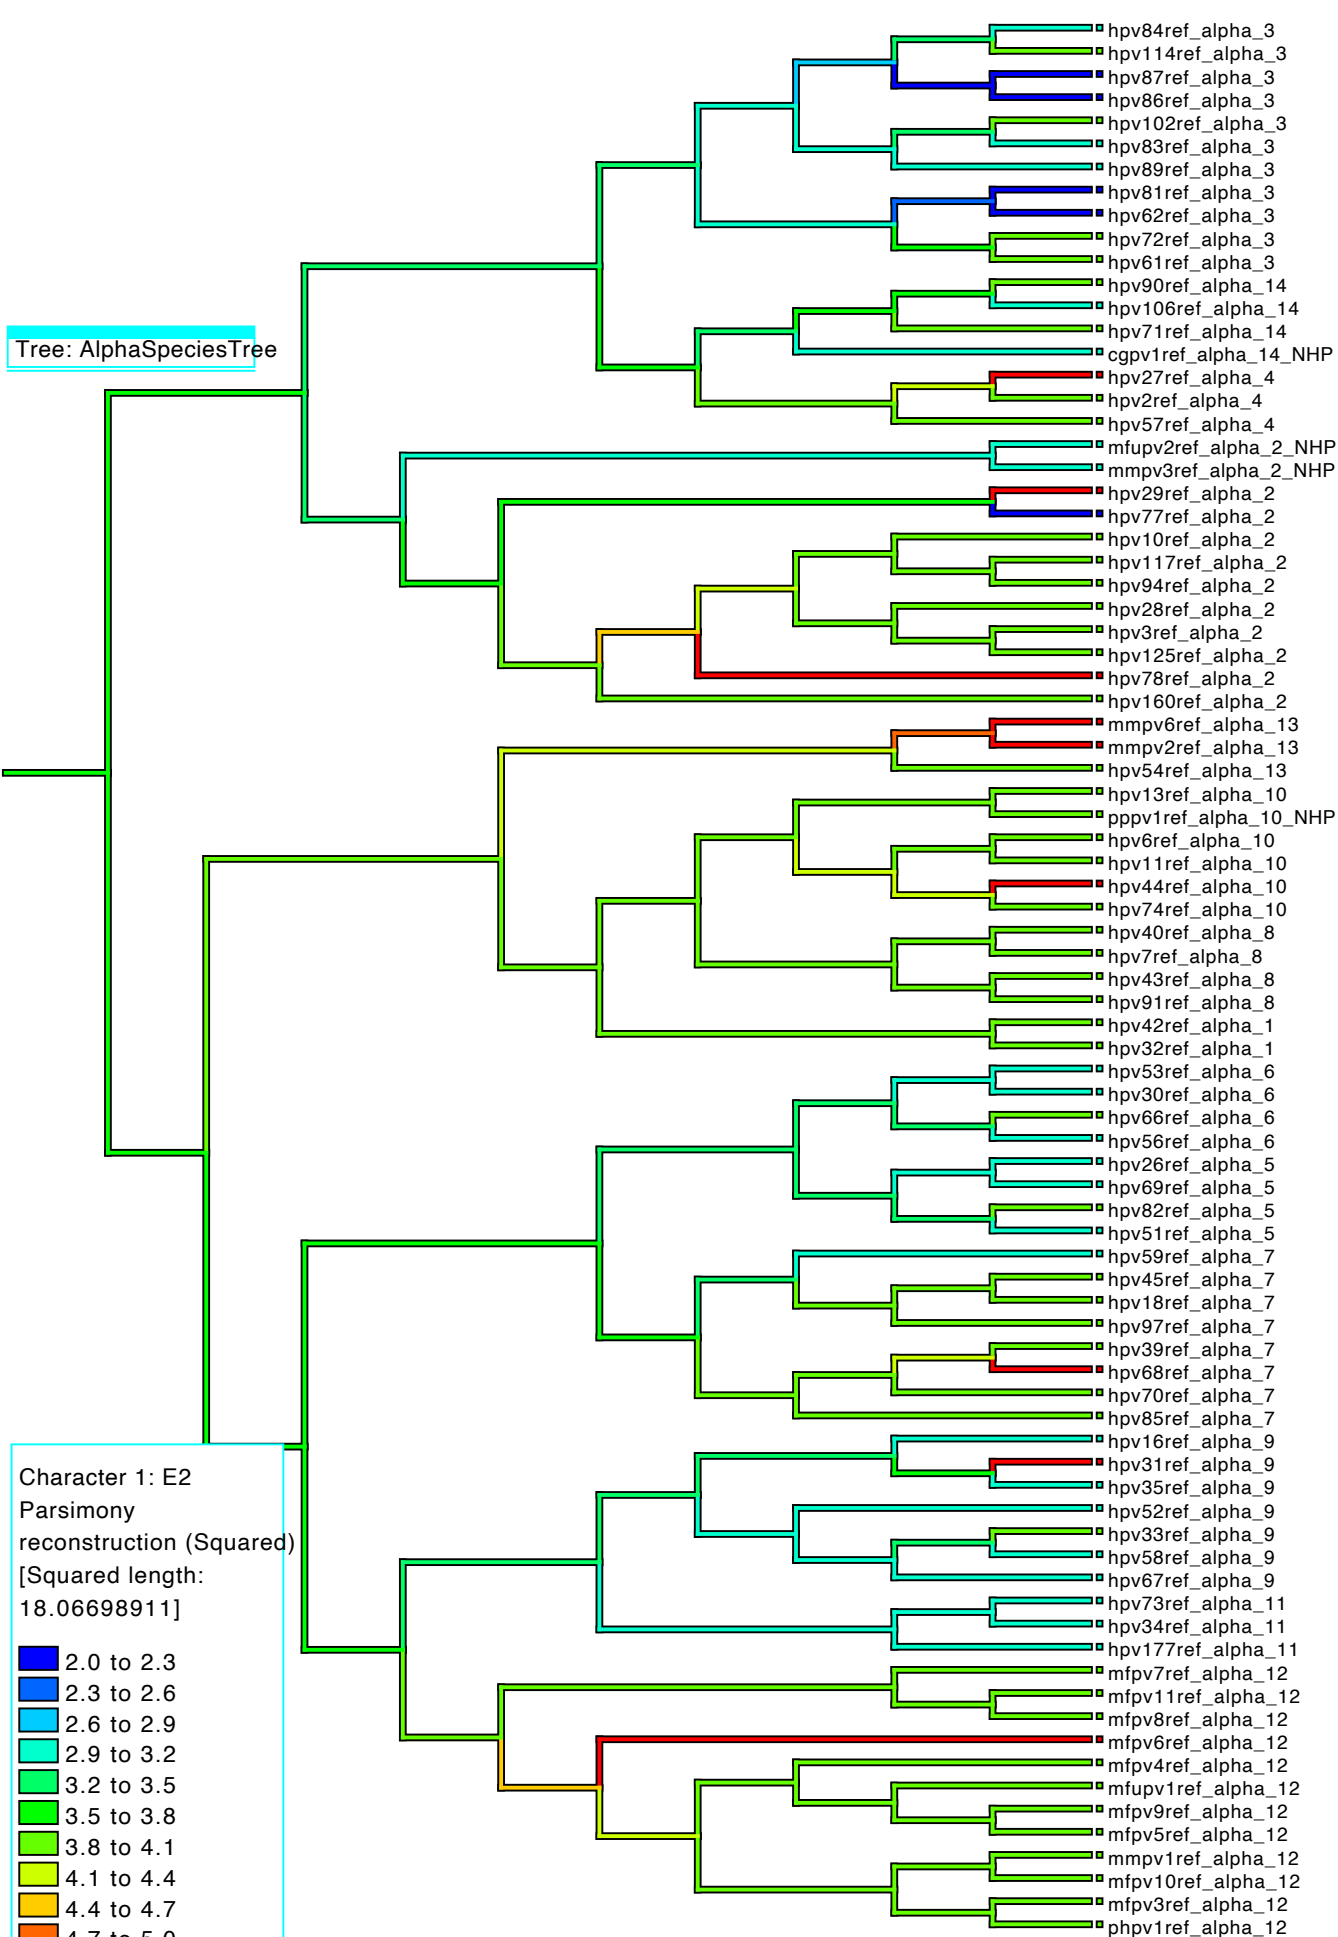

Supplement: Supplementary file 2 [file supplementary]

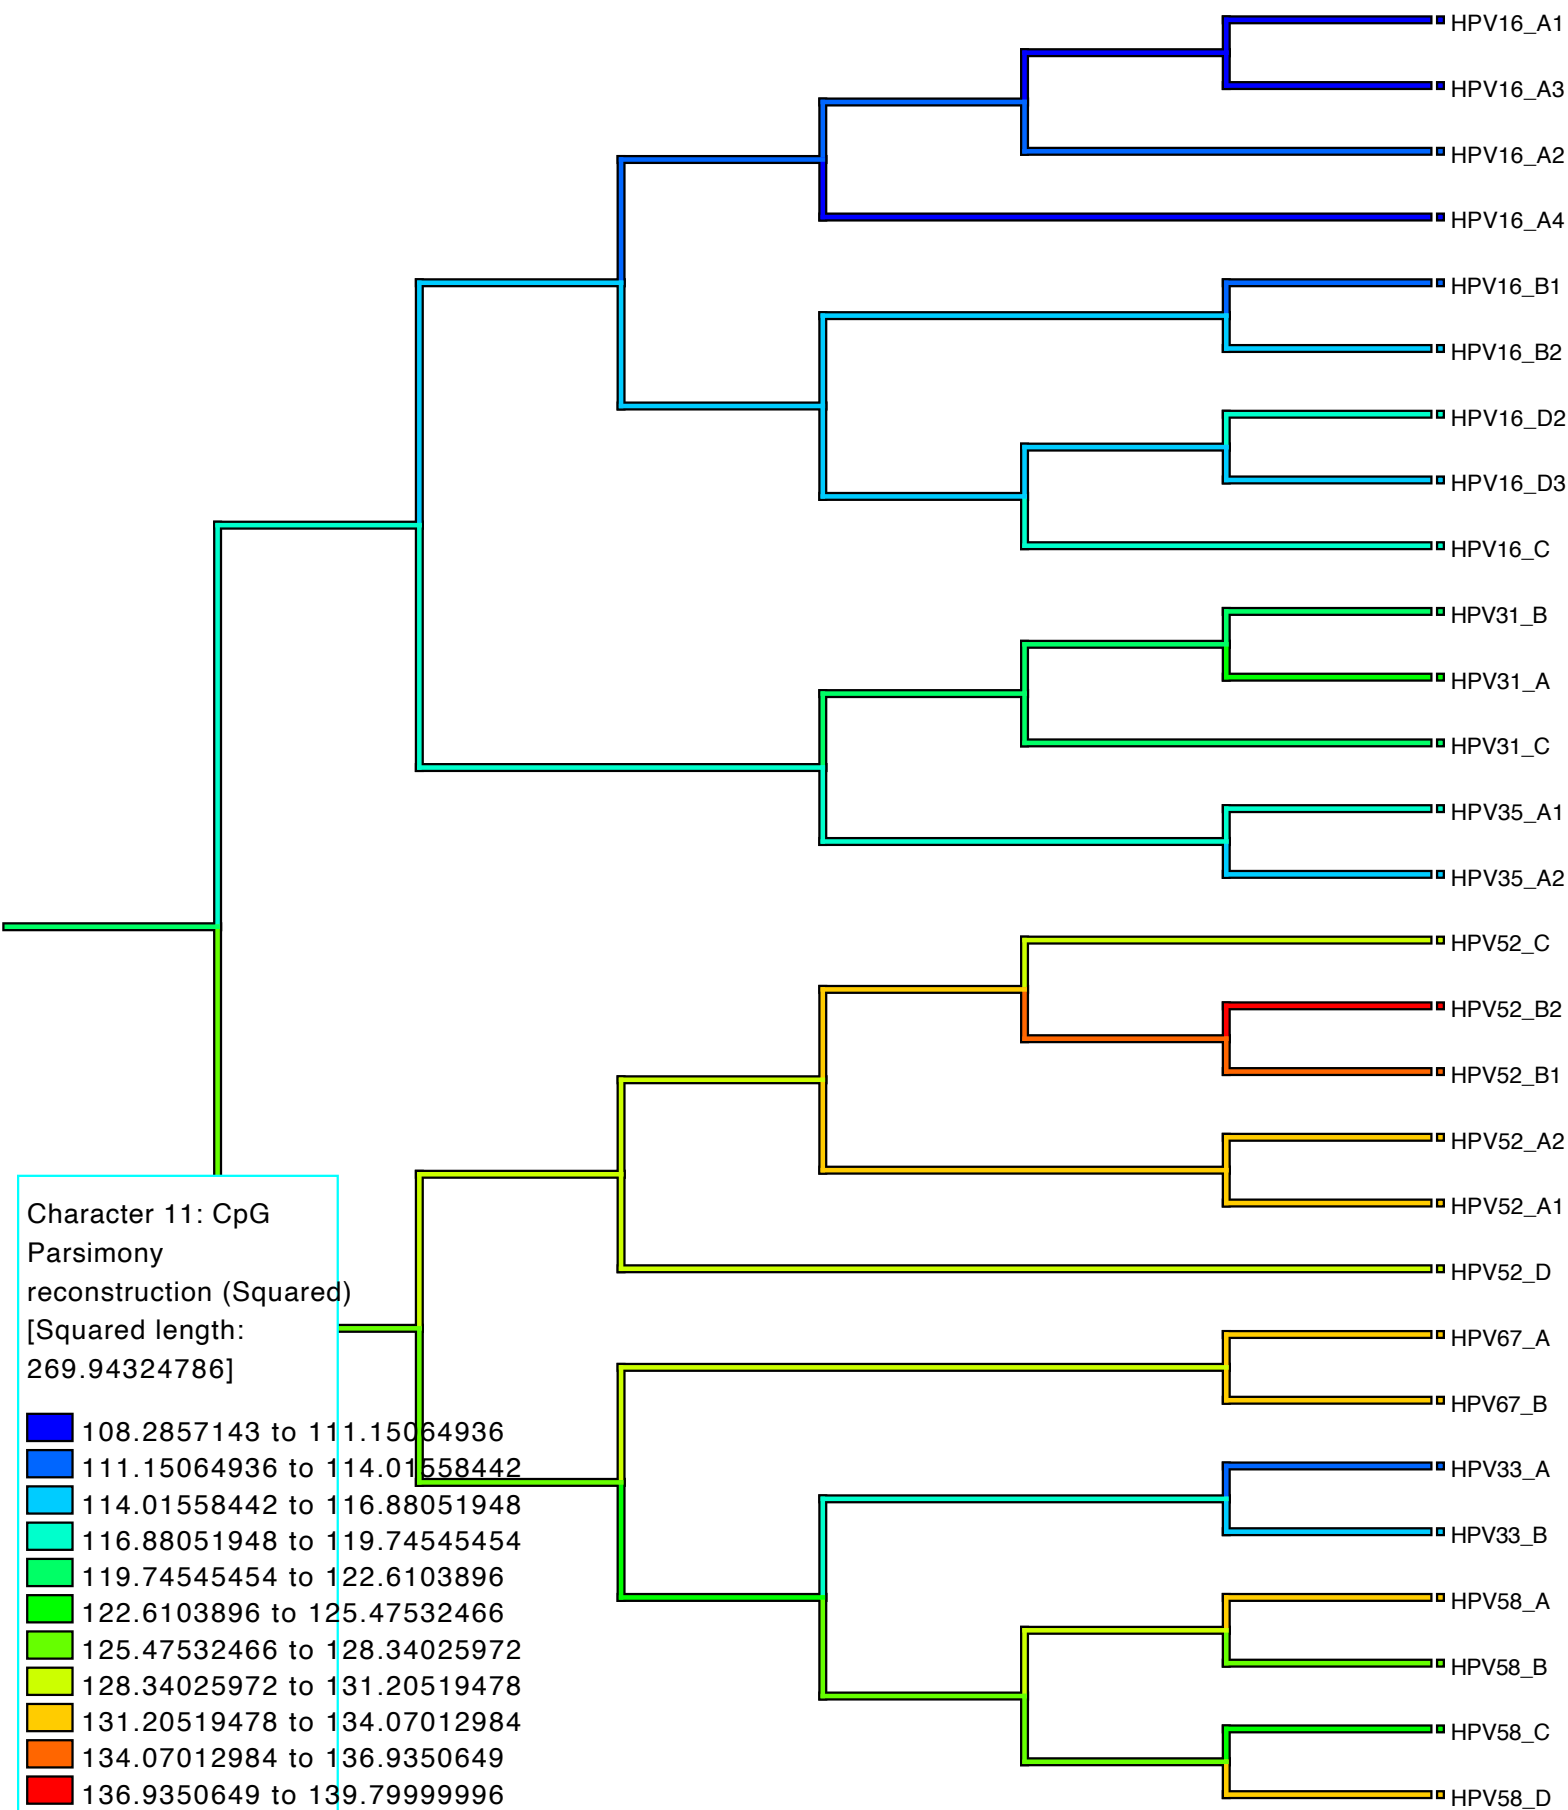

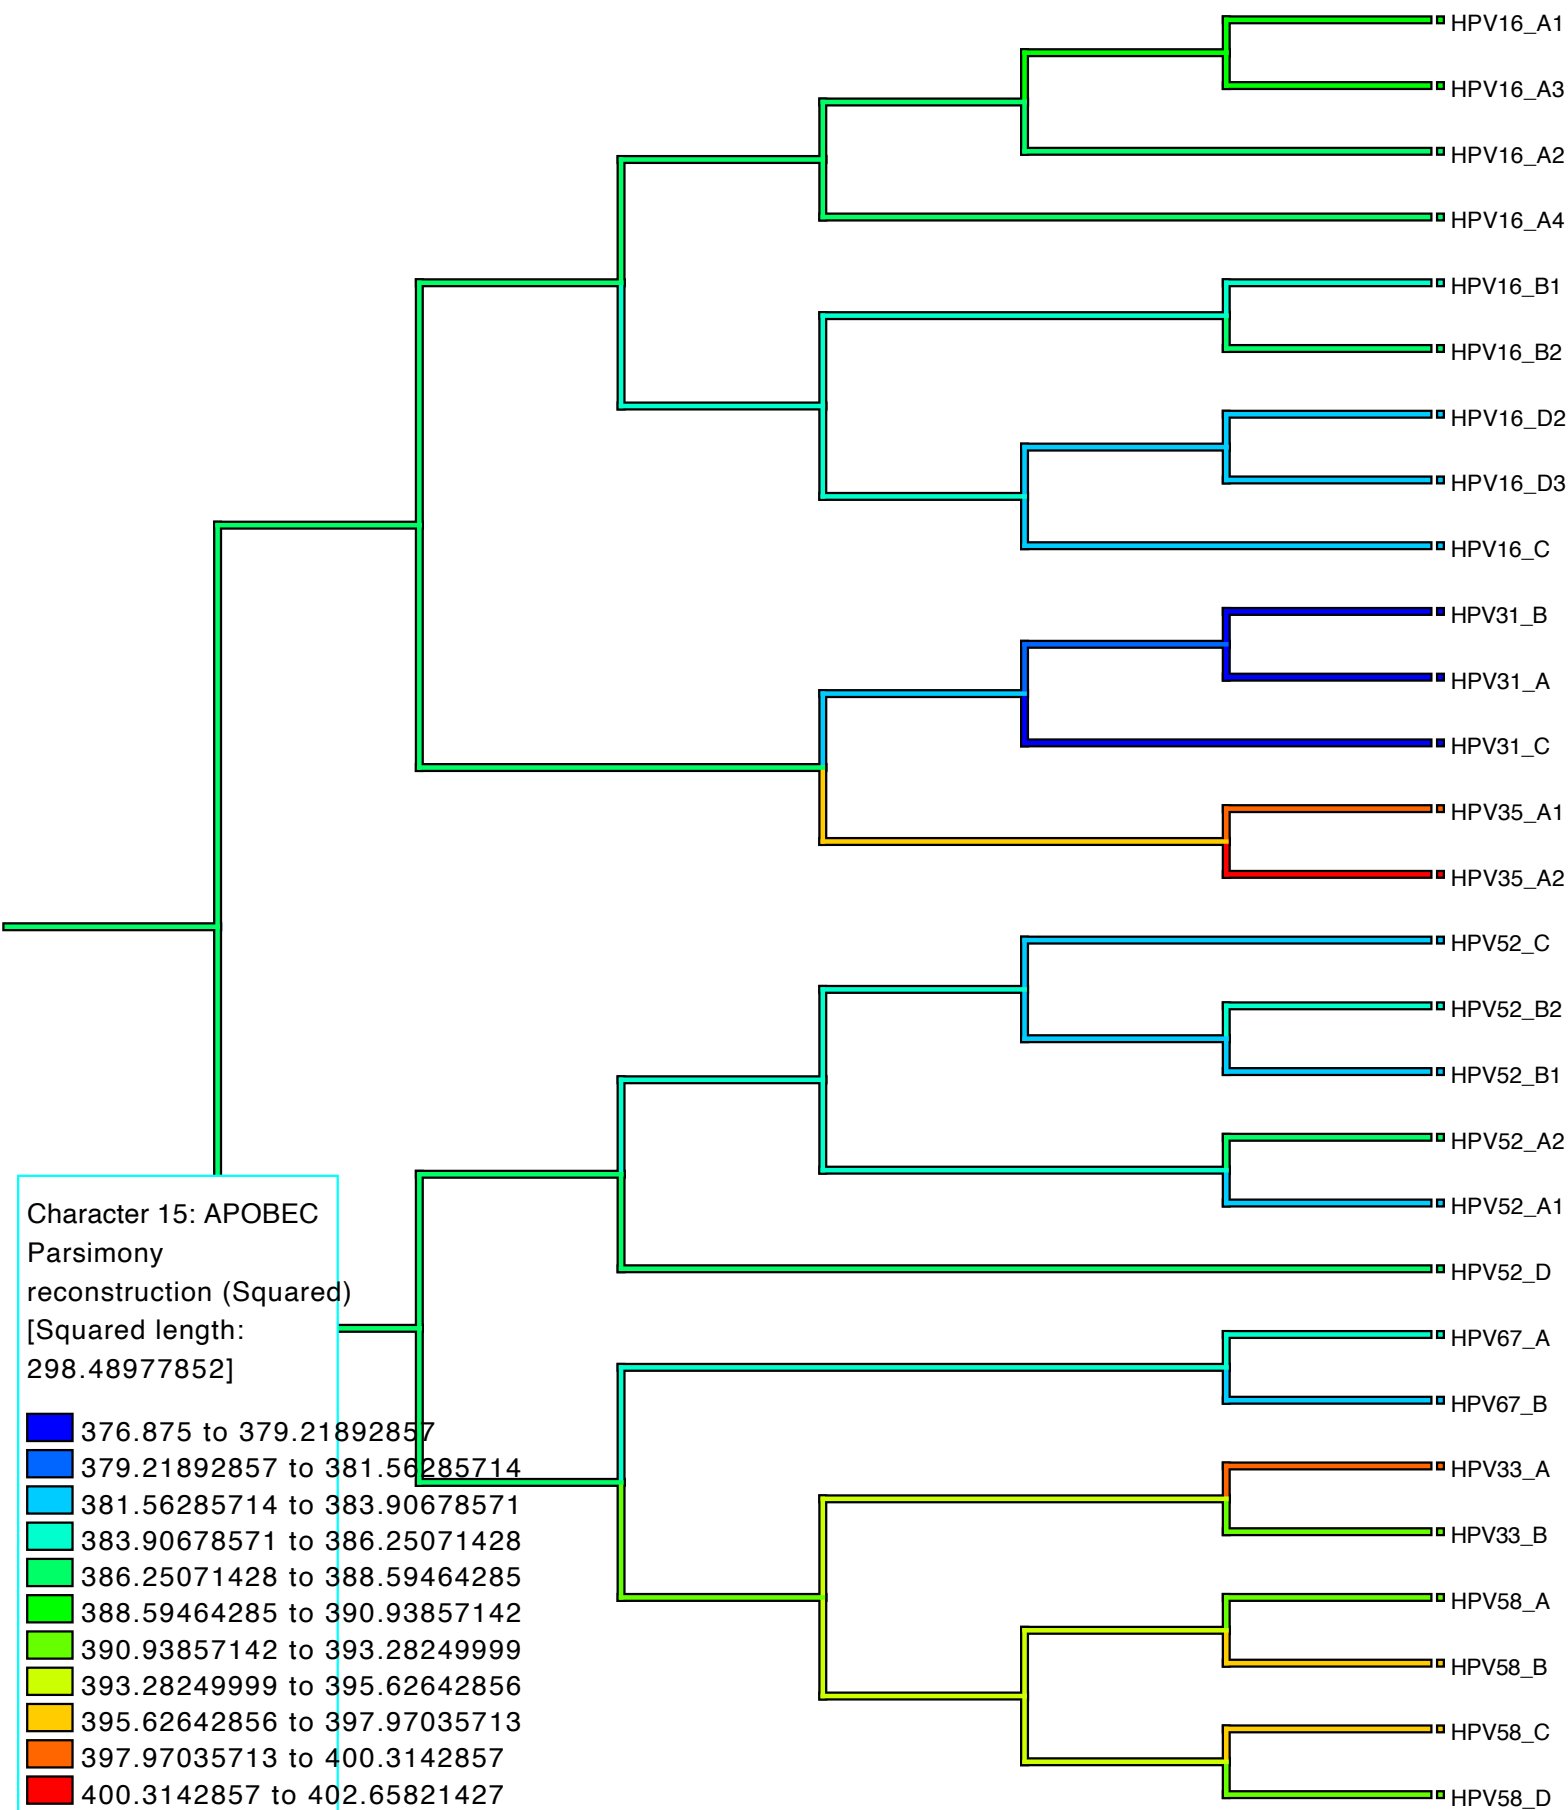

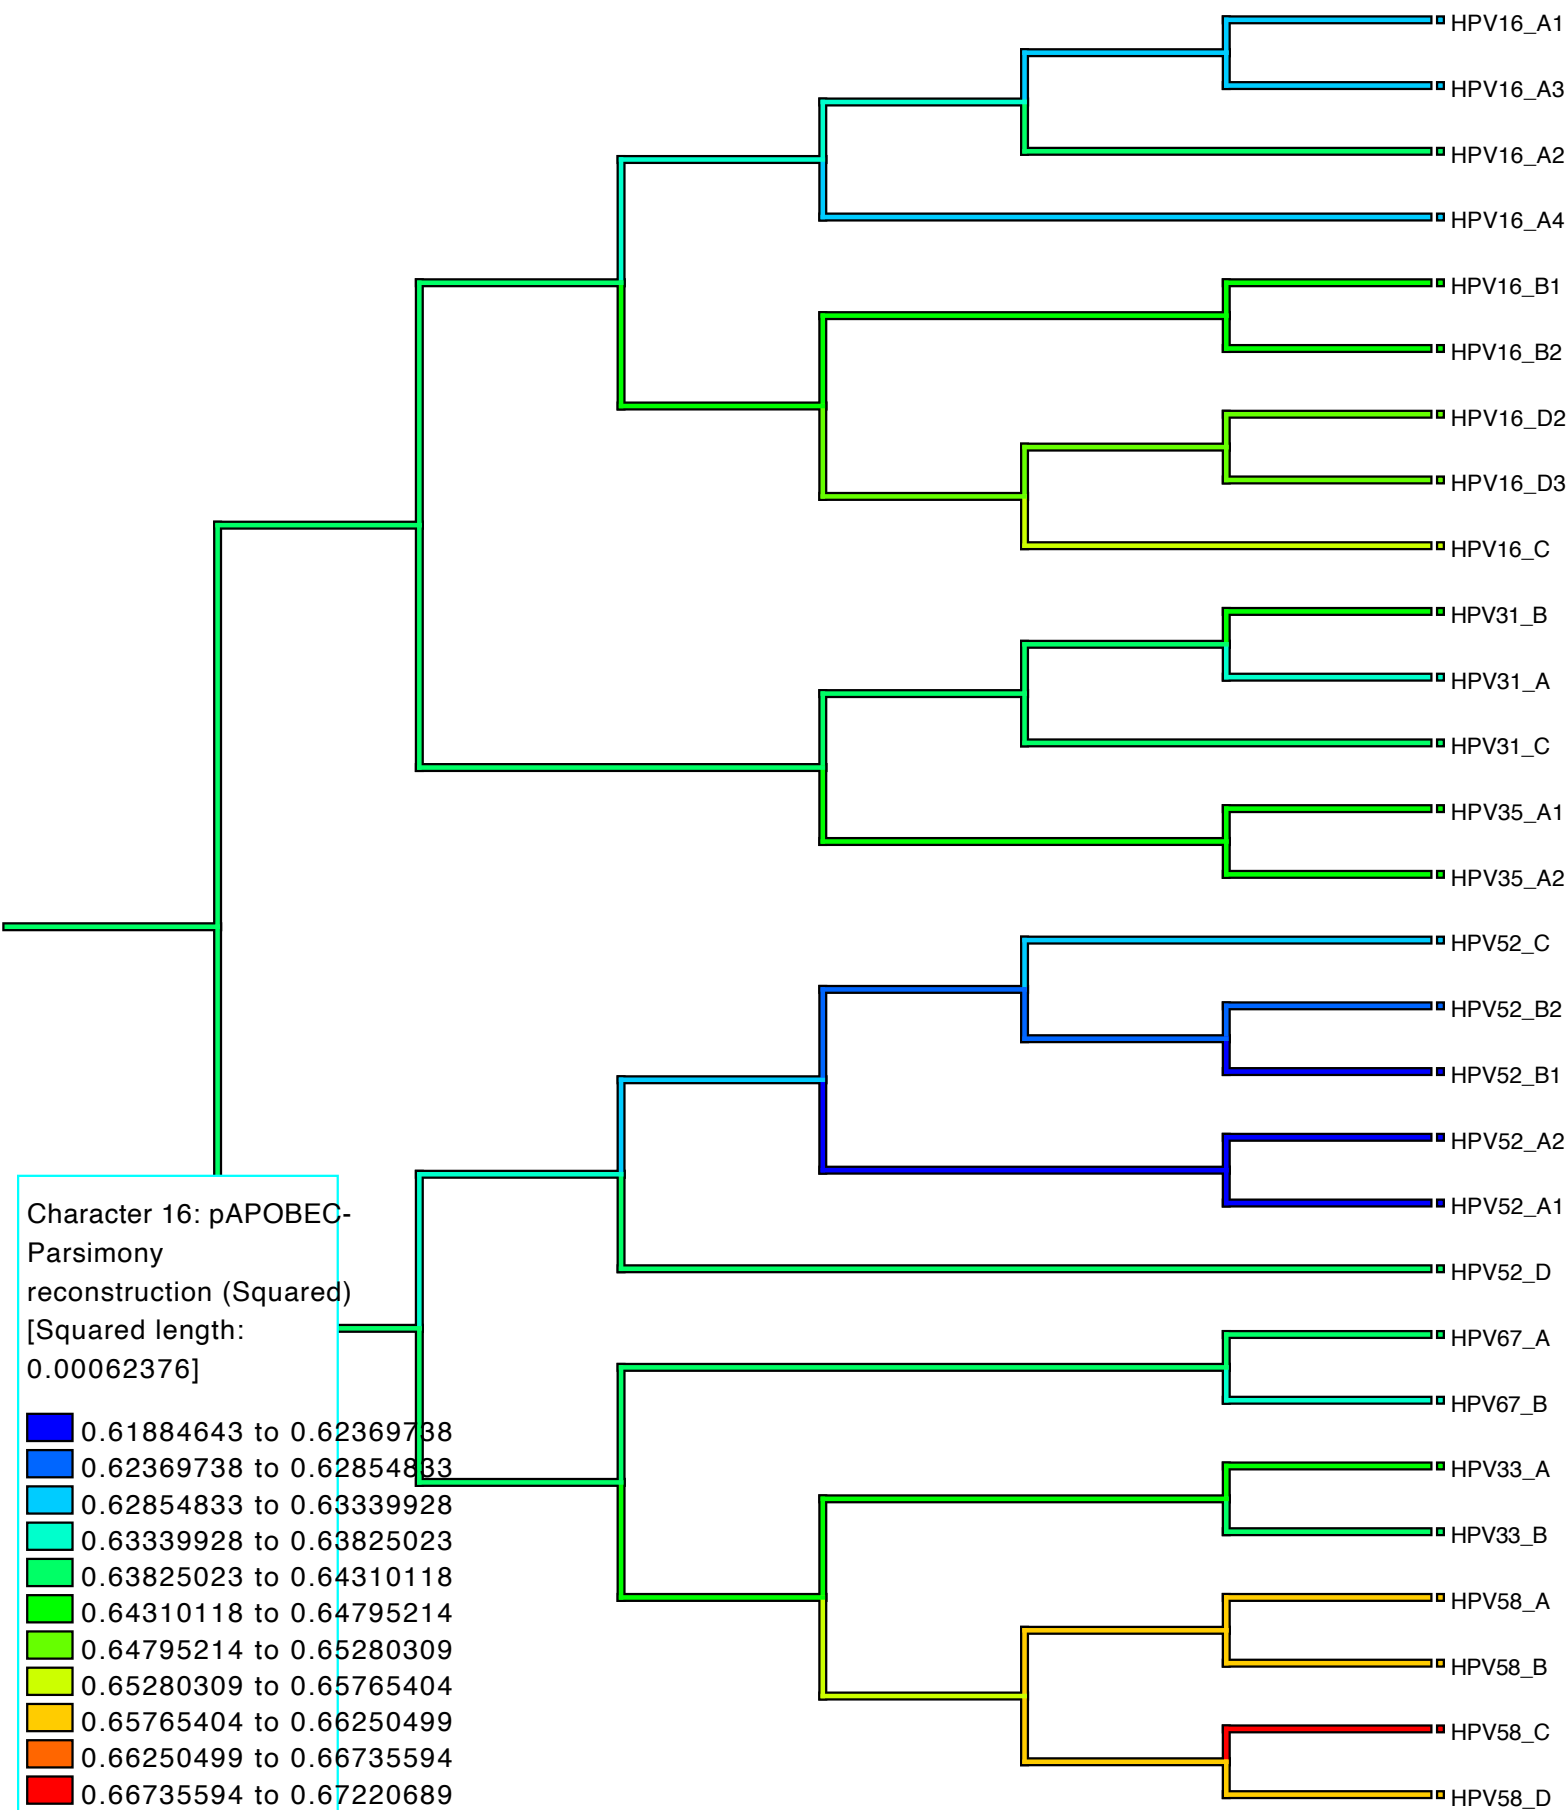

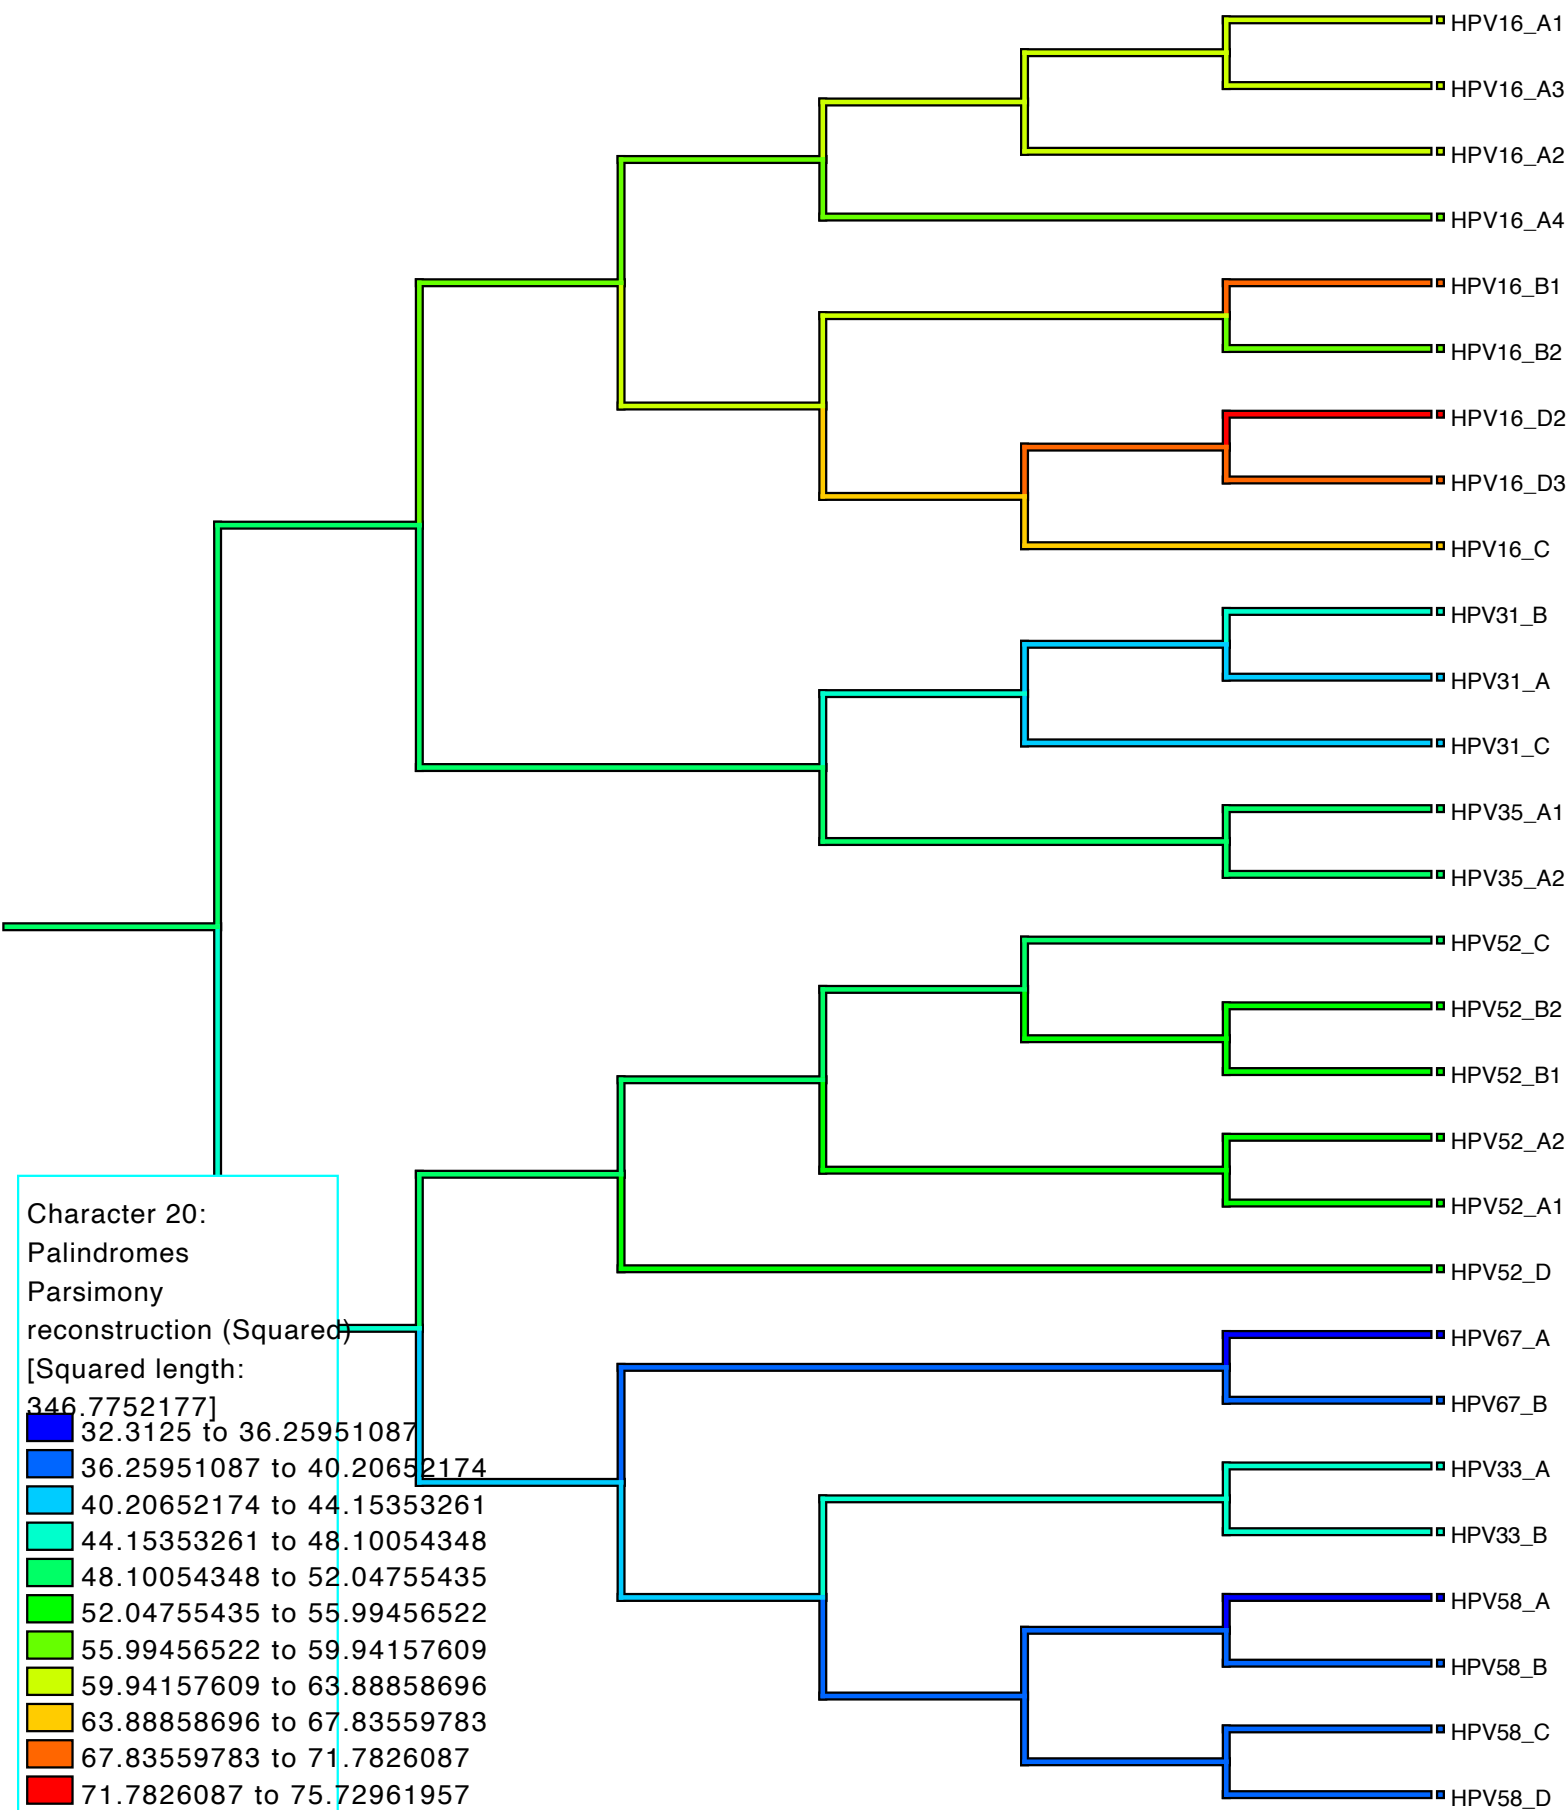

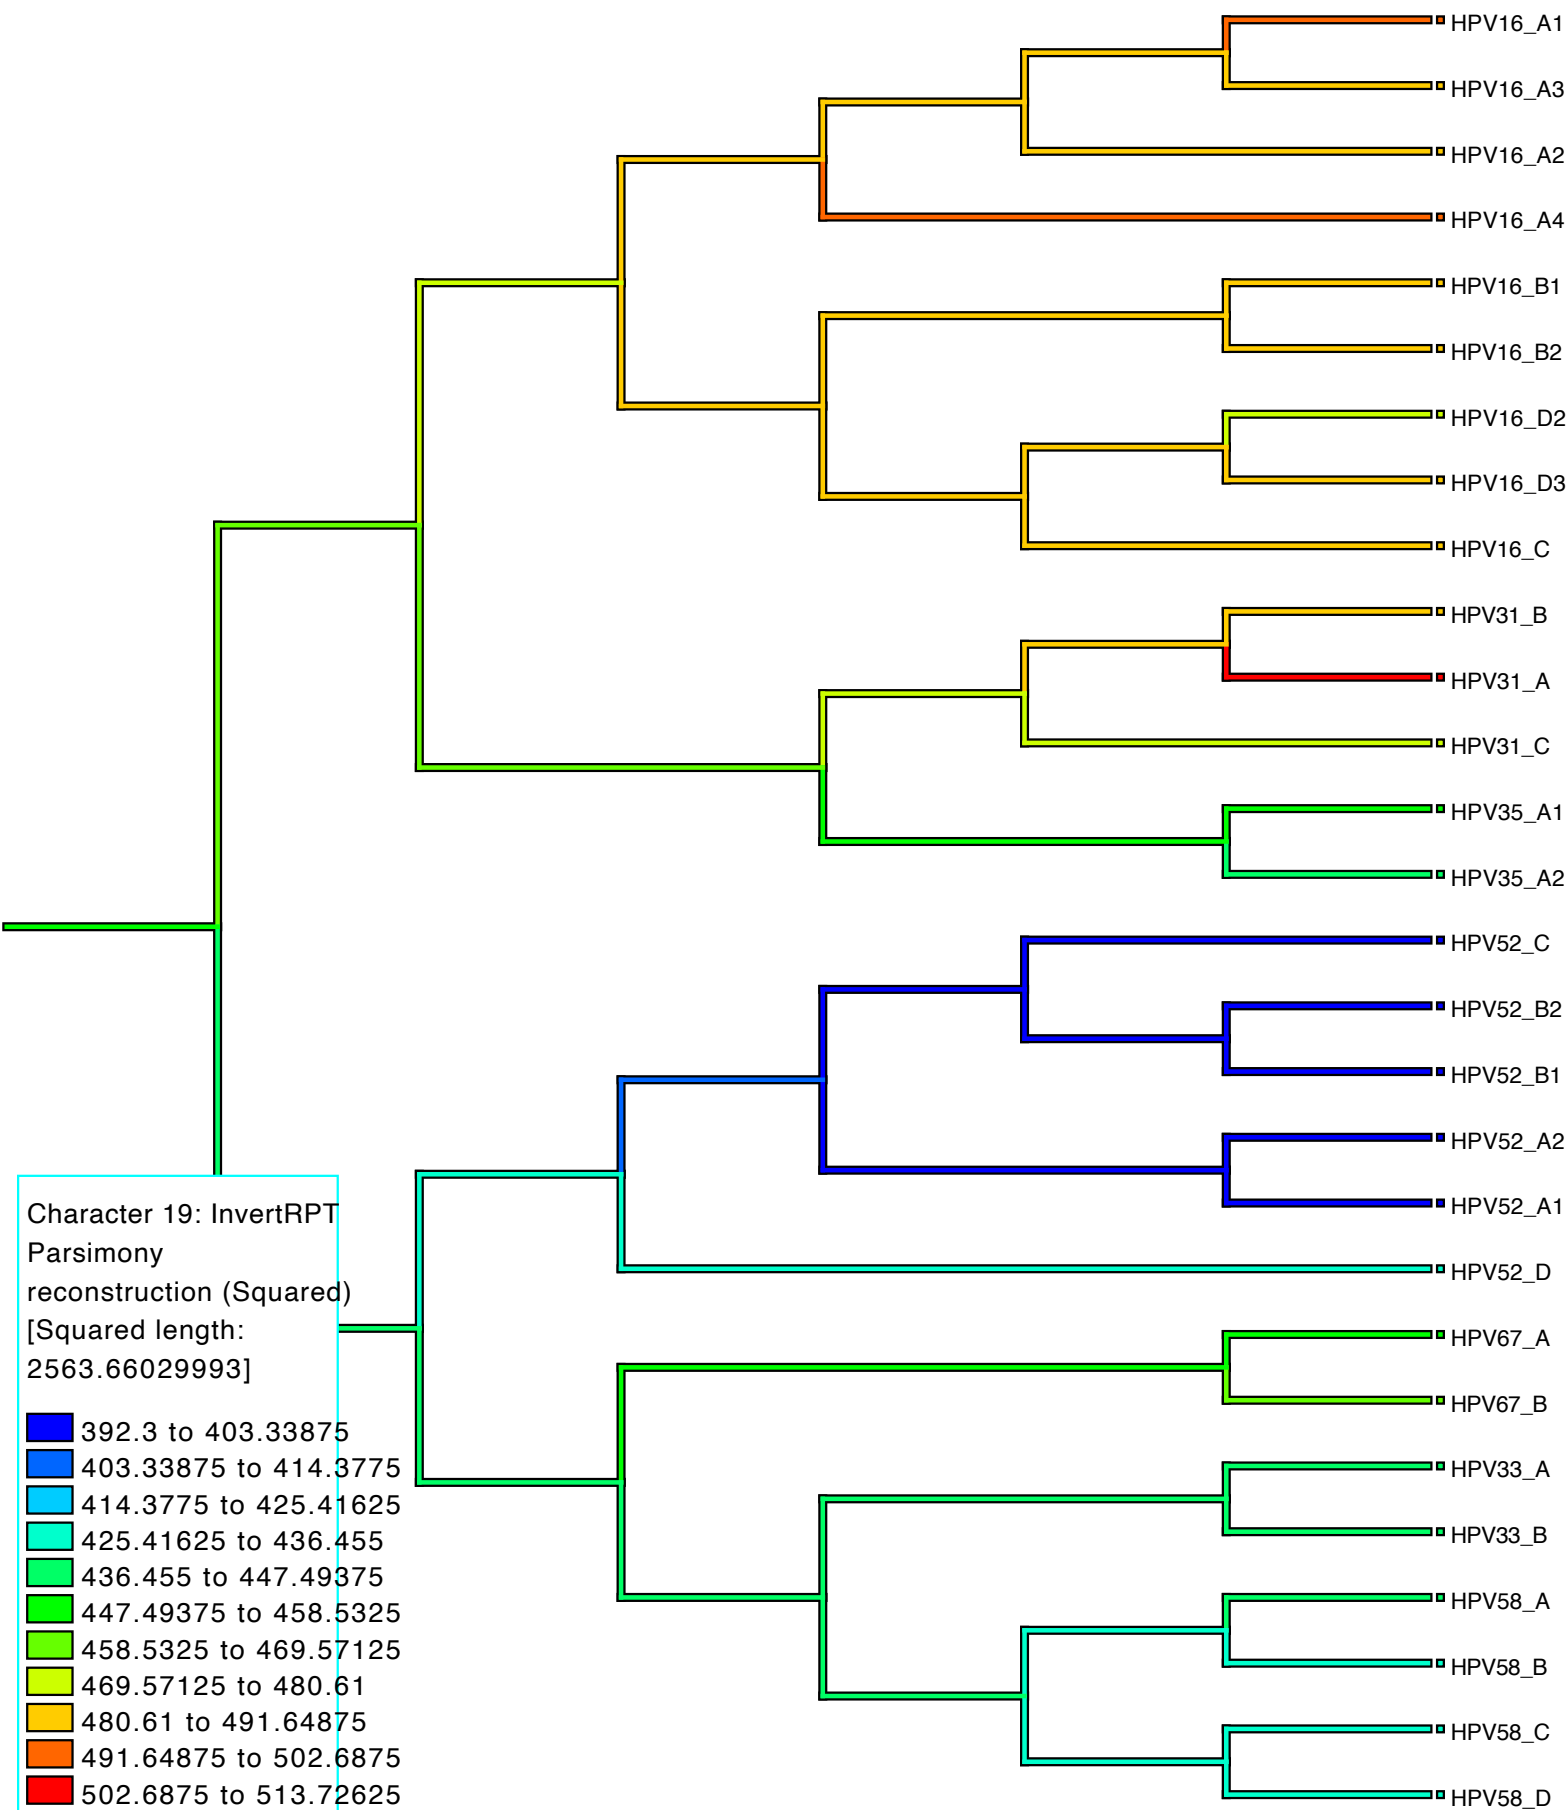

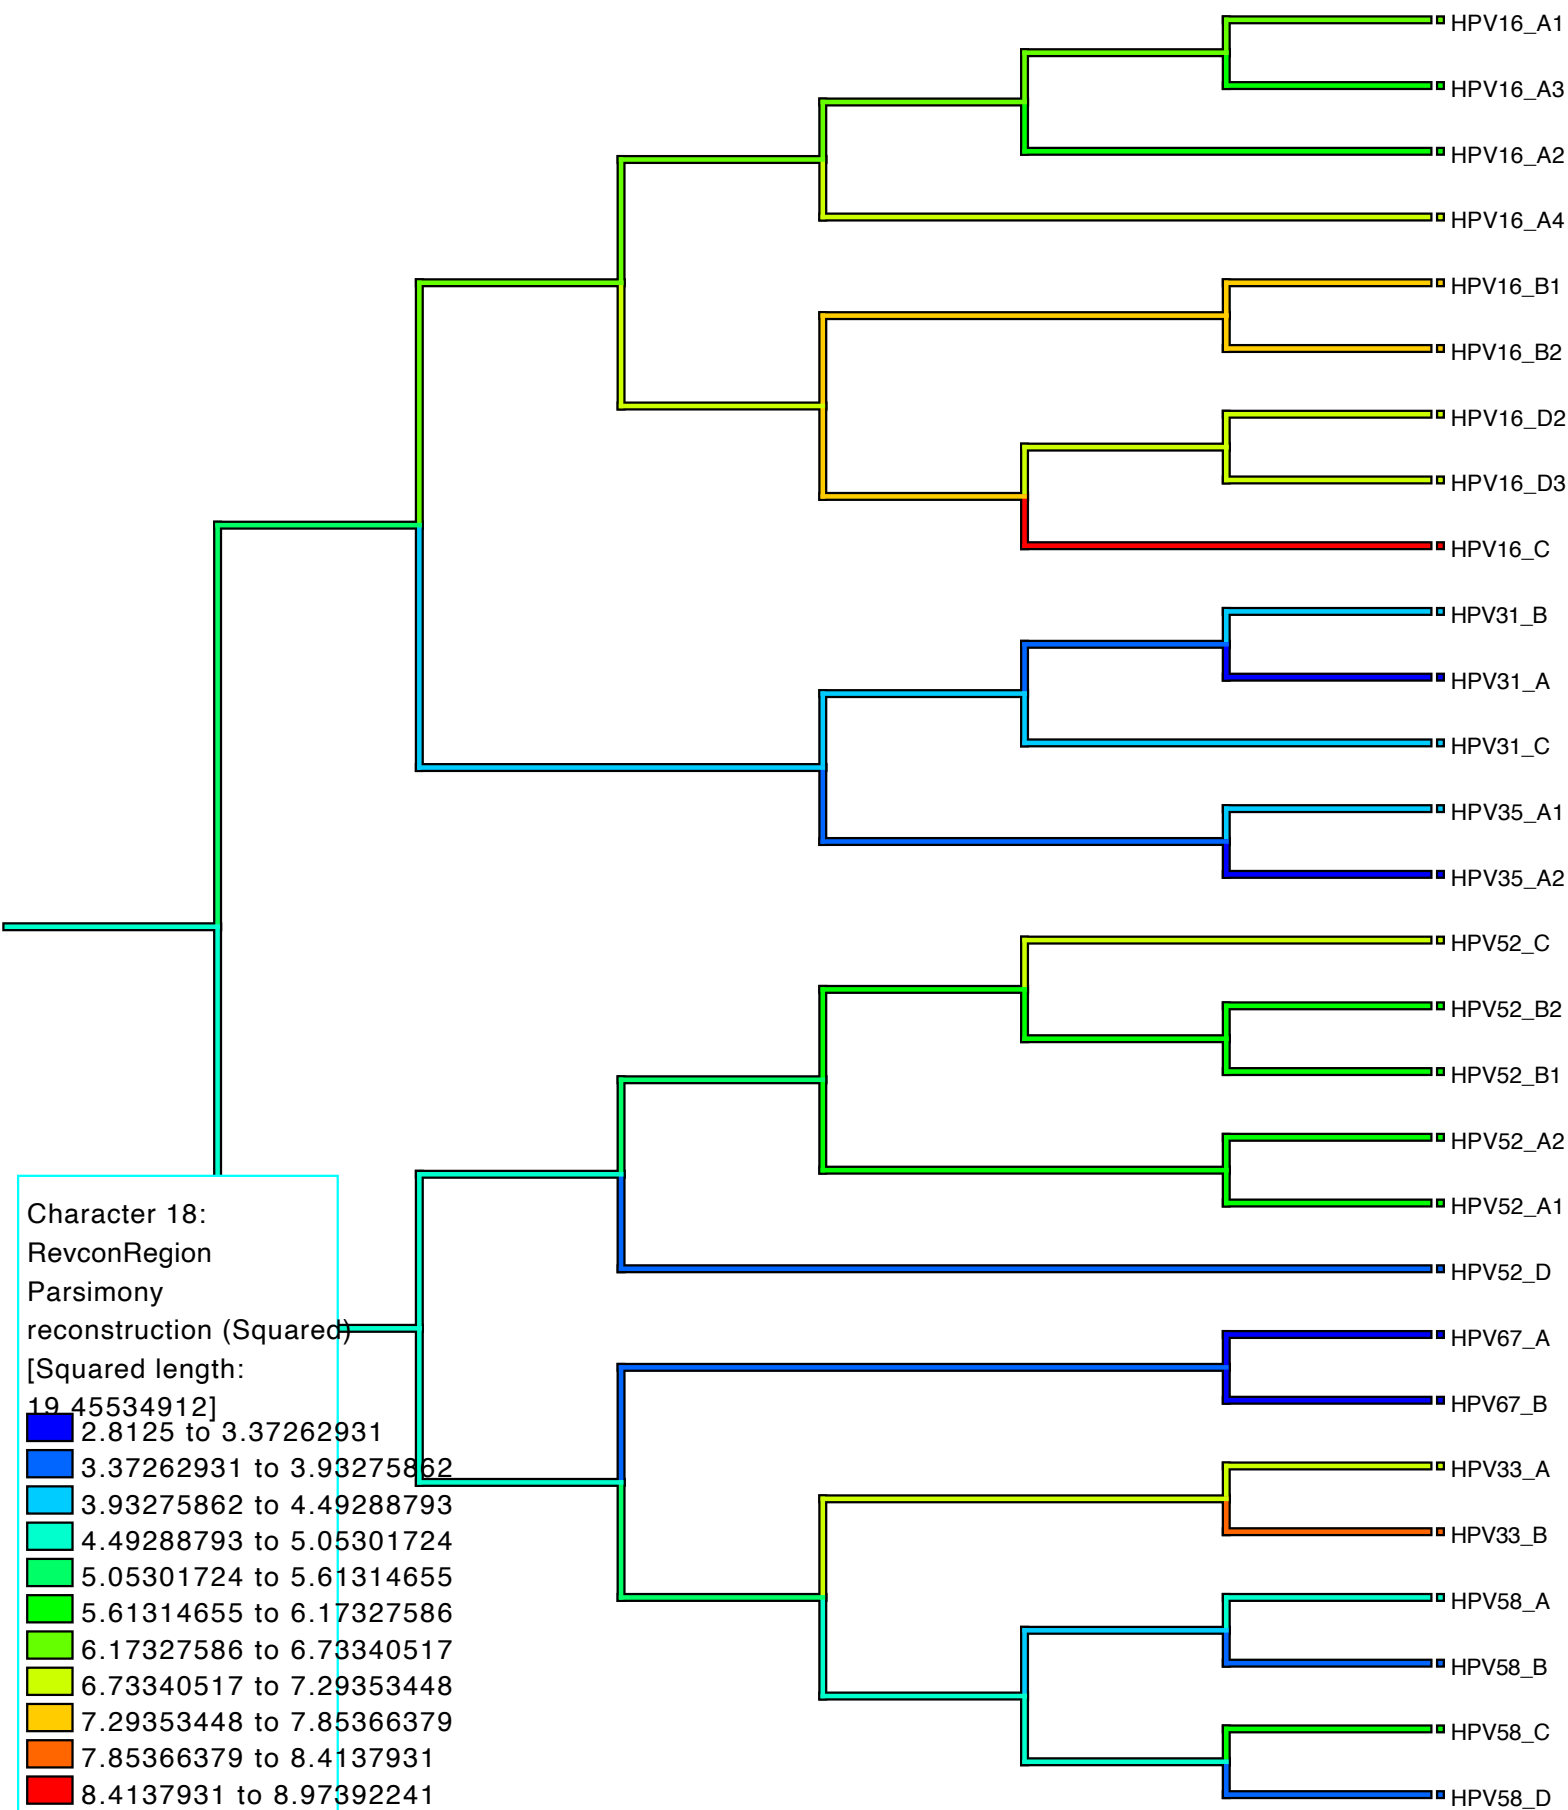

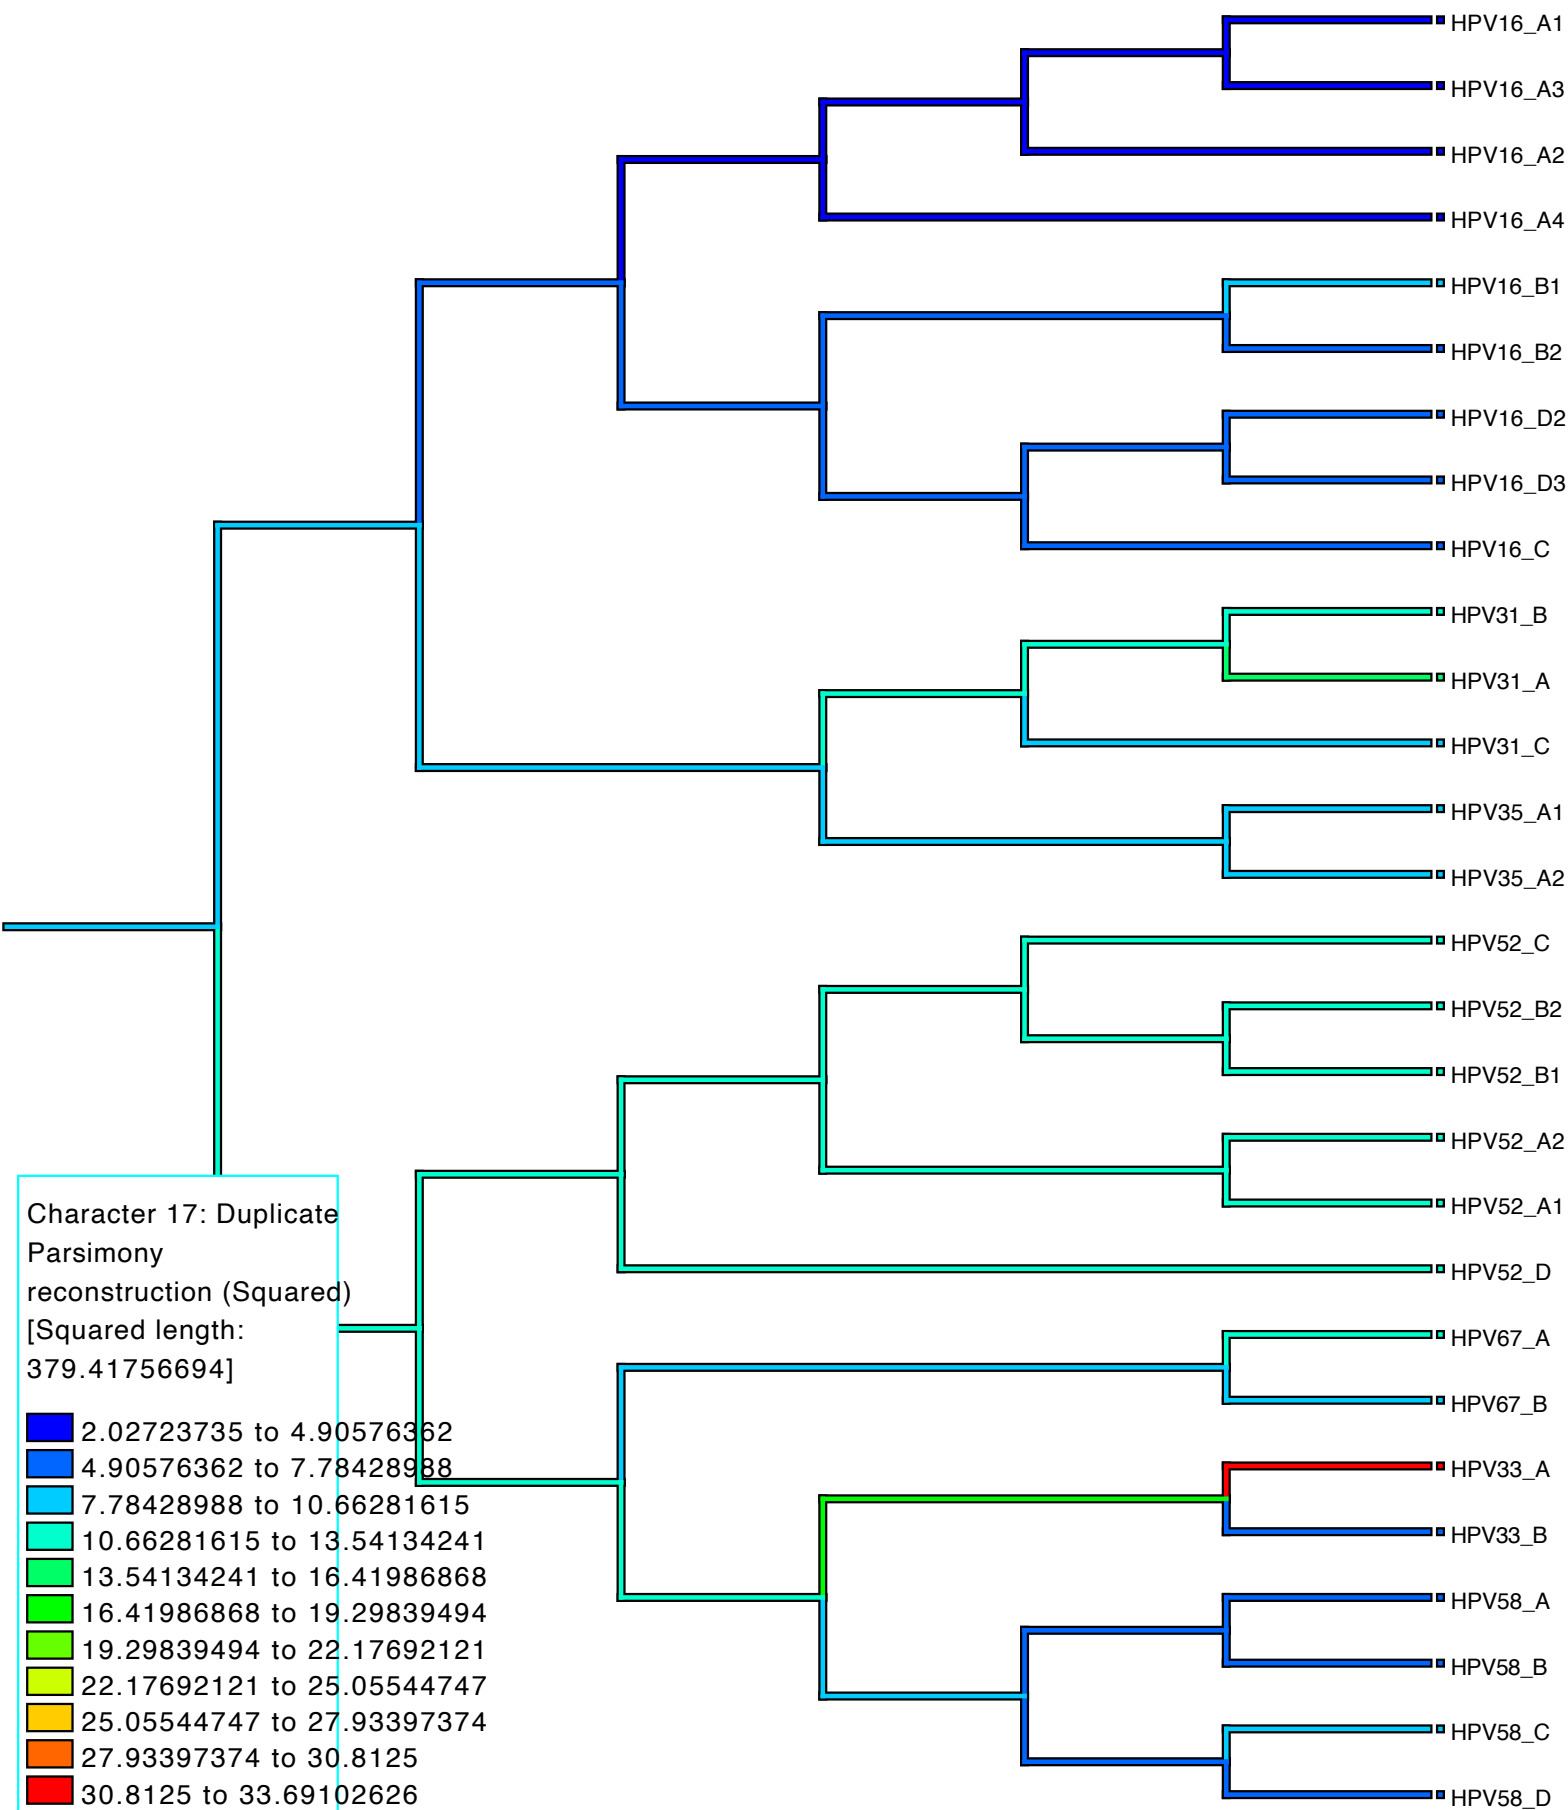

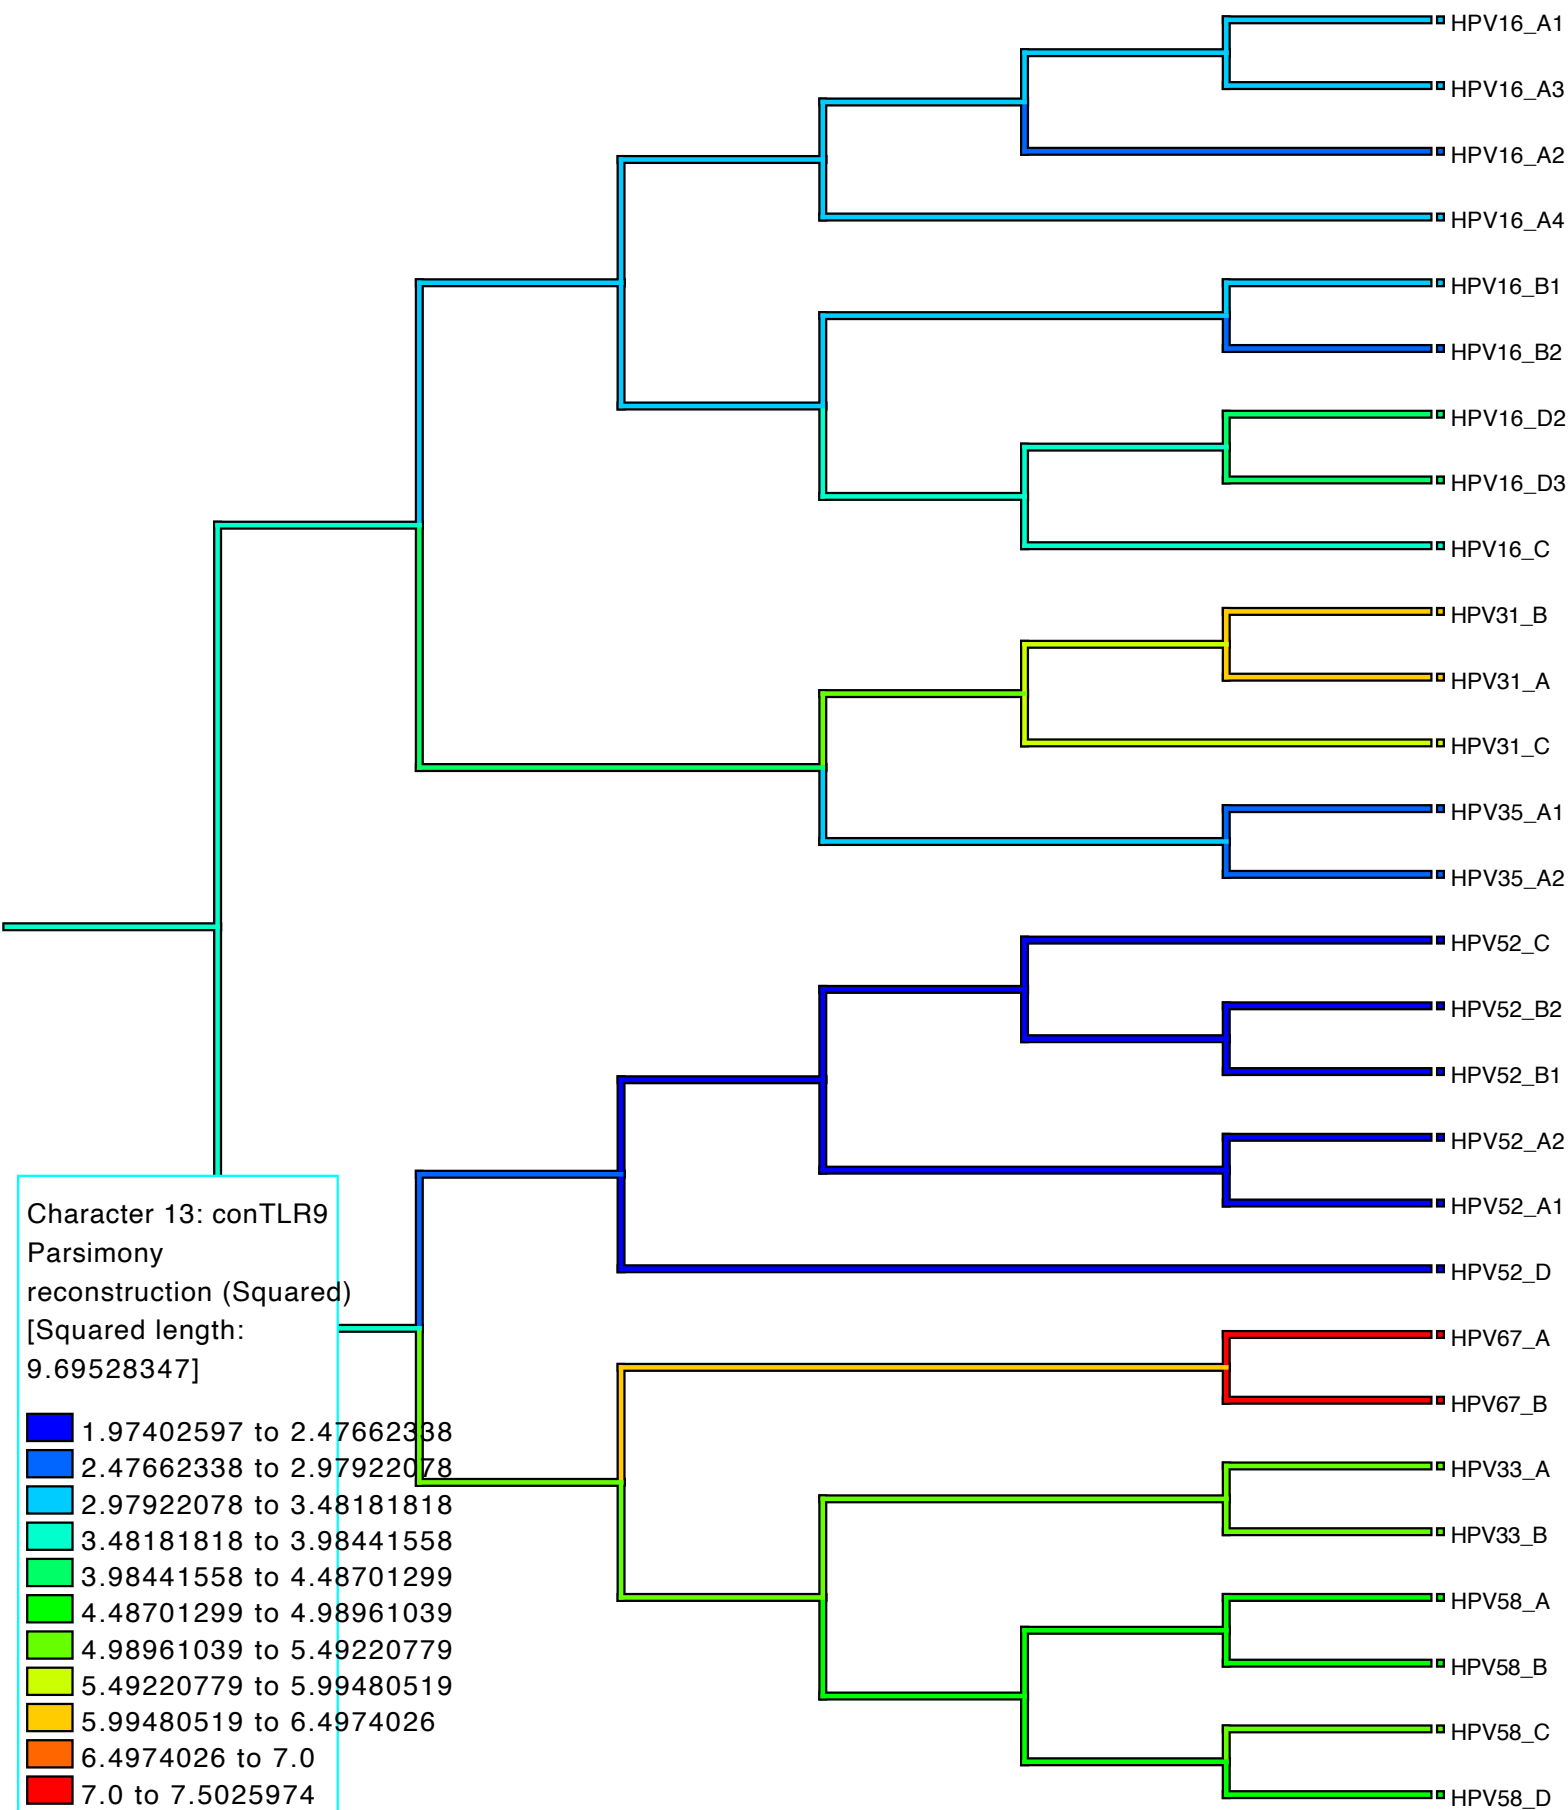



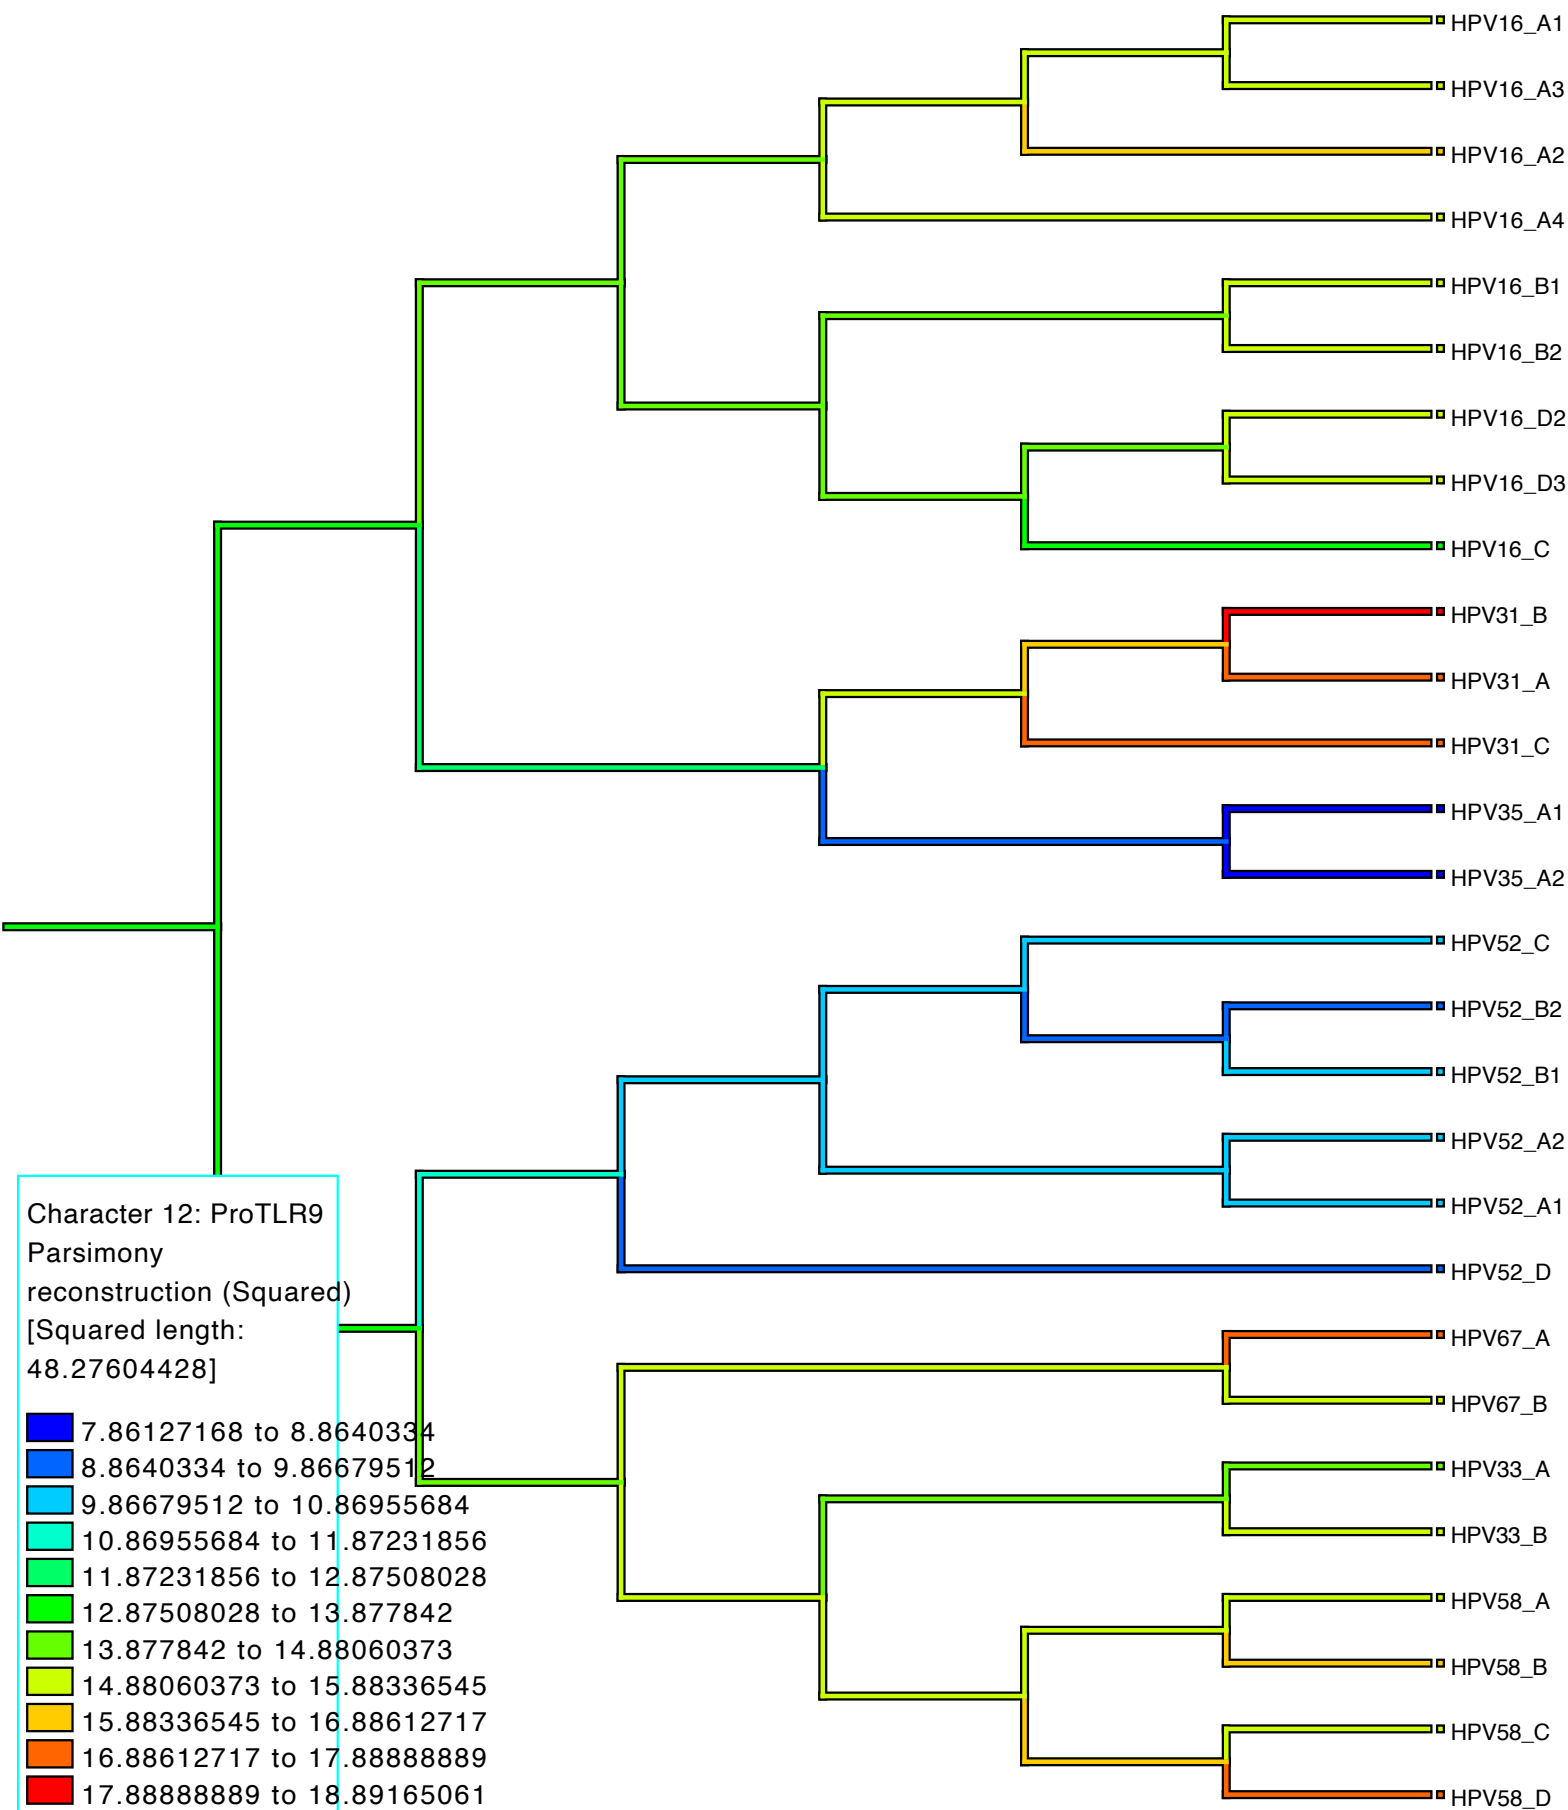

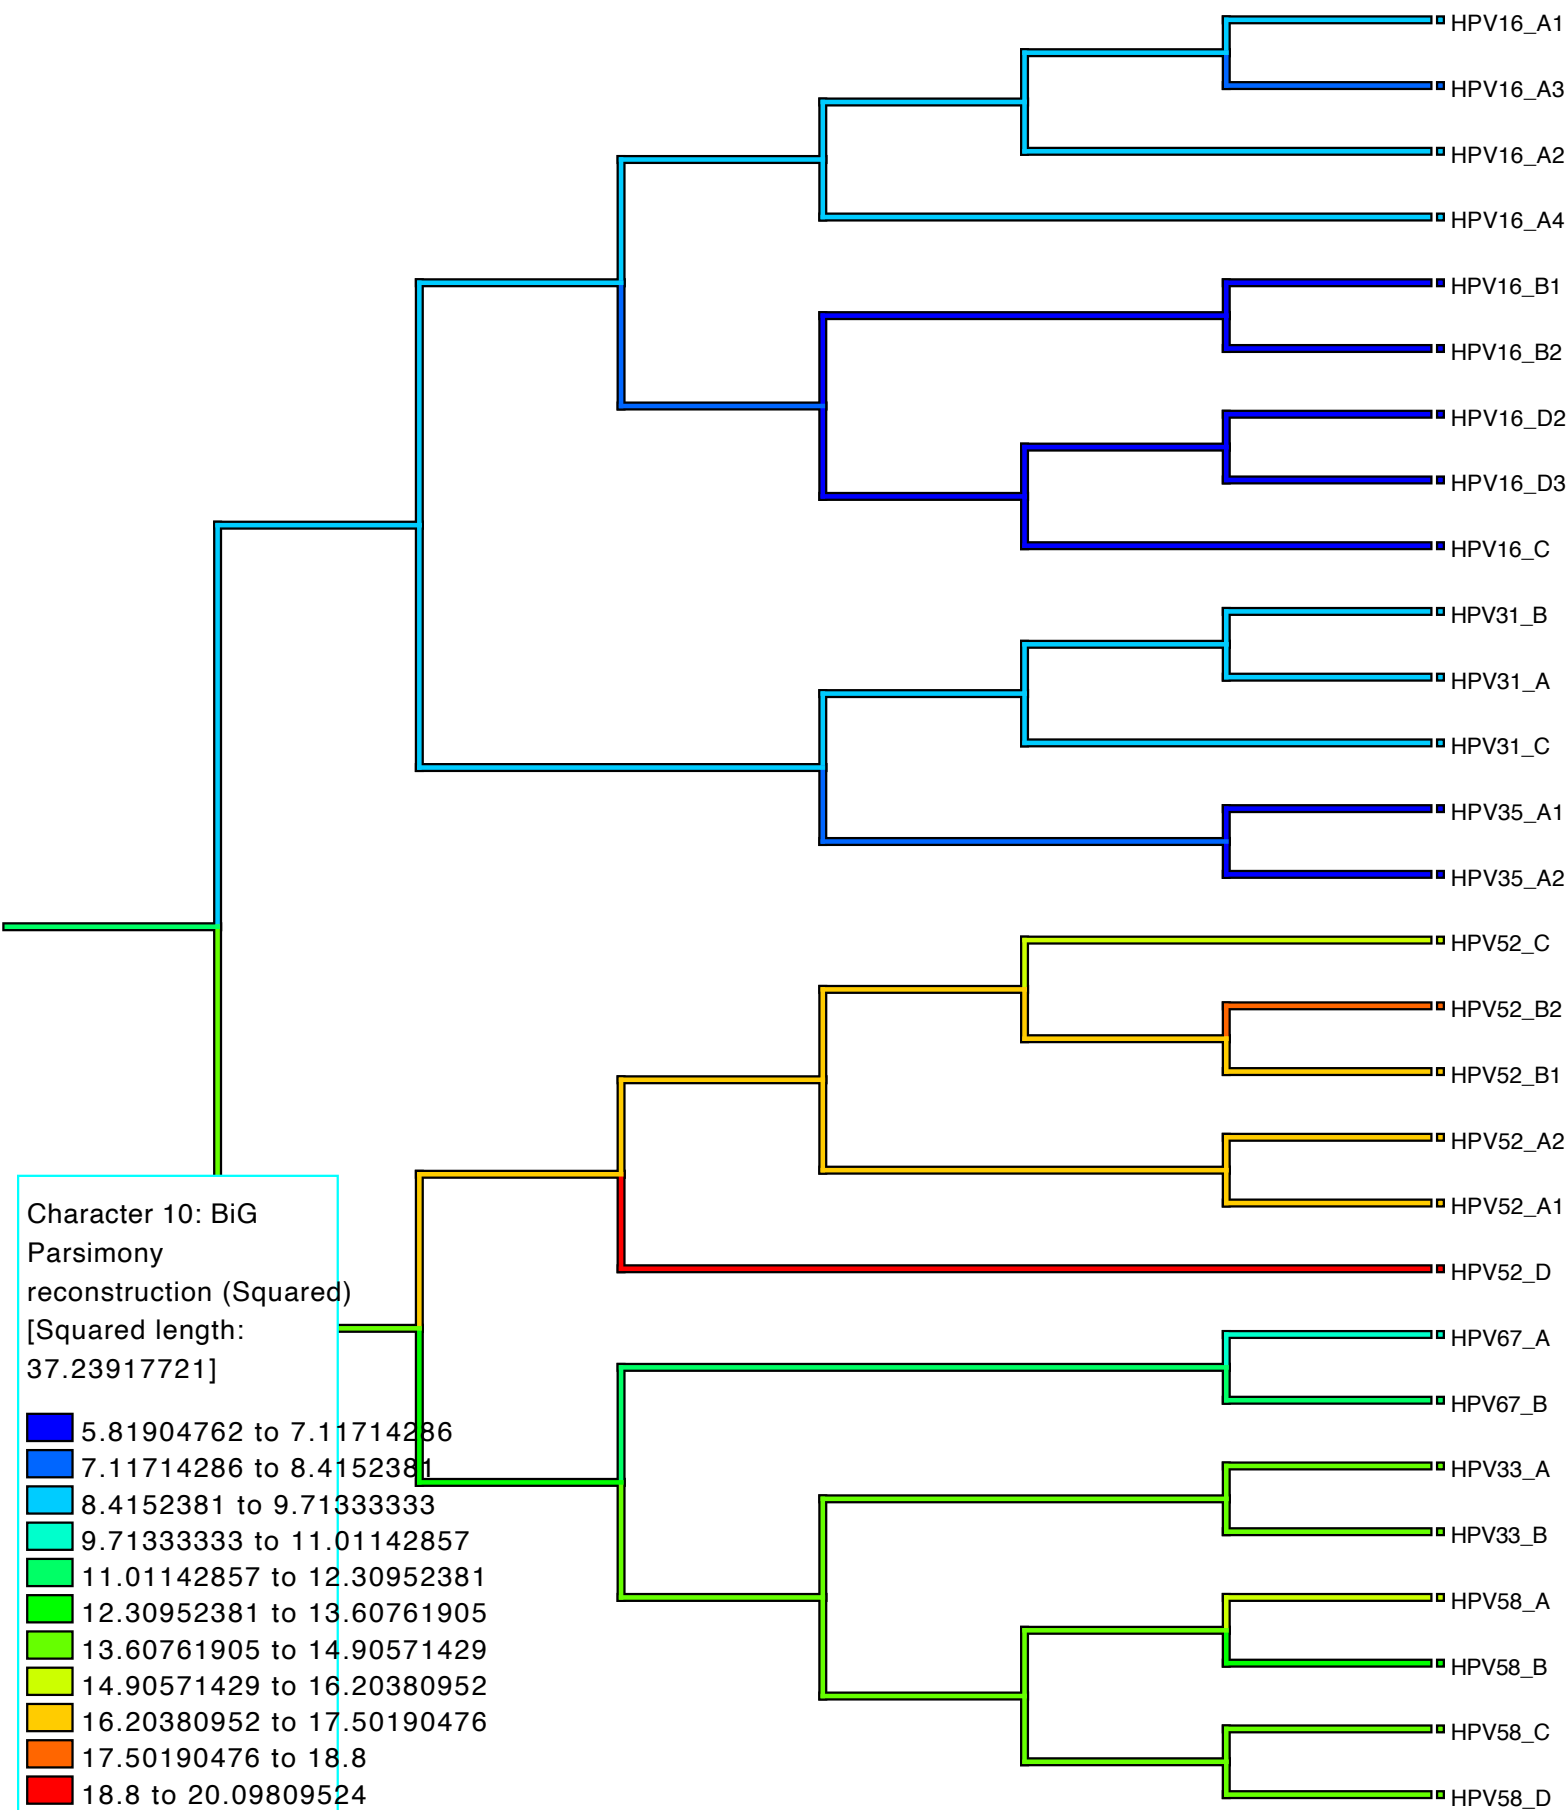

Supplement: Supplementary file 6 [file supplementary]
